# Supplementary material for: Exposure to nanoceria impacts larval survival, life history traits and fecundity of Aedes aegypti
Source: PubMed Central journal article supplement (PMC7540862; doi:10.1371/journal.pntd.0008654), 2020-09-25

**Experimental Flowchart:** Experimental workflow for figures 6-9. Red arrows indicate the listed subfigures of a given main figure. Black arrows indicate the sequential flow of mosquitoes and/or eggs from a given prior experiment/figure into the listed succeeding experiment/figure.

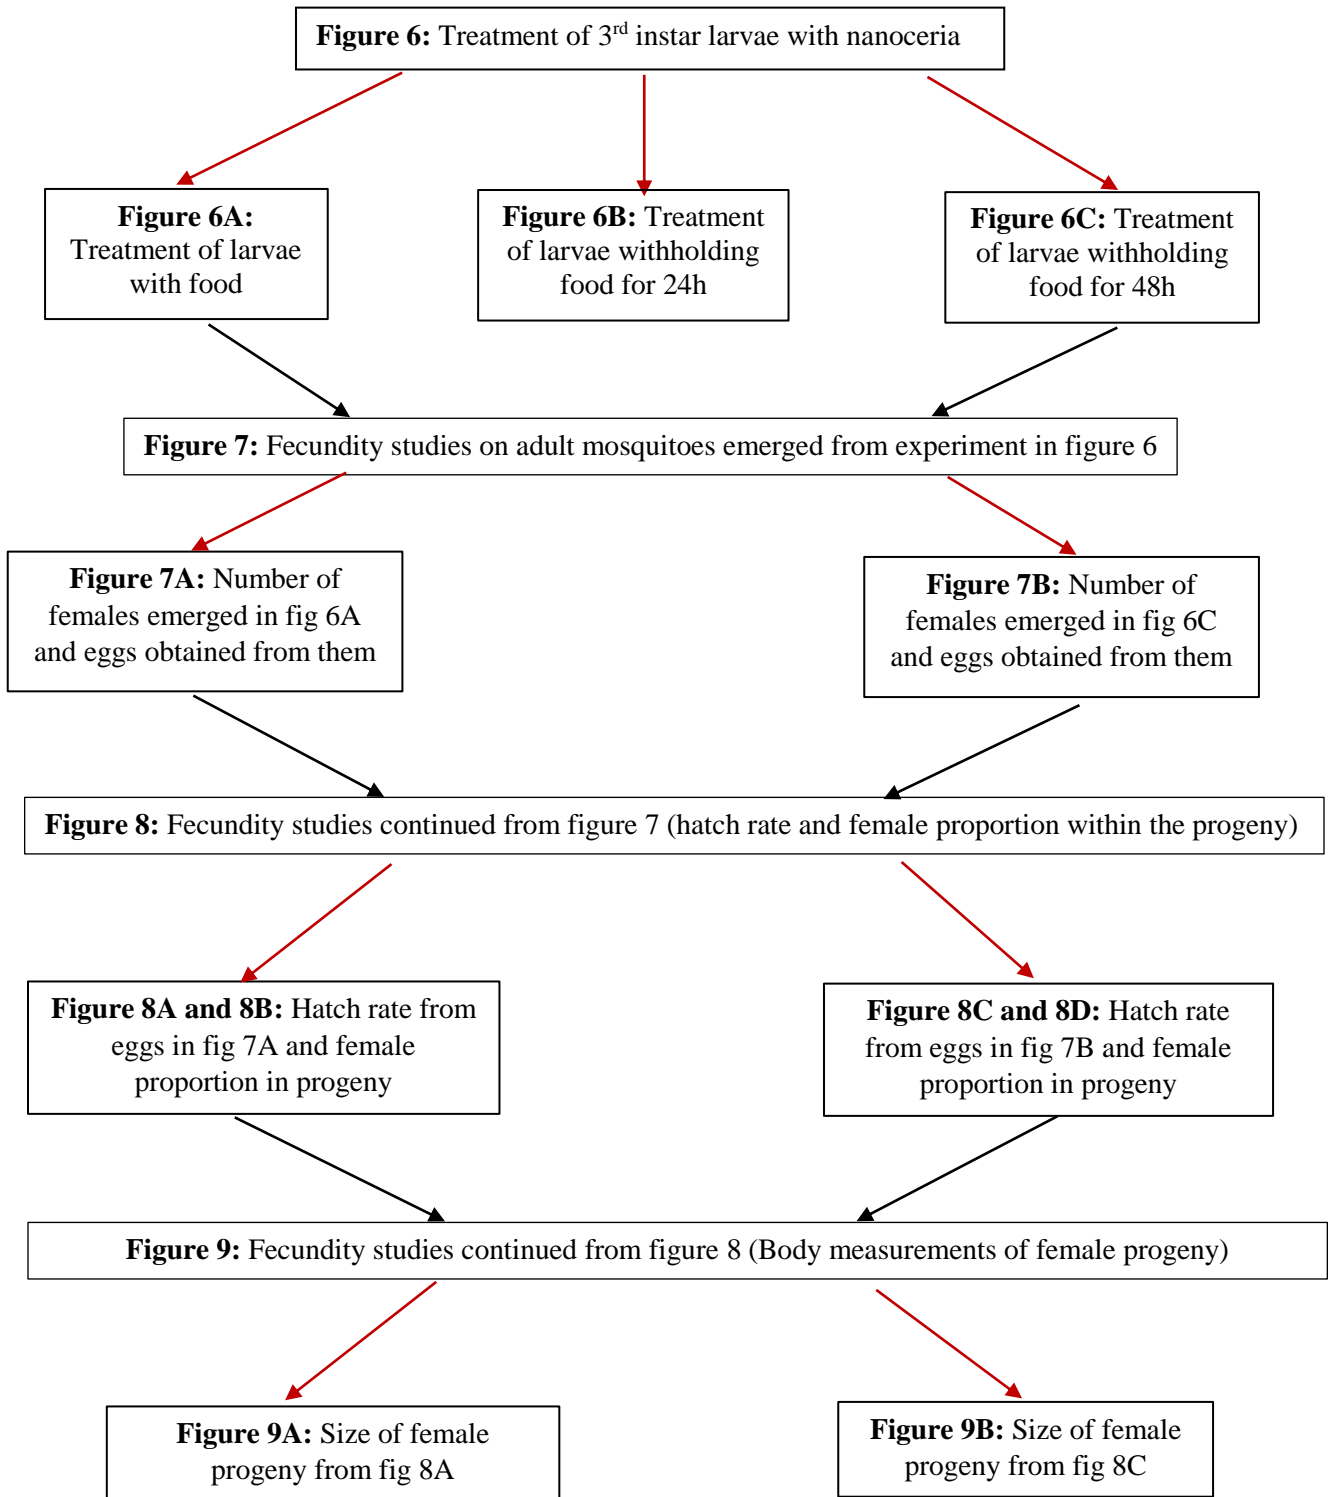

Supplement: pntd.0008654.s001.pdf [file pntd.0008654.s001.pdf]
