# Supplementary material for: Exposure to nanoceria impacts larval survival, life history traits and fecundity of Aedes aegypti
Source: PubMed Central journal article supplement (PMC7540862; doi:10.1371/journal.pntd.0008654), 2020-09-25
Supplement: pntd.0008654.s003.pdf [file pntd.0008654.s003.pdf]

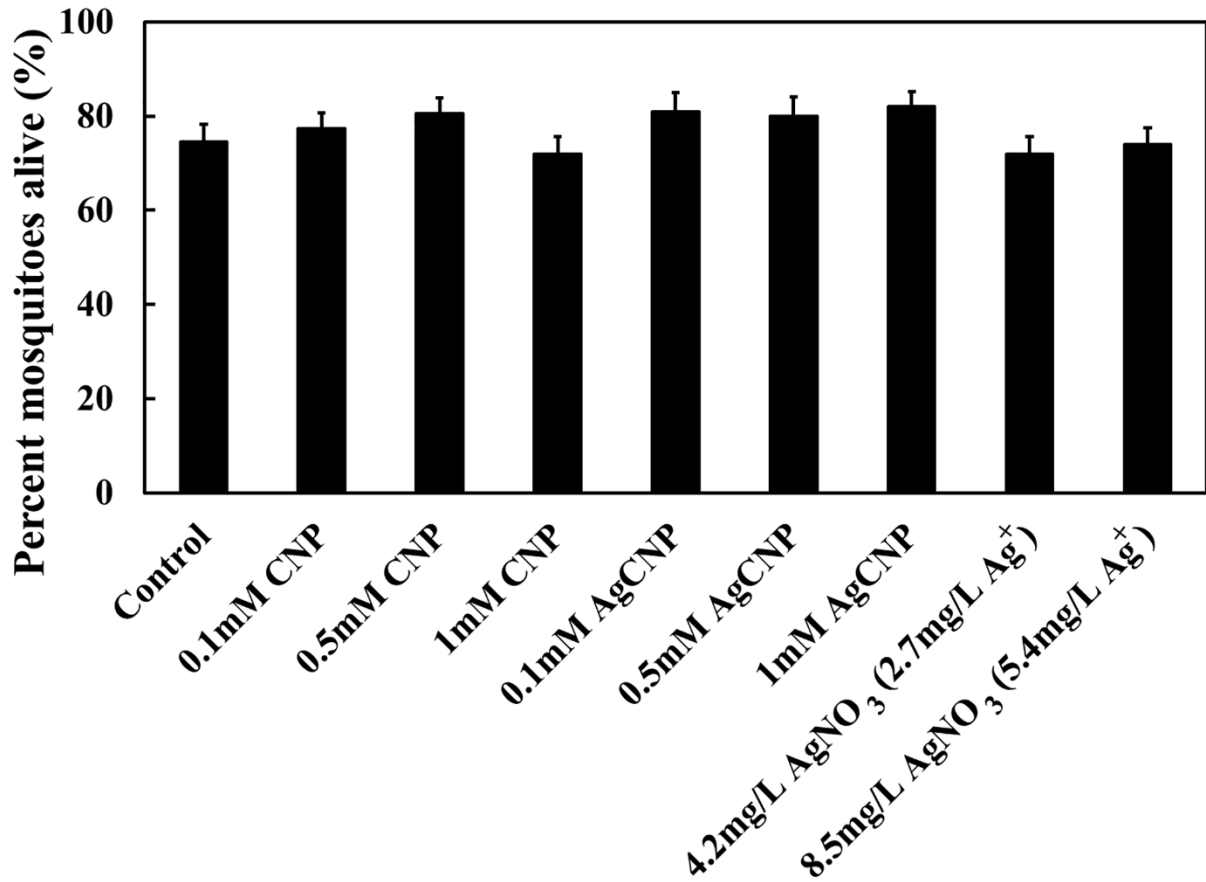

**Adulticidal effects of nanoparticles on *Ae. aegypti* female mosquitoes.** Adult *Ae. aegypti* females were fed sugar-based feeding solutions with varying concentrations of nanocerria. None of the mean proportions of the mosquitoes alive in any group were significantly different from each other. Experiment was performed with 2-3 cups of 50 mosquitoes each for each experimental condition. Error bars = SEP.
