# Supplementary material for: Exposure to nanoceria impacts larval survival, life history traits and fecundity of Aedes aegypti
Source: PubMed Central journal article supplement (PMC7540862; doi:10.1371/journal.pntd.0008654), 2020-09-25
Supplement: pntd.0008654.s005.pdf [file pntd.0008654.s005.pdf]

## Figure supplementary 1-% Adult Mosquitos Alive;

The FREQ Procedure

| Frequency<br>Col Pct | ALI<br>VE | Table of ALIVE by GROUP    |                 |                            |                 |                          |               |                 |                 |             |           |
|----------------------|-----------|----------------------------|-----------------|----------------------------|-----------------|--------------------------|---------------|-----------------|-----------------|-------------|-----------|
|                      |           | GROUP                      |                 |                            |                 |                          |               |                 |                 |             |           |
|                      |           | 0.1mM_A<br>gCNP-1-<br>10-T | 0.1mM_<br>CNP-T | 0.5mM_A<br>gCNP-1-<br>10-T | 0.5mM_<br>CNP-T | 1mM_Ag<br>CNP-1-<br>10-T | 1mM_<br>CNP-T | 4mg/L_A<br>gNO3 | 8mg/L_A<br>gNO3 | Cont<br>rol | Tot<br>al |
| Yes                  |           | 81                         | 116             | 80                         | 121             | 123                      | 108           | 108             | 111             | 112         | 96        |
|                      |           | 81.00                      | 77.33           | 80.00                      | 80.67           | 82.00                    | 72.00         | 72.00           | 74.00           | 74.6        | 0         |
|                      |           |                            |                 |                            |                 |                          |               |                 |                 | 7           |           |
| No                   |           | 19                         | 34              | 20                         | 29              | 27                       | 42            | 42              | 39              | 38          | 29        |
|                      |           | 19.00                      | 22.67           | 20.00                      | 19.33           | 18.00                    | 28.00         | 28.00           | 26.00           | 25.3        | 0         |
|                      |           |                            |                 |                            |                 |                          |               |                 |                 | 3           |           |
| Total                |           | 100                        | 150             | 100                        | 150             | 150                      | 150           | 150             | 150             | 150         | 12        |
|                      |           |                            |                 |                            |                 |                          |               |                 |                 |             | 50        |

### Statistics for Table of ALIVE by GROUP

| Statistic                   | DF | Value   | Prob   |
|-----------------------------|----|---------|--------|
| Chi-Square                  | 8  | 10.0462 | 0.2618 |
| Likelihood Ratio Chi-Square | 8  | 10.1105 | 0.2574 |
| Mantel-Haenszel Chi-Square  | 1  | 4.3478  | 0.0371 |
| Phi Coefficient             |    | 0.0896  |        |
| Contingency Coefficient     |    | 0.0893  |        |
| Cramer's V                  |    | 0.0896  |        |

## Proportion Alive with SE by Group

The FREQ Procedure

GROUP=0.1mM\_AgCNP-1-10-T

| <b>ALIVE</b> | <b>Frequency</b> | <b>Percent</b> | <b>Cumulative<br/>Frequency</b> | <b>Cumulative<br/>Percent</b> |
|--------------|------------------|----------------|---------------------------------|-------------------------------|
| <b>Yes</b>   | 81               | 81.00          | 81                              | 81.00                         |
| <b>No</b>    | 19               | 19.00          | 100                             | 100.00                        |

### Binomial Proportion

**ALIVE = Yes**

|                             |        |
|-----------------------------|--------|
| <b>Proportion</b>           | 0.8100 |
| <b>ASE</b>                  | 0.0392 |
| <b>95% Lower Conf Limit</b> | 0.7331 |
| <b>95% Upper Conf Limit</b> | 0.8869 |

### Exact Conf Limits

|                             |        |
|-----------------------------|--------|
| <b>95% Lower Conf Limit</b> | 0.7193 |
| <b>95% Upper Conf Limit</b> | 0.8816 |

### Test of H0: Proportion = 0.5

|                              |        |
|------------------------------|--------|
| <b>ASE under H0</b>          | 0.0500 |
| <b>Z</b>                     | 6.2000 |
| <b>One-sided Pr &gt; Z</b>   | <.0001 |
| <b>Two-sided Pr &gt;  Z </b> | <.0001 |

**Sample Size = 100**

Proportion Alive with SE by Group

The FREQ Procedure  
GROUP=0.1mM\_CNP-T

| <b>ALIVE</b> | <b>Frequency</b> | <b>Percent</b> | <b>Cumulative<br/>Frequency</b> | <b>Cumulative<br/>Percent</b> |
|--------------|------------------|----------------|---------------------------------|-------------------------------|
| <b>Yes</b>   | 116              | 77.33          | 116                             | 77.33                         |
| <b>No</b>    | 34               | 22.67          | 150                             | 100.00                        |

**Binomial Proportion**

**ALIVE = Yes**

|                             |        |
|-----------------------------|--------|
| <b>Proportion</b>           | 0.7733 |
| <b>ASE</b>                  | 0.0342 |
| <b>95% Lower Conf Limit</b> | 0.7063 |
| <b>95% Upper Conf Limit</b> | 0.8403 |

**Exact Conf Limits**

|                             |        |
|-----------------------------|--------|
| <b>95% Lower Conf Limit</b> | 0.6979 |
| <b>95% Upper Conf Limit</b> | 0.8376 |

**Test of H0: Proportion = 0.5**

|                              |        |
|------------------------------|--------|
| <b>ASE under H0</b>          | 0.0408 |
| <b>Z</b>                     | 6.6953 |
| <b>One-sided Pr &gt; Z</b>   | <.0001 |
| <b>Two-sided Pr &gt;  Z </b> | <.0001 |

**Sample Size = 150**

Proportion Alive with SE by Group

The FREQ Procedure  
GROUP=0.5mM\_AgCNP-1-10-T

| <b>ALIVE</b> | <b>Frequency</b> | <b>Percent</b> | <b>Cumulative<br/>Frequency</b> | <b>Cumulative<br/>Percent</b> |
|--------------|------------------|----------------|---------------------------------|-------------------------------|
| <b>Yes</b>   | 80               | 80.00          | 80                              | 80.00                         |
| <b>No</b>    | 20               | 20.00          | 100                             | 100.00                        |

**Binomial Proportion**

**ALIVE = Yes**

|                             |        |
|-----------------------------|--------|
| <b>Proportion</b>           | 0.8000 |
| <b>ASE</b>                  | 0.0400 |
| <b>95% Lower Conf Limit</b> | 0.7216 |
| <b>95% Upper Conf Limit</b> | 0.8784 |

**Exact Conf Limits**

|                             |        |
|-----------------------------|--------|
| <b>95% Lower Conf Limit</b> | 0.7082 |
| <b>95% Upper Conf Limit</b> | 0.8733 |

**Test of H0: Proportion = 0.5**

|                              |        |
|------------------------------|--------|
| <b>ASE under H0</b>          | 0.0500 |
| <b>Z</b>                     | 6.0000 |
| <b>One-sided Pr &gt; Z</b>   | <.0001 |
| <b>Two-sided Pr &gt;  Z </b> | <.0001 |

**Sample Size = 100**

Proportion Alive with SE by Group

The FREQ Procedure  
GROUP=0.5mM\_CNP-T

| <b>ALIVE</b> | <b>Frequency</b> | <b>Percent</b> | <b>Cumulative<br/>Frequency</b> | <b>Cumulative<br/>Percent</b> |
|--------------|------------------|----------------|---------------------------------|-------------------------------|
| <b>Yes</b>   | 121              | 80.67          | 121                             | 80.67                         |
| <b>No</b>    | 29               | 19.33          | 150                             | 100.00                        |

**Binomial Proportion**

**ALIVE = Yes**

|                             |        |
|-----------------------------|--------|
| <b>Proportion</b>           | 0.8067 |
| <b>ASE</b>                  | 0.0322 |
| <b>95% Lower Conf Limit</b> | 0.7435 |
| <b>95% Upper Conf Limit</b> | 0.8699 |

**Exact Conf Limits**

|                             |        |
|-----------------------------|--------|
| <b>95% Lower Conf Limit</b> | 0.7343 |
| <b>95% Upper Conf Limit</b> | 0.8665 |

**Test of H0: Proportion = 0.5**

|                              |        |
|------------------------------|--------|
| <b>ASE under H0</b>          | 0.0408 |
| <b>Z</b>                     | 7.5118 |
| <b>One-sided Pr &gt; Z</b>   | <.0001 |
| <b>Two-sided Pr &gt;  Z </b> | <.0001 |

**Sample Size = 150**

Proportion Alive with SE by Group

The FREQ Procedure  
GROUP=1mM\_AgCNP-1-10-T

| <b>ALIVE</b> | <b>Frequency</b> | <b>Percent</b> | <b>Cumulative<br/>Frequency</b> | <b>Cumulative<br/>Percent</b> |
|--------------|------------------|----------------|---------------------------------|-------------------------------|
| <b>Yes</b>   | 123              | 82.00          | 123                             | 82.00                         |
| <b>No</b>    | 27               | 18.00          | 150                             | 100.00                        |

**Binomial Proportion**

**ALIVE = Yes**

|                             |        |
|-----------------------------|--------|
| <b>Proportion</b>           | 0.8200 |
| <b>ASE</b>                  | 0.0314 |
| <b>95% Lower Conf Limit</b> | 0.7585 |
| <b>95% Upper Conf Limit</b> | 0.8815 |

**Exact Conf Limits**

|                             |        |
|-----------------------------|--------|
| <b>95% Lower Conf Limit</b> | 0.7490 |
| <b>95% Upper Conf Limit</b> | 0.8779 |

**Test of H0: Proportion = 0.5**

|                              |        |
|------------------------------|--------|
| <b>ASE under H0</b>          | 0.0408 |
| <b>Z</b>                     | 7.8384 |
| <b>One-sided Pr &gt; Z</b>   | <.0001 |
| <b>Two-sided Pr &gt;  Z </b> | <.0001 |

**Sample Size = 150**

Proportion Alive with SE by Group

The FREQ Procedure  
GROUP=1mM\_CNP-T

| <b>ALIVE</b> | <b>Frequency</b> | <b>Percent</b> | <b>Cumulative<br/>Frequency</b> | <b>Cumulative<br/>Percent</b> |
|--------------|------------------|----------------|---------------------------------|-------------------------------|
| <b>Yes</b>   | 108              | 72.00          | 108                             | 72.00                         |
| <b>No</b>    | 42               | 28.00          | 150                             | 100.00                        |

**Binomial Proportion**

**ALIVE = Yes**

|                             |        |
|-----------------------------|--------|
| <b>Proportion</b>           | 0.7200 |
| <b>ASE</b>                  | 0.0367 |
| <b>95% Lower Conf Limit</b> | 0.6481 |
| <b>95% Upper Conf Limit</b> | 0.7919 |

**Exact Conf Limits**

|                             |        |
|-----------------------------|--------|
| <b>95% Lower Conf Limit</b> | 0.6409 |
| <b>95% Upper Conf Limit</b> | 0.7902 |

**Test of H0: Proportion = 0.5**

|                              |        |
|------------------------------|--------|
| <b>ASE under H0</b>          | 0.0408 |
| <b>Z</b>                     | 5.3889 |
| <b>One-sided Pr &gt; Z</b>   | <.0001 |
| <b>Two-sided Pr &gt;  Z </b> | <.0001 |

**Sample Size = 150**

Proportion Alive with SE by Group

The FREQ Procedure  
GROUP=4mg/L\_AgNO3

| <b>ALIVE</b> | <b>Frequency</b> | <b>Percent</b> | <b>Cumulative<br/>Frequency</b> | <b>Cumulative<br/>Percent</b> |
|--------------|------------------|----------------|---------------------------------|-------------------------------|
| <b>Yes</b>   | 108              | 72.00          | 108                             | 72.00                         |
| <b>No</b>    | 42               | 28.00          | 150                             | 100.00                        |

**Binomial Proportion**

**ALIVE = Yes**

|                             |        |
|-----------------------------|--------|
| <b>Proportion</b>           | 0.7200 |
| <b>ASE</b>                  | 0.0367 |
| <b>95% Lower Conf Limit</b> | 0.6481 |
| <b>95% Upper Conf Limit</b> | 0.7919 |

**Exact Conf Limits**

|                             |        |
|-----------------------------|--------|
| <b>95% Lower Conf Limit</b> | 0.6409 |
| <b>95% Upper Conf Limit</b> | 0.7902 |

**Test of H0: Proportion = 0.5**

|                              |        |
|------------------------------|--------|
| <b>ASE under H0</b>          | 0.0408 |
| <b>Z</b>                     | 5.3889 |
| <b>One-sided Pr &gt; Z</b>   | <.0001 |
| <b>Two-sided Pr &gt;  Z </b> | <.0001 |

**Sample Size = 150**



Proportion Alive with SE by Group

The FREQ Procedure  
GROUP=8mg/L\_AgNO3

| <b>ALIVE</b> | <b>Frequency</b> | <b>Percent</b> | <b>Cumulative<br/>Frequency</b> | <b>Cumulative<br/>Percent</b> |
|--------------|------------------|----------------|---------------------------------|-------------------------------|
| <b>Yes</b>   | 111              | 74.00          | 111                             | 74.00                         |
| <b>No</b>    | 39               | 26.00          | 150                             | 100.00                        |

**Binomial Proportion**

**ALIVE = Yes**

|                             |        |
|-----------------------------|--------|
| <b>Proportion</b>           | 0.7400 |
| <b>ASE</b>                  | 0.0358 |
| <b>95% Lower Conf Limit</b> | 0.6698 |
| <b>95% Upper Conf Limit</b> | 0.8102 |

**Exact Conf Limits**

|                             |        |
|-----------------------------|--------|
| <b>95% Lower Conf Limit</b> | 0.6621 |
| <b>95% Upper Conf Limit</b> | 0.8081 |

**Test of H0: Proportion = 0.5**

|                              |        |
|------------------------------|--------|
| <b>ASE under H0</b>          | 0.0408 |
| <b>Z</b>                     | 5.8788 |
| <b>One-sided Pr &gt; Z</b>   | <.0001 |
| <b>Two-sided Pr &gt;  Z </b> | <.0001 |

**Sample Size = 150**

Proportion Alive with SE by Group

The FREQ Procedure  
GROUP=Control

| <b>ALIVE</b> | <b>Frequency</b> | <b>Percent</b> | <b>Cumulative<br/>Frequency</b> | <b>Cumulative<br/>Percent</b> |
|--------------|------------------|----------------|---------------------------------|-------------------------------|
| <b>Yes</b>   | 112              | 74.67          | 112                             | 74.67                         |
| <b>No</b>    | 38               | 25.33          | 150                             | 100.00                        |

**Binomial Proportion**

**ALIVE = Yes**

|                             |        |
|-----------------------------|--------|
| <b>Proportion</b>           | 0.7467 |
| <b>ASE</b>                  | 0.0355 |
| <b>95% Lower Conf Limit</b> | 0.6771 |
| <b>95% Upper Conf Limit</b> | 0.8163 |

**Exact Conf Limits**

|                             |        |
|-----------------------------|--------|
| <b>95% Lower Conf Limit</b> | 0.6693 |
| <b>95% Upper Conf Limit</b> | 0.8141 |

**Test of H0: Proportion = 0.5**

|                              |        |
|------------------------------|--------|
| <b>ASE under H0</b>          | 0.0408 |
| <b>Z</b>                     | 6.0421 |
| <b>One-sided Pr &gt; Z</b>   | <.0001 |
| <b>Two-sided Pr &gt;  Z </b> | <.0001 |

**Sample Size = 150**
