# Supplementary material for: Exposure to nanoceria impacts larval survival, life history traits and fecundity of Aedes aegypti
Source: PubMed Central journal article supplement (PMC7540862; doi:10.1371/journal.pntd.0008654), 2020-09-25
Supplement: pntd.0008654.s006.pdf [file pntd.0008654.s006.pdf]

## Figure 6a- % Adults Emerged by Group;

Chi-Square Analysis for a 2x4 Figure

The FREQ Procedure

|              |         | Figure of EMERGED by GROUP |       |       |        |       |
|--------------|---------|----------------------------|-------|-------|--------|-------|
| Frequency    | EMERGED | GROUP                      |       |       |        |       |
| Col Pct      |         | Control                    | CNP   | AgCNP | AgNO3  | Total |
| Yes          |         | 291                        | 269   | 225   | 0      | 785   |
|              |         | 88.18                      | 81.52 | 68.18 | 0.00   |       |
| No           |         | 39                         | 61    | 105   | 330    | 535   |
|              |         | 11.82                      | 18.48 | 31.82 | 100.00 |       |
| <b>Total</b> |         | 330                        | 330   | 330   | 330    | 1320  |

### Statistics for Figure of EMERGED by GROUP

| Statistic                   | DF | Value    | Prob   |
|-----------------------------|----|----------|--------|
| Chi-Square                  | 3  | 674.0038 | <.0001 |
| Likelihood Ratio Chi-Square | 3  | 813.7595 | <.0001 |
| Mantel-Haenszel Chi-Square  | 1  | 528.1898 | <.0001 |
| Phi Coefficient             |    | 0.7146   |        |
| Contingency Coefficient     |    | 0.5814   |        |
| Cramer's V                  |    | 0.7146   |        |

Sample Size = 1320

Proportion Emerged with SE by Group

The FREQ Procedure

GROUP=1=Contro

| <b>EMERGED</b> | <b>Frequency</b> | <b>Percent</b> | <b>Cumulative<br/>Frequency</b> | <b>Cumulative<br/>Percent</b> |
|----------------|------------------|----------------|---------------------------------|-------------------------------|
| <b>Yes</b>     | 291              | 88.18          | 291                             | 88.18                         |
| <b>No</b>      | 39               | 11.82          | 330                             | 100.00                        |

**Binomial Proportion**

**EMERGED = Yes**

|                             |        |
|-----------------------------|--------|
| <b>Proportion</b>           | 0.8818 |
| <b>ASE</b>                  | 0.0178 |
| <b>95% Lower Conf Limit</b> | 0.8470 |
| <b>95% Upper Conf Limit</b> | 0.9166 |

**Exact Conf Limits**

|                             |        |
|-----------------------------|--------|
| <b>95% Lower Conf Limit</b> | 0.8420 |
| <b>95% Upper Conf Limit</b> | 0.9146 |

**Test of H0: Proportion = 0.5**

|                              |         |
|------------------------------|---------|
| <b>ASE under H0</b>          | 0.0275  |
| <b>Z</b>                     | 13.8721 |
| <b>One-sided Pr &gt; Z</b>   | <.0001  |
| <b>Two-sided Pr &gt;  Z </b> | <.0001  |

**Sample Size = 330**

Proportion Emerged with SE by Group

The FREQ Procedure  
GROUP=2=CNP

| <b>EMERGED</b> | <b>Frequency</b> | <b>Percent</b> | <b>Cumulative<br/>Frequency</b> | <b>Cumulative<br/>Percent</b> |
|----------------|------------------|----------------|---------------------------------|-------------------------------|
| <b>Yes</b>     | 269              | 81.52          | 269                             | 81.52                         |
| <b>No</b>      | 61               | 18.48          | 330                             | 100.00                        |

**Binomial Proportion**

**EMERGED = Yes**

|                             |        |
|-----------------------------|--------|
| <b>Proportion</b>           | 0.8152 |
| <b>ASE</b>                  | 0.0214 |
| <b>95% Lower Conf Limit</b> | 0.7733 |
| <b>95% Upper Conf Limit</b> | 0.8570 |

**Exact Conf Limits**

|                             |        |
|-----------------------------|--------|
| <b>95% Lower Conf Limit</b> | 0.7690 |
| <b>95% Upper Conf Limit</b> | 0.8556 |

**Test of H0: Proportion = 0.5**

|                              |         |
|------------------------------|---------|
| <b>ASE under H0</b>          | 0.0275  |
| <b>Z</b>                     | 11.4500 |
| <b>One-sided Pr &gt; Z</b>   | <.0001  |
| <b>Two-sided Pr &gt;  Z </b> | <.0001  |

**Sample Size = 330**

Proportion Emerged with SE by Group

The FREQ Procedure  
GROUP=3=AgCNP

| <b>EMERGED</b> | <b>Frequency</b> | <b>Percent</b> | <b>Cumulative<br/>Frequency</b> | <b>Cumulative<br/>Percent</b> |
|----------------|------------------|----------------|---------------------------------|-------------------------------|
| <b>Yes</b>     | 225              | 68.18          | 225                             | 68.18                         |
| <b>No</b>      | 105              | 31.82          | 330                             | 100.00                        |

**Binomial Proportion**

**EMERGED = Yes**

|                             |        |
|-----------------------------|--------|
| <b>Proportion</b>           | 0.6818 |
| <b>ASE</b>                  | 0.0256 |
| <b>95% Lower Conf Limit</b> | 0.6316 |
| <b>95% Upper Conf Limit</b> | 0.7321 |

**Exact Conf Limits**

|                             |        |
|-----------------------------|--------|
| <b>95% Lower Conf Limit</b> | 0.6286 |
| <b>95% Upper Conf Limit</b> | 0.7318 |

**Sample Size = 330**

Proportion Emerged with SE by Group

The FREQ Procedure  
GROUP=4=AgNO3

| <b>EMERGED</b> | <b>Frequency</b> | <b>Percent</b> | <b>Cumulative<br/>Frequency</b> | <b>Cumulative<br/>Percent</b> |
|----------------|------------------|----------------|---------------------------------|-------------------------------|
| No             | 330              | 100.00         | 330                             | 100.00                        |

**Binomial Proportion**

**EMERGED = No**

|                             |        |
|-----------------------------|--------|
| <b>Proportion</b>           | 1.0000 |
| <b>ASE</b>                  | 0.0000 |
| <b>95% Lower Conf Limit</b> | 1.0000 |
| <b>95% Upper Conf Limit</b> | 1.0000 |

**Exact Conf Limits**

|                             |        |
|-----------------------------|--------|
| <b>95% Lower Conf Limit</b> | 0.9889 |
| <b>95% Upper Conf Limit</b> | 1.0000 |

**Sample Size = 330**

## Tukey Style Multiple Comparisons of Proportions

Compare Diff SE q **q(.05)** Conclude

| Compare | Diff  | SE   | q     | <b>q(.05)</b> | Conclude |
|---------|-------|------|-------|---------------|----------|
| 1 vs 4  | 67.65 | 1.58 | 42.82 | 3.633         | R        |
| 1 vs 3  | 14.17 | 1.58 | 8.97  | 3.633         | R        |
| 1 vs 2  | 5.33  | 1.58 | 3.37  | 3.633         | A        |
| 2 vs 4  | 62.33 | 1.58 | 39.45 | 3.633         | R        |
| 2 vs 3  | 8.84  | 1.58 | 5.59  | 3.633         | R        |
| 3 vs 4  | 53.49 | 1.58 | 33.85 | 3.633         | R        |

Reference: Biostatistical Analysis, Fourth Edition, Jerrold Zar, 1999, p564.

## Tukey Style Multiple Comparisons of Proportions

Compare Diff SE q **q(.01)** Conclude

| Compare | Diff  | SE   | q     | <b>q(.01)</b> | Conclude |
|---------|-------|------|-------|---------------|----------|
| 1 vs 4  | 67.65 | 1.58 | 42.82 | 4.403         | R        |
| 1 vs 3  | 14.17 | 1.58 | 8.97  | 4.403         | R        |
| 1 vs 2  | 5.33  | 1.58 | 3.37  | 4.403         | A        |
| 2 vs 4  | 62.33 | 1.58 | 39.45 | 4.403         | R        |
| 2 vs 3  | 8.84  | 1.58 | 5.59  | 4.403         | R        |
| 3 vs 4  | 53.49 | 1.58 | 33.85 | 4.403         | R        |

Reference: Biostatistical Analysis, Fourth Edition, Jerrold Zar, 1999, p564.

## Tukey Style Multiple Comparisons of Proportions

Compare Diff SE q **q(.001)** Conclude

| Compare | Diff  | SE   | q     | <b>q(.001)</b> | Conclude |
|---------|-------|------|-------|----------------|----------|
| 1 vs 4  | 67.65 | 1.58 | 42.82 | 5.309          | R        |
| 1 vs 3  | 14.17 | 1.58 | 8.97  | 5.309          | R        |
| 1 vs 2  | 5.33  | 1.58 | 3.37  | 5.309          | A        |
| 2 vs 4  | 62.33 | 1.58 | 39.45 | 5.309          | R        |
| 2 vs 3  | 8.84  | 1.58 | 5.59  | 5.309          | R        |
| 3 vs 4  | 53.49 | 1.58 | 33.85 | 5.309          | R        |

Reference: Biostatistical Analysis, Fourth Edition, Jerrold Zar, 1999, p564.

**Figure 6a- % Larvae dead by Group;**

|                      |             | Figure of LARVAE_DEAD by GROUP |       |       |       |       |
|----------------------|-------------|--------------------------------|-------|-------|-------|-------|
| Frequency<br>Col Pct | LARVAE_DEAD | GROUP                          |       |       |       | Total |
|                      |             | Control                        | CNP   | AgCNP | AgNO3 |       |
| Yes                  |             | 22                             | 45    | 83    | 269   | 419   |
|                      |             | 6.67                           | 13.64 | 25.15 | 81.52 |       |
| No                   |             | 308                            | 285   | 247   | 61    | 901   |
|                      |             | 93.33                          | 86.36 | 74.85 | 18.48 |       |
| <b>Total</b>         |             | 330                            | 330   | 330   | 330   | 1320  |

#### Statistics for Figure of LARVAE\_DEAD by GROUP

| Statistic                   | DF | Value    | Prob   |
|-----------------------------|----|----------|--------|
| Chi-Square                  | 3  | 529.6343 | <.0001 |
| Likelihood Ratio Chi-Square | 3  | 537.0773 | <.0001 |
| Mantel-Haenszel Chi-Square  | 1  | 424.0440 | <.0001 |
| Phi Coefficient             |    | 0.6334   |        |
| Contingency Coefficient     |    | 0.5351   |        |
| Cramer's V                  |    | 0.6334   |        |

Sample Size = 1320

Larvae Dead with SE by Group

The FREQ Procedure  
GROUP=1=Contro

| <b>LARVAE_DEAD</b> | <b>Frequency</b> | <b>Percent</b> | <b>Cumulative<br/>Frequency</b> | <b>Cumulative<br/>Percent</b> |
|--------------------|------------------|----------------|---------------------------------|-------------------------------|
| <b>Yes</b>         | 22               | 6.67           | 22                              | 6.67                          |
| <b>No</b>          | 308              | 93.33          | 330                             | 100.00                        |

### **Binomial Proportion**

**LARVAE\_DEAD = Yes**

**Proportion** 0.0667

**ASE** 0.0137

**95% Lower Conf Limit** 0.0398

**95% Upper Conf Limit** 0.0936

### **Exact Conf Limits**

**95% Lower Conf Limit** 0.0422

**95% Upper Conf Limit** 0.0992

### **Test of H0: Proportion = 0.5**

**ASE under H0** 0.0275

**Z** -15.7438

**One-sided Pr < Z** <.0001

**Two-sided Pr > |Z|** <.0001

**Sample Size = 330**



Larvae Dead with SE by Group

The FREQ Procedure

GROUP=2=CNP

| <b>LARVAE_DEAD</b> | <b>Frequency</b> | <b>Percent</b> | <b>Cumulative<br/>Frequency</b> | <b>Cumulative<br/>Percent</b> |
|--------------------|------------------|----------------|---------------------------------|-------------------------------|
| <b>Yes</b>         | 45               | 13.64          | 45                              | 13.64                         |
| <b>No</b>          | 285              | 86.36          | 330                             | 100.00                        |

**Binomial Proportion**

**LARVAE\_DEAD = Yes**

|                             |        |
|-----------------------------|--------|
| <b>Proportion</b>           | 0.1364 |
| <b>ASE</b>                  | 0.0189 |
| <b>95% Lower Conf Limit</b> | 0.0993 |
| <b>95% Upper Conf Limit</b> | 0.1734 |

**Exact Conf Limits**

|                             |        |
|-----------------------------|--------|
| <b>95% Lower Conf Limit</b> | 0.1012 |
| <b>95% Upper Conf Limit</b> | 0.1782 |

**Test of H0: Proportion = 0.5**

|                              |          |
|------------------------------|----------|
| <b>ASE under H0</b>          | 0.0275   |
| <b>Z</b>                     | -13.2116 |
| <b>One-sided Pr &lt; Z</b>   | <.0001   |
| <b>Two-sided Pr &gt;  Z </b> | <.0001   |

**Sample Size = 330**

Larvae Dead with SE by Group

The FREQ Procedure  
GROUP=3=AgCNP

| LARVAE_DEAD | Frequency | Percent | Cumulative<br>Frequency | Cumulative<br>Percent |
|-------------|-----------|---------|-------------------------|-----------------------|
| Yes         | 83        | 25.15   | 83                      | 25.15                 |
| No          | 247       | 74.85   | 330                     | 100.00                |

**Binomial Proportion**

**LARVAE\_DEAD = Yes**

|                             |        |
|-----------------------------|--------|
| <b>Proportion</b>           | 0.2515 |
| <b>ASE</b>                  | 0.0239 |
| <b>95% Lower Conf Limit</b> | 0.2047 |
| <b>95% Upper Conf Limit</b> | 0.2983 |

**Exact Conf Limits**

|                             |        |
|-----------------------------|--------|
| <b>95% Lower Conf Limit</b> | 0.2056 |
| <b>95% Upper Conf Limit</b> | 0.3019 |

**Test of H0: Proportion = 0.5**

|                              |         |
|------------------------------|---------|
| <b>ASE under H0</b>          | 0.0275  |
| <b>Z</b>                     | -9.0279 |
| <b>One-sided Pr &lt; Z</b>   | <.0001  |
| <b>Two-sided Pr &gt;  Z </b> | <.0001  |

**Sample Size = 330**

Larvae Dead with SE by Group

The FREQ Procedure

GROUP=4=AgNO3

| <b>LARVAE_DEAD</b> | <b>Frequency</b> | <b>Percent</b> | <b>Cumulative<br/>Frequency</b> | <b>Cumulative<br/>Percent</b> |
|--------------------|------------------|----------------|---------------------------------|-------------------------------|
| <b>Yes</b>         | 269              | 81.52          | 269                             | 81.52                         |
| <b>No</b>          | 61               | 18.48          | 330                             | 100.00                        |

**Binomial Proportion**

**LARVAE\_DEAD = Yes**

|                             |        |
|-----------------------------|--------|
| <b>Proportion</b>           | 0.8152 |
| <b>ASE</b>                  | 0.0214 |
| <b>95% Lower Conf Limit</b> | 0.7733 |
| <b>95% Upper Conf Limit</b> | 0.8570 |

**Exact Conf Limits**

|                             |        |
|-----------------------------|--------|
| <b>95% Lower Conf Limit</b> | 0.7690 |
| <b>95% Upper Conf Limit</b> | 0.8556 |

**Test of H0: Proportion = 0.5**

|                              |         |
|------------------------------|---------|
| <b>ASE under H0</b>          | 0.0275  |
| <b>Z</b>                     | 11.4500 |
| <b>One-sided Pr &gt; Z</b>   | <.0001  |
| <b>Two-sided Pr &gt;  Z </b> | <.0001  |

**Sample Size = 330**

Chi-Square Analysis for a 2x4 Figure

Tukey Style Multiple Comparisons of Proportions

Compare Diff SE q **q(.05)** Conclude

| Compare | Diff  | SE   | q     | <b>q(.05)</b> | Conclude |
|---------|-------|------|-------|---------------|----------|
| 4 vs 1  | 49.36 | 1.58 | 31.24 | 3.633         | R        |
| 4 vs 2  | 42.71 | 1.58 | 27.03 | 3.633         | R        |
| 4 vs 3  | 34.32 | 1.58 | 21.72 | 3.633         | R        |
| 3 vs 1  | 15.04 | 1.58 | 9.52  | 3.633         | R        |
| 3 vs 2  | 8.39  | 1.58 | 5.31  | 3.633         | R        |
| 2 vs 1  | 6.65  | 1.58 | 4.21  | 3.633         | R        |

Reference: Biostatistical Analysis, Fourth Edition, Jerrold Zar, 1999, p564.

Chi-Square Analysis for a 2x4 Figure

Tukey Style Multiple Comparisons of Proportions

Compare Diff SE q **q(.01)** Conclude

| Compare | Diff  | SE   | q     | <b>q(.01)</b> | Conclude |
|---------|-------|------|-------|---------------|----------|
| 4 vs 1  | 49.36 | 1.58 | 31.24 | 4.403         | R        |
| 4 vs 2  | 42.71 | 1.58 | 27.03 | 4.403         | R        |
| 4 vs 3  | 34.32 | 1.58 | 21.72 | 4.403         | R        |
| 3 vs 1  | 15.04 | 1.58 | 9.52  | 4.403         | R        |
| 3 vs 2  | 8.39  | 1.58 | 5.31  | 4.403         | R        |
| 2 vs 1  | 6.65  | 1.58 | 4.21  | 4.403         | A        |

Reference: Biostatistical Analysis, Fourth Edition, Jerrold Zar, 1999, p564.

Chi-Square Analysis for a 2x4 Figure

Tukey Style Multiple Comparisons of Proportions

Compare Diff SE q **q(.001)** Conclude

| Compare | Diff  | SE   | q     | <b>q(.001)</b> | Conclude |
|---------|-------|------|-------|----------------|----------|
| 4 vs 1  | 49.36 | 1.58 | 31.24 | 5.309          | R        |
| 4 vs 2  | 42.71 | 1.58 | 27.03 | 5.309          | R        |
| 4 vs 3  | 34.32 | 1.58 | 21.72 | 5.309          | R        |
| 3 vs 1  | 15.04 | 1.58 | 9.52  | 5.309          | R        |
| 3 vs 2  | 8.39  | 1.58 | 5.31  | 5.309          | R        |
| 2 vs 1  | 6.65  | 1.58 | 4.21  | 5.309          | A        |

Reference: Biostatistical Analysis, Fourth Edition, Jerrold Zar, 1999, p564.

**Figure 6b- % Adults Emerged by Group;**

Chi-Square Analysis for a 2x4 Figure

The FREQ Procedure

| Frequency<br>Col Pct | EMERGED | Figure of EMERGED by GROUP |                   |       |         |         | Total |
|----------------------|---------|----------------------------|-------------------|-------|---------|---------|-------|
|                      |         | GROUP                      |                   |       |         |         |       |
|                      |         | 1=Control_with             | 2=Control_without | 3=CNP | 4=AgCNP | 5=AgNO3 |       |
| Yes                  |         | 192                        | 150               | 192   | 37      | 0       | 571   |
|                      |         | 91.43                      | 71.43             | 91.43 | 17.62   | 0.00    |       |
| No                   |         | 18                         | 60                | 18    | 173     | 210     | 479   |
|                      |         | 8.57                       | 28.57             | 8.57  | 82.38   | 100.00  |       |
| <b>Total</b>         |         | 210                        | 210               | 210   | 210     | 210     | 1050  |

**Statistics for Figure of EMERGED by GROUP**

| Statistic  | DF | Value    | Prob   |
|------------|----|----------|--------|
| Chi-Square | 4  | 621.7024 | <.0001 |

**Sample Size = 1050**

|                                 |
|---------------------------------|
| Adults Emerged with SE by Group |
|---------------------------------|

The FREQ Procedure  
GROUP=1=Control\_with

| EMERGED | Frequency | Percent | Cumulative<br>Frequency | Cumulative<br>Percent |
|---------|-----------|---------|-------------------------|-----------------------|
| Yes     | 192       | 91.43   | 192                     | 91.43                 |

| <b>EMERGED</b> | <b>Frequency</b> | <b>Percent</b> | <b>Cumulative<br/>Frequency</b> | <b>Cumulative<br/>Percent</b> |
|----------------|------------------|----------------|---------------------------------|-------------------------------|
| <b>No</b>      | 18               | 8.57           | 210                             | 100.00                        |

### **Binomial Proportion**

**EMERGED = Yes**

|                             |        |
|-----------------------------|--------|
| <b>Proportion</b>           | 0.9143 |
| <b>ASE</b>                  | 0.0193 |
| <b>95% Lower Conf Limit</b> | 0.8764 |
| <b>95% Upper Conf Limit</b> | 0.9521 |

### **Exact Conf Limits**

|                             |        |
|-----------------------------|--------|
| <b>95% Lower Conf Limit</b> | 0.8679 |
| <b>95% Upper Conf Limit</b> | 0.9484 |

### **Test of H0: Proportion = 0.5**

|                              |         |
|------------------------------|---------|
| <b>ASE under H0</b>          | 0.0345  |
| <b>Z</b>                     | 12.0071 |
| <b>One-sided Pr &gt; Z</b>   | <.0001  |
| <b>Two-sided Pr &gt;  Z </b> | <.0001  |

**Sample Size = 210**

Adults Emerged with SE by Group

The FREQ Procedure  
GROUP=2=Control\_without

| <b>EMERGED</b> | <b>Frequency</b> | <b>Percent</b> | <b>Cumulative<br/>Frequency</b> | <b>Cumulative<br/>Percent</b> |
|----------------|------------------|----------------|---------------------------------|-------------------------------|
| <b>Yes</b>     | 150              | 71.43          | 150                             | 71.43                         |
| <b>No</b>      | 60               | 28.57          | 210                             | 100.00                        |

**Binomial Proportion**

**EMERGED = Yes**

|                             |        |
|-----------------------------|--------|
| <b>Proportion</b>           | 0.7143 |
| <b>ASE</b>                  | 0.0312 |
| <b>95% Lower Conf Limit</b> | 0.6532 |
| <b>95% Upper Conf Limit</b> | 0.7754 |

**Exact Conf Limits**

|                             |        |
|-----------------------------|--------|
| <b>95% Lower Conf Limit</b> | 0.6481 |
| <b>95% Upper Conf Limit</b> | 0.7743 |

**Test of H0: Proportion = 0.5**

|                              |        |
|------------------------------|--------|
| <b>ASE under H0</b>          | 0.0345 |
| <b>Z</b>                     | 6.2106 |
| <b>One-sided Pr &gt; Z</b>   | <.0001 |
| <b>Two-sided Pr &gt;  Z </b> | <.0001 |

**Sample Size = 210**

## Adults Emerged with SE by Group

The FREQ Procedure

GROUP=3=CNP

| <b>EMERGED</b> | <b>Frequency</b> | <b>Percent</b> | <b>Cumulative<br/>Frequency</b> | <b>Cumulative<br/>Percent</b> |
|----------------|------------------|----------------|---------------------------------|-------------------------------|
| <b>Yes</b>     | 192              | 91.43          | 192                             | 91.43                         |
| <b>No</b>      | 18               | 8.57           | 210                             | 100.00                        |

### **Binomial Proportion**

**EMERGED = Yes**

|                             |        |
|-----------------------------|--------|
| <b>Proportion</b>           | 0.9143 |
| <b>ASE</b>                  | 0.0193 |
| <b>95% Lower Conf Limit</b> | 0.8764 |
| <b>95% Upper Conf Limit</b> | 0.9521 |

### **Exact Conf Limits**

|                             |        |
|-----------------------------|--------|
| <b>95% Lower Conf Limit</b> | 0.8679 |
| <b>95% Upper Conf Limit</b> | 0.9484 |

### **Test of H0: Proportion = 0.5**

|                              |         |
|------------------------------|---------|
| <b>ASE under H0</b>          | 0.0345  |
| <b>Z</b>                     | 12.0071 |
| <b>One-sided Pr &gt; Z</b>   | <.0001  |
| <b>Two-sided Pr &gt;  Z </b> | <.0001  |

**Sample Size = 210**



## Adults Emerged with SE by Group

The FREQ Procedure

GROUP=4=AgCNP

| <b>EMERGED</b> | <b>Frequency</b> | <b>Percent</b> | <b>Cumulative<br/>Frequency</b> | <b>Cumulative<br/>Percent</b> |
|----------------|------------------|----------------|---------------------------------|-------------------------------|
| <b>Yes</b>     | 37               | 17.62          | 37                              | 17.62                         |
| <b>No</b>      | 173              | 82.38          | 210                             | 100.00                        |

### **Binomial Proportion**

**EMERGED = Yes**

|                             |        |
|-----------------------------|--------|
| <b>Proportion</b>           | 0.1762 |
| <b>ASE</b>                  | 0.0263 |
| <b>95% Lower Conf Limit</b> | 0.1247 |
| <b>95% Upper Conf Limit</b> | 0.2277 |

### **Exact Conf Limits**

|                             |        |
|-----------------------------|--------|
| <b>95% Lower Conf Limit</b> | 0.1272 |
| <b>95% Upper Conf Limit</b> | 0.2346 |

### **Test of H0: Proportion = 0.5**

|                              |         |
|------------------------------|---------|
| <b>ASE under H0</b>          | 0.0345  |
| <b>Z</b>                     | -9.3849 |
| <b>One-sided Pr &lt; Z</b>   | <.0001  |
| <b>Two-sided Pr &gt;  Z </b> | <.0001  |

**Sample Size = 210**

Adults Emerged with SE by Group

The FREQ Procedure

GROUP=5=AgNO3

| <b>EMERGED</b> | <b>Frequency</b> | <b>Percent</b> | <b>Cumulative<br/>Frequency</b> | <b>Cumulative<br/>Percent</b> |
|----------------|------------------|----------------|---------------------------------|-------------------------------|
| No             | 210              | 100.00         | 210                             | 100.00                        |

**Binomial Proportion**

**EMERGED = No**

|                             |        |
|-----------------------------|--------|
| <b>Proportion</b>           | 1.0000 |
| <b>ASE</b>                  | 0.0000 |
| <b>95% Lower Conf Limit</b> | 1.0000 |
| <b>95% Upper Conf Limit</b> | 1.0000 |

**Exact Conf Limits**

|                             |        |
|-----------------------------|--------|
| <b>95% Lower Conf Limit</b> | 0.9826 |
| <b>95% Upper Conf Limit</b> | 1.0000 |

**Test of H0: Proportion = 0.5**

|                              |         |
|------------------------------|---------|
| <b>ASE under H0</b>          | 0.0345  |
| <b>Z</b>                     | 14.4914 |
| <b>One-sided Pr &gt; Z</b>   | <.0001  |
| <b>Two-sided Pr &gt;  Z </b> | <.0001  |

**Sample Size = 210**

---

### Tukey Style Multiple Comparisons of Proportions

| Compare | Diff  | SE   | q     | q(.001) | Conclude |
|---------|-------|------|-------|---------|----------|
| 3 vs 5  | 70.1  | 1.97 | 35.58 | 5.484   | R        |
| 3 vs 4  | 47.85 | 1.97 | 24.29 | 5.484   | R        |
| 3 vs 2  | 15.16 | 1.97 | 7.69  | 5.484   | R        |
| 3 vs 1  | 0     | 1.97 | 0     | 5.484   | A        |
| 1 vs 5  | 70.1  | 1.97 | 35.58 | 5.484   | R        |
| 1 vs 4  | 47.85 | 1.97 | 24.29 | 5.484   | R        |
| 1 vs 2  | 15.16 | 1.97 | 7.69  | 5.484   | R        |
| 2 vs 5  | 54.94 | 1.97 | 27.89 | 5.484   | R        |
| 2 vs 4  | 32.7  | 1.97 | 16.6  | 5.484   | R        |
| 4 vs 5  | 22.24 | 1.97 | 11.29 | 5.484   | R        |

Reference: Biostatistical Analysis, Fourth Edition, Jerrold Zar, 1999, p564.

---

### Figure 6b- % Larvae dead by Group;

Chi-Square Analysis for a 2x5 Figure

The FREQ Procedure

| Frequency<br>Col Pct | LARVAE_DEAD | Figure of LARVAE_DEAD by GROUP |                   |       |        |         | Total |
|----------------------|-------------|--------------------------------|-------------------|-------|--------|---------|-------|
|                      |             | 1=Control_with                 | 2=Control_without | 3=CN  | 4=AgCN | 5=AgNO3 |       |
| Yes                  |             | 12                             | 18                | 15    | 138    | 178     | 361   |
|                      |             | 5.71                           | 8.57              | 7.14  | 65.71  | 84.76   |       |
| No                   |             | 198                            | 192               | 195   | 72     | 32      | 689   |
|                      |             | 94.29                          | 91.43             | 92.86 | 34.29  | 15.24   |       |
| Total                |             | 210                            | 210               | 210   | 210    | 210     | 1050  |

**Statistics for Figure of LARVAE\_DEAD by GROUP**

| Statistic                   | DF | Value    | Prob   |
|-----------------------------|----|----------|--------|
| Chi-Square                  | 4  | 535.2138 | <.0001 |
| Likelihood Ratio Chi-Square | 4  | 579.2057 | <.0001 |
| Mantel-Haenszel Chi-Square  | 1  | 430.8201 | <.0001 |
| Phi Coefficient             |    | 0.7140   |        |
| Contingency Coefficient     |    | 0.5811   |        |
| Cramer's V                  |    | 0.7140   |        |

**Sample Size = 1050**

|                              |
|------------------------------|
| Larvae Dead with SE by Group |
|------------------------------|

The FREQ Procedure  
GROUP=1=Control\_with

| <b>LARVAE_DEAD</b> | <b>Frequency</b> | <b>Percent</b> | <b>Cumulative<br/>Frequency</b> | <b>Cumulative<br/>Percent</b> |
|--------------------|------------------|----------------|---------------------------------|-------------------------------|
| <b>Yes</b>         | 12               | 5.71           | 12                              | 5.71                          |
| <b>No</b>          | 198              | 94.29          | 210                             | 100.00                        |

### **Binomial Proportion**

**LARVAE\_DEAD = Yes**

|                             |        |
|-----------------------------|--------|
| <b>Proportion</b>           | 0.0571 |
| <b>ASE</b>                  | 0.0160 |
| <b>95% Lower Conf Limit</b> | 0.0257 |
| <b>95% Upper Conf Limit</b> | 0.0885 |

### **Exact Conf Limits**

|                             |        |
|-----------------------------|--------|
| <b>95% Lower Conf Limit</b> | 0.0299 |
| <b>95% Upper Conf Limit</b> | 0.0977 |

### **Test of H0: Proportion = 0.5**

|                              |          |
|------------------------------|----------|
| <b>ASE under H0</b>          | 0.0345   |
| <b>Z</b>                     | -12.8352 |
| <b>One-sided Pr &lt; Z</b>   | <.0001   |
| <b>Two-sided Pr &gt;  Z </b> | <.0001   |

**Sample Size = 210**

Larvae Dead with SE by Group

The FREQ Procedure  
GROUP=2=Control\_without

| LARVAE_DEAD | Frequency | Percent | Cumulative<br>Frequency | Cumulative<br>Percent |
|-------------|-----------|---------|-------------------------|-----------------------|
| Yes         | 18        | 8.57    | 18                      | 8.57                  |
| No          | 192       | 91.43   | 210                     | 100.00                |

**Binomial Proportion**

**LARVAE\_DEAD = Yes**

|                             |        |
|-----------------------------|--------|
| <b>Proportion</b>           | 0.0857 |
| <b>ASE</b>                  | 0.0193 |
| <b>95% Lower Conf Limit</b> | 0.0479 |
| <b>95% Upper Conf Limit</b> | 0.1236 |

**Exact Conf Limits**

|                             |        |
|-----------------------------|--------|
| <b>95% Lower Conf Limit</b> | 0.0516 |
| <b>95% Upper Conf Limit</b> | 0.1321 |

**Test of H0: Proportion = 0.5**

|                              |          |
|------------------------------|----------|
| <b>ASE under H0</b>          | 0.0345   |
| <b>Z</b>                     | -12.0071 |
| <b>One-sided Pr &lt; Z</b>   | <.0001   |
| <b>Two-sided Pr &gt;  Z </b> | <.0001   |

**Sample Size = 210**

Larvae Dead with SE by Group

The FREQ Procedure

GROUP=3=CNP

| <b>LARVAE_DEAD</b> | <b>Frequency</b> | <b>Percent</b> | <b>Cumulative<br/>Frequency</b> | <b>Cumulative<br/>Percent</b> |
|--------------------|------------------|----------------|---------------------------------|-------------------------------|
| <b>Yes</b>         | 15               | 7.14           | 15                              | 7.14                          |
| <b>No</b>          | 195              | 92.86          | 210                             | 100.00                        |

**Binomial Proportion**

**LARVAE\_DEAD = Yes**

|                             |        |
|-----------------------------|--------|
| <b>Proportion</b>           | 0.0714 |
| <b>ASE</b>                  | 0.0178 |
| <b>95% Lower Conf Limit</b> | 0.0366 |
| <b>95% Upper Conf Limit</b> | 0.1063 |

**Exact Conf Limits**

|                             |        |
|-----------------------------|--------|
| <b>95% Lower Conf Limit</b> | 0.0405 |
| <b>95% Upper Conf Limit</b> | 0.1151 |

**Test of H0: Proportion = 0.5**

|                              |          |
|------------------------------|----------|
| <b>ASE under H0</b>          | 0.0345   |
| <b>Z</b>                     | -12.4212 |
| <b>One-sided Pr &lt; Z</b>   | <.0001   |
| <b>Two-sided Pr &gt;  Z </b> | <.0001   |

**Sample Size = 210**

Larvae Dead with SE by Group

The FREQ Procedure  
GROUP=4=AgCNP

| LARVAE_DEAD | Frequency | Percent | Cumulative<br>Frequency | Cumulative<br>Percent |
|-------------|-----------|---------|-------------------------|-----------------------|
| Yes         | 138       | 65.71   | 138                     | 65.71                 |
| No          | 72        | 34.29   | 210                     | 100.00                |

**Binomial Proportion**

**LARVAE\_DEAD = Yes**

|                             |        |
|-----------------------------|--------|
| <b>Proportion</b>           | 0.6571 |
| <b>ASE</b>                  | 0.0328 |
| <b>95% Lower Conf Limit</b> | 0.5929 |
| <b>95% Upper Conf Limit</b> | 0.7213 |

**Exact Conf Limits**

|                             |        |
|-----------------------------|--------|
| <b>95% Lower Conf Limit</b> | 0.5887 |
| <b>95% Upper Conf Limit</b> | 0.7211 |

**Test of H0: Proportion = 0.5**

|                              |        |
|------------------------------|--------|
| <b>ASE under H0</b>          | 0.0345 |
| <b>Z</b>                     | 4.5544 |
| <b>One-sided Pr &gt; Z</b>   | <.0001 |
| <b>Two-sided Pr &gt;  Z </b> | <.0001 |

**Sample Size = 210**



Larvae Dead with SE by Group

The FREQ Procedure

GROUP=5=AgNO3

| <b>LARVAE_DEAD</b> | <b>Frequency</b> | <b>Percent</b> | <b>Cumulative<br/>Frequency</b> | <b>Cumulative<br/>Percent</b> |
|--------------------|------------------|----------------|---------------------------------|-------------------------------|
| <b>Yes</b>         | 178              | 84.76          | 178                             | 84.76                         |
| <b>No</b>          | 32               | 15.24          | 210                             | 100.00                        |

**Binomial Proportion**

**LARVAE\_DEAD = Yes**

|                             |        |
|-----------------------------|--------|
| <b>Proportion</b>           | 0.8476 |
| <b>ASE</b>                  | 0.0248 |
| <b>95% Lower Conf Limit</b> | 0.7990 |
| <b>95% Upper Conf Limit</b> | 0.8962 |

**Exact Conf Limits**

|                             |        |
|-----------------------------|--------|
| <b>95% Lower Conf Limit</b> | 0.7917 |
| <b>95% Upper Conf Limit</b> | 0.8934 |

**Test of H0: Proportion = 0.5**

|                              |         |
|------------------------------|---------|
| <b>ASE under H0</b>          | 0.0345  |
| <b>Z</b>                     | 10.0750 |
| <b>One-sided Pr &gt; Z</b>   | <.0001  |
| <b>Two-sided Pr &gt;  Z </b> | <.0001  |

**Sample Size = 210**

Tukey Style Multiple Comparisons of Proportions

| Compare | Diff  | SE   | q     | q(.001) | Conclude |
|---------|-------|------|-------|---------|----------|
| 5 vs 1  | 52.82 | 1.97 | 26.81 | 5.484   | R        |
| 5 vs 3  | 51.18 | 1.97 | 25.98 | 5.484   | R        |
| 5 vs 2  | 49.68 | 1.97 | 25.22 | 5.484   | R        |
| 5 vs 4  | 12.78 | 1.97 | 6.49  | 5.484   | R        |
| 4 vs 1  | 40.04 | 1.97 | 20.32 | 5.484   | R        |
| 4 vs 3  | 38.4  | 1.97 | 19.49 | 5.484   | R        |
| 4 vs 2  | 36.9  | 1.97 | 18.73 | 5.484   | R        |
| 2 vs 1  | 3.14  | 1.97 | 1.59  | 5.484   | A        |
| 2 vs 3  | 1.5   | 1.97 | 0.76  | 5.484   | A        |
| 3 vs 1  | 1.64  | 1.97 | 0.83  | 5.484   | A        |

Reference: Biostatistical Analysis, Fourth Edition, Jerrold Zar, 1999, p564.

**Figure 6c- % Adults Emerged by Group;**

Chi-Square Analysis for a 2x5 Figure

| Frequency<br>Col Pct | EMERGED | Figure of EMERGED by GROUP |                   |       |         |         | Total |
|----------------------|---------|----------------------------|-------------------|-------|---------|---------|-------|
|                      |         | GROUP                      |                   |       |         |         |       |
|                      |         | 1=Control_with             | 2=Control_without | 3=CNP | 4=AgCNP | 5=AgNO3 |       |
| Yes                  |         | 161                        | 150               | 141   | 34      | 0       | 486   |
|                      |         | 89.44                      | 83.33             | 78.33 | 18.89   | 0.00    |       |
| No                   |         | 19                         | 30                | 39    | 146     | 180     | 414   |
|                      |         | 10.56                      | 16.67             | 21.67 | 81.11   | 100.00  |       |
| Total                |         | 180                        | 180               | 180   | 180     | 180     | 900   |

**Statistics for Figure of EMERGED by GROUP**

| Statistic                   | DF | Value    | Prob   |
|-----------------------------|----|----------|--------|
| Chi-Square                  | 4  | 496.9315 | <.0001 |
| Likelihood Ratio Chi-Square | 4  | 595.7180 | <.0001 |
| Mantel-Haenszel Chi-Square  | 1  | 428.5893 | <.0001 |
| Phi Coefficient             |    | 0.7431   |        |
| Contingency Coefficient     |    | 0.5964   |        |
| Cramer's V                  |    | 0.7431   |        |

**Sample Size = 900**

|                                     |
|-------------------------------------|
| Proportion Emerged with SE by Group |
|-------------------------------------|

The FREQ Procedure  
GROUP=1=Control\_with

| <b>EMERGED</b> | <b>Frequency</b> | <b>Percent</b> | <b>Cumulative<br/>Frequency</b> | <b>Cumulative<br/>Percent</b> |
|----------------|------------------|----------------|---------------------------------|-------------------------------|
| <b>Yes</b>     | 161              | 89.44          | 161                             | 89.44                         |
| <b>No</b>      | 19               | 10.56          | 180                             | 100.00                        |

### **Binomial Proportion**

**EMERGED = Yes**

|                             |        |
|-----------------------------|--------|
| <b>Proportion</b>           | 0.8944 |
| <b>ASE</b>                  | 0.0229 |
| <b>95% Lower Conf Limit</b> | 0.8496 |
| <b>95% Upper Conf Limit</b> | 0.9393 |

### **Exact Conf Limits**

|                             |        |
|-----------------------------|--------|
| <b>95% Lower Conf Limit</b> | 0.8401 |
| <b>95% Upper Conf Limit</b> | 0.9352 |

### **Test of H0: Proportion = 0.5**

|                              |         |
|------------------------------|---------|
| <b>ASE under H0</b>          | 0.0373  |
| <b>Z</b>                     | 10.5841 |
| <b>One-sided Pr &gt; Z</b>   | <.0001  |
| <b>Two-sided Pr &gt;  Z </b> | <.0001  |

**Sample Size = 180**

Proportion Emerged with SE by Group

The FREQ Procedure  
GROUP=2=Control\_without

| <b>EMERGED</b> | <b>Frequency</b> | <b>Percent</b> | <b>Cumulative<br/>Frequency</b> | <b>Cumulative<br/>Percent</b> |
|----------------|------------------|----------------|---------------------------------|-------------------------------|
| <b>Yes</b>     | 150              | 83.33          | 150                             | 83.33                         |
| <b>No</b>      | 30               | 16.67          | 180                             | 100.00                        |

**Binomial Proportion**

**EMERGED = Yes**

|                             |        |
|-----------------------------|--------|
| <b>Proportion</b>           | 0.8333 |
| <b>ASE</b>                  | 0.0278 |
| <b>95% Lower Conf Limit</b> | 0.7789 |
| <b>95% Upper Conf Limit</b> | 0.8878 |

**Exact Conf Limits**

|                             |        |
|-----------------------------|--------|
| <b>95% Lower Conf Limit</b> | 0.7707 |
| <b>95% Upper Conf Limit</b> | 0.8846 |

**Test of H0: Proportion = 0.5**

|                              |        |
|------------------------------|--------|
| <b>ASE under H0</b>          | 0.0373 |
| <b>Z</b>                     | 8.9443 |
| <b>One-sided Pr &gt; Z</b>   | <.0001 |
| <b>Two-sided Pr &gt;  Z </b> | <.0001 |

**Sample Size = 180**

Proportion Emerged with SE by Group

The FREQ Procedure  
GROUP=3=CNP

| <b>EMERGED</b> | <b>Frequency</b> | <b>Percent</b> | <b>Cumulative<br/>Frequency</b> | <b>Cumulative<br/>Percent</b> |
|----------------|------------------|----------------|---------------------------------|-------------------------------|
| <b>Yes</b>     | 141              | 78.33          | 141                             | 78.33                         |
| <b>No</b>      | 39               | 21.67          | 180                             | 100.00                        |

**Binomial Proportion**

**EMERGED = Yes**

|                             |        |
|-----------------------------|--------|
| <b>Proportion</b>           | 0.7833 |
| <b>ASE</b>                  | 0.0307 |
| <b>95% Lower Conf Limit</b> | 0.7231 |
| <b>95% Upper Conf Limit</b> | 0.8435 |

**Exact Conf Limits**

|                             |        |
|-----------------------------|--------|
| <b>95% Lower Conf Limit</b> | 0.7159 |
| <b>95% Upper Conf Limit</b> | 0.8412 |

**Test of H0: Proportion = 0.5**

|                              |        |
|------------------------------|--------|
| <b>ASE under H0</b>          | 0.0373 |
| <b>Z</b>                     | 7.6026 |
| <b>One-sided Pr &gt; Z</b>   | <.0001 |
| <b>Two-sided Pr &gt;  Z </b> | <.0001 |

**Sample Size = 180**

Proportion Emerged with SE by Group

The FREQ Procedure  
GROUP=4=AgCNP

| <b>EMERGED</b> | <b>Frequency</b> | <b>Percent</b> | <b>Cumulative<br/>Frequency</b> | <b>Cumulative<br/>Percent</b> |
|----------------|------------------|----------------|---------------------------------|-------------------------------|
| <b>Yes</b>     | 34               | 18.89          | 34                              | 18.89                         |
| <b>No</b>      | 146              | 81.11          | 180                             | 100.00                        |

**Binomial Proportion**

**EMERGED = Yes**

|                             |        |
|-----------------------------|--------|
| <b>Proportion</b>           | 0.1889 |
| <b>ASE</b>                  | 0.0292 |
| <b>95% Lower Conf Limit</b> | 0.1317 |
| <b>95% Upper Conf Limit</b> | 0.2461 |

**Exact Conf Limits**

|                             |        |
|-----------------------------|--------|
| <b>95% Lower Conf Limit</b> | 0.1345 |
| <b>95% Upper Conf Limit</b> | 0.2538 |

**Test of H0: Proportion = 0.5**

|                              |         |
|------------------------------|---------|
| <b>ASE under H0</b>          | 0.0373  |
| <b>Z</b>                     | -8.3480 |
| <b>One-sided Pr &lt; Z</b>   | <.0001  |
| <b>Two-sided Pr &gt;  Z </b> | <.0001  |

**Sample Size = 180**

Proportion Emerged with SE by Group

The FREQ Procedure  
GROUP=5=AgNO3

| <b>EMERGED</b> | <b>Frequency</b> | <b>Percent</b> | <b>Cumulative<br/>Frequency</b> | <b>Cumulative<br/>Percent</b> |
|----------------|------------------|----------------|---------------------------------|-------------------------------|
| No             | 180              | 100.00         | 180                             | 100.00                        |

**Binomial Proportion**

**EMERGED = No**

|                             |        |
|-----------------------------|--------|
| <b>Proportion</b>           | 1.0000 |
| <b>ASE</b>                  | 0.0000 |
| <b>95% Lower Conf Limit</b> | 1.0000 |
| <b>95% Upper Conf Limit</b> | 1.0000 |

**Exact Conf Limits**

|                             |        |
|-----------------------------|--------|
| <b>95% Lower Conf Limit</b> | 0.9797 |
| <b>95% Upper Conf Limit</b> | 1.0000 |

**Test of H0: Proportion = 0.5**

|                              |         |
|------------------------------|---------|
| <b>ASE under H0</b>          | 0.0373  |
| <b>Z</b>                     | 13.4164 |
| <b>One-sided Pr &gt; Z</b>   | <.0001  |
| <b>Two-sided Pr &gt;  Z </b> | <.0001  |

**Sample Size = 180**



Tukey Style Multiple Comparisons of Proportions

| Compare | Diff  | SE   | q     | q(.05) | Conclude |
|---------|-------|------|-------|--------|----------|
| 1 vs 5  | 67.94 | 2.13 | 31.9  | 3.585  | R        |
| 1 vs 4  | 44.96 | 2.13 | 21.11 | 3.585  | R        |
| 1 vs 3  | 8.69  | 2.13 | 4.08  | 3.585  | R        |
| 1 vs 2  | 5.08  | 2.13 | 2.38  | 3.585  | A        |
| 2 vs 5  | 62.87 | 2.13 | 29.52 | 3.585  | R        |
| 2 vs 4  | 39.89 | 2.13 | 18.73 | 3.585  | R        |
| 2 vs 3  | 3.61  | 2.13 | 1.7   | 3.585  | A        |
| 3 vs 5  | 59.25 | 2.13 | 27.82 | 3.585  | R        |
| 3 vs 4  | 36.27 | 2.13 | 17.03 | 3.585  | R        |
| 4 vs 5  | 22.98 | 2.13 | 10.79 | 3.585  | R        |

Tukey Style Multiple Comparisons of Proportions

| Compare | Diff  | SE   | q     | q(.01) | Conclude |
|---------|-------|------|-------|--------|----------|
| 1 vs 5  | 67.94 | 2.13 | 31.9  | 4.603  | R        |
| 1 vs 4  | 44.96 | 2.13 | 21.11 | 4.603  | R        |
| 1 vs 3  | 8.69  | 2.13 | 4.08  | 4.603  | A        |
| 1 vs 2  | 5.08  | 2.13 | 2.38  | 4.603  | A        |
| 2 vs 5  | 62.87 | 2.13 | 29.52 | 4.603  | R        |
| 2 vs 4  | 39.89 | 2.13 | 18.73 | 4.603  | R        |
| 2 vs 3  | 3.61  | 2.13 | 1.7   | 4.603  | A        |
| 3 vs 5  | 59.25 | 2.13 | 27.82 | 4.603  | R        |
| 3 vs 4  | 36.27 | 2.13 | 17.03 | 4.603  | R        |
| 4 vs 5  | 22.98 | 2.13 | 10.79 | 4.603  | R        |

Reference: Biostatistical Analysis, Fourth Edition, Jerrold Zar, 1999, p564.

Tukey Style Multiple Comparisons of Proportions

| Compare | Diff  | SE   | q     | q(.001) | Conclude |
|---------|-------|------|-------|---------|----------|
| 1 vs 5  | 67.94 | 2.13 | 31.9  | 5.484   | R        |
| 1 vs 4  | 44.96 | 2.13 | 21.11 | 5.484   | R        |
| 1 vs 3  | 8.69  | 2.13 | 4.08  | 5.484   | A        |
| 1 vs 2  | 5.08  | 2.13 | 2.38  | 5.484   | A        |
| 2 vs 5  | 62.87 | 2.13 | 29.52 | 5.484   | R        |
| 2 vs 4  | 39.89 | 2.13 | 18.73 | 5.484   | R        |
| 2 vs 3  | 3.61  | 2.13 | 1.7   | 5.484   | A        |
| 3 vs 5  | 59.25 | 2.13 | 27.82 | 5.484   | R        |
| 3 vs 4  | 36.27 | 2.13 | 17.03 | 5.484   | R        |
| 4 vs 5  | 22.98 | 2.13 | 10.79 | 5.484   | R        |

Reference: Biostatistical Analysis, Fourth Edition, Jerrold Zar, 1999, p564.

**Figure 6c- % Larvae dead by Group;**

|                                      |
|--------------------------------------|
| Chi-Square Analysis for a 2x5 Figure |
|--------------------------------------|

The FREQ Procedure

| Frequency | LARVAE_DEAD | Figure of LARVAE_DEAD by GROUP |                   |           |             |             | Total |
|-----------|-------------|--------------------------------|-------------------|-----------|-------------|-------------|-------|
|           |             | 1=Control_wit<br>h             | 2=Control_without | 3=CN<br>P | 4=AgCN<br>P | 5=AgNO<br>3 |       |
| Col Pct   | D           |                                |                   |           |             |             | 1     |
|           | Yes         | 11                             | 23                | 31        | 104         | 113         | 282   |

|              |       |       |       |       |       |     |
|--------------|-------|-------|-------|-------|-------|-----|
|              | 6.11  | 12.78 | 17.22 | 57.78 | 62.78 |     |
| <b>No</b>    | 169   | 157   | 149   | 76    | 67    | 618 |
|              | 93.89 | 87.22 | 82.78 | 42.22 | 37.22 |     |
| <b>Total</b> | 180   | 180   | 180   | 180   | 180   | 900 |

**Statistics for Figure of LARVAE\_DEAD by GROUP**

| <b>Statistic</b>                   | <b>DF</b> | <b>Value</b> | <b>Prob</b> |
|------------------------------------|-----------|--------------|-------------|
| <b>Chi-Square</b>                  | 4         | 239.9091     | <.0001      |
| <b>Likelihood Ratio Chi-Square</b> | 4         | 250.5727     | <.0001      |
| <b>Mantel-Haenszel Chi-Square</b>  | 1         | 209.4989     | <.0001      |
| <b>Phi Coefficient</b>             |           | 0.5163       |             |
| <b>Contingency Coefficient</b>     |           | 0.4588       |             |
| <b>Cramer's V</b>                  |           | 0.5163       |             |

**Sample Size = 900**

|                              |
|------------------------------|
| Larvae Dead with SE by Group |
|------------------------------|

The FREQ Procedure  
GROUP=1=Control\_with

| <b>LARVAE_DEAD</b> | <b>Frequency</b> | <b>Percent</b> | <b>Cumulative Frequency</b> | <b>Cumulative Percent</b> |
|--------------------|------------------|----------------|-----------------------------|---------------------------|
| <b>Yes</b>         | 11               | 6.11           | 11                          | 6.11                      |
| <b>No</b>          | 169              | 93.89          | 180                         | 100.00                    |

## Binomial Proportion

**LARVAE\_DEAD = Yes**

|                             |        |
|-----------------------------|--------|
| <b>Proportion</b>           | 0.0611 |
| <b>ASE</b>                  | 0.0179 |
| <b>95% Lower Conf Limit</b> | 0.0261 |
| <b>95% Upper Conf Limit</b> | 0.0961 |

### Exact Conf Limits

|                             |        |
|-----------------------------|--------|
| <b>95% Lower Conf Limit</b> | 0.0309 |
| <b>95% Upper Conf Limit</b> | 0.1067 |

### Test of H0: Proportion = 0.5

|                              |          |
|------------------------------|----------|
| <b>ASE under H0</b>          | 0.0373   |
| <b>Z</b>                     | -11.7766 |
| <b>One-sided Pr &lt; Z</b>   | <.0001   |
| <b>Two-sided Pr &gt;  Z </b> | <.0001   |

**Sample Size = 180**

Larvae Dead with SE by Group

The FREQ Procedure  
GROUP=2=Control\_without

| <b>LARVAE_DEAD</b> | <b>Frequency</b> | <b>Percent</b> | <b>Cumulative<br/>Frequency</b> | <b>Cumulative<br/>Percent</b> |
|--------------------|------------------|----------------|---------------------------------|-------------------------------|
| <b>Yes</b>         | 23               | 12.78          | 23                              | 12.78                         |
| <b>No</b>          | 157              | 87.22          | 180                             | 100.00                        |

**Binomial Proportion**

**LARVAE\_DEAD = Yes**

|                             |        |
|-----------------------------|--------|
| <b>Proportion</b>           | 0.1278 |
| <b>ASE</b>                  | 0.0249 |
| <b>95% Lower Conf Limit</b> | 0.0790 |
| <b>95% Upper Conf Limit</b> | 0.1765 |

**Exact Conf Limits**

|                             |        |
|-----------------------------|--------|
| <b>95% Lower Conf Limit</b> | 0.0828 |
| <b>95% Upper Conf Limit</b> | 0.1855 |

**Test of H0: Proportion = 0.5**

|                              |         |
|------------------------------|---------|
| <b>ASE under H0</b>          | 0.0373  |
| <b>Z</b>                     | -9.9878 |
| <b>One-sided Pr &lt; Z</b>   | <.0001  |
| <b>Two-sided Pr &gt;  Z </b> | <.0001  |

**Sample Size = 180**

Larvae Dead with SE by Group

The FREQ Procedure

GROUP=3=CNP

| <b>LARVAE_DEAD</b> | <b>Frequency</b> | <b>Percent</b> | <b>Cumulative<br/>Frequency</b> | <b>Cumulative<br/>Percent</b> |
|--------------------|------------------|----------------|---------------------------------|-------------------------------|
| <b>Yes</b>         | 31               | 17.22          | 31                              | 17.22                         |
| <b>No</b>          | 149              | 82.78          | 180                             | 100.00                        |

**Binomial Proportion**

**LARVAE\_DEAD = Yes**

|                             |        |
|-----------------------------|--------|
| <b>Proportion</b>           | 0.1722 |
| <b>ASE</b>                  | 0.0281 |
| <b>95% Lower Conf Limit</b> | 0.1171 |
| <b>95% Upper Conf Limit</b> | 0.2274 |

**Exact Conf Limits**

|                             |        |
|-----------------------------|--------|
| <b>95% Lower Conf Limit</b> | 0.1201 |
| <b>95% Upper Conf Limit</b> | 0.2355 |

**Test of H0: Proportion = 0.5**

|                              |         |
|------------------------------|---------|
| <b>ASE under H0</b>          | 0.0373  |
| <b>Z</b>                     | -8.7952 |
| <b>One-sided Pr &lt; Z</b>   | <.0001  |
| <b>Two-sided Pr &gt;  Z </b> | <.0001  |

**Sample Size = 180**

Larvae Dead with SE by Group

The FREQ Procedure  
GROUP=4=AgCNP

| <b>LARVAE_DEAD</b> | <b>Frequency</b> | <b>Percent</b> | <b>Cumulative<br/>Frequency</b> | <b>Cumulative<br/>Percent</b> |
|--------------------|------------------|----------------|---------------------------------|-------------------------------|
| <b>Yes</b>         | 104              | 57.78          | 104                             | 57.78                         |
| <b>No</b>          | 76               | 42.22          | 180                             | 100.00                        |

**Binomial Proportion**

**LARVAE\_DEAD = Yes**

|                             |        |
|-----------------------------|--------|
| <b>Proportion</b>           | 0.5778 |
| <b>ASE</b>                  | 0.0368 |
| <b>95% Lower Conf Limit</b> | 0.5056 |
| <b>95% Upper Conf Limit</b> | 0.6499 |

**Exact Conf Limits**

|                             |        |
|-----------------------------|--------|
| <b>95% Lower Conf Limit</b> | 0.5021 |
| <b>95% Upper Conf Limit</b> | 0.6509 |

**Test of H0: Proportion = 0.5**

|                              |        |
|------------------------------|--------|
| <b>ASE under H0</b>          | 0.0373 |
| <b>Z</b>                     | 2.0870 |
| <b>One-sided Pr &gt; Z</b>   | 0.0184 |
| <b>Two-sided Pr &gt;  Z </b> | 0.0369 |

**Sample Size = 180**

Larvae Dead with SE by Group

The FREQ Procedure

GROUP=5=AgNO3

| <b>LARVAE_DEAD</b> | <b>Frequency</b> | <b>Percent</b> | <b>Cumulative<br/>Frequency</b> | <b>Cumulative<br/>Percent</b> |
|--------------------|------------------|----------------|---------------------------------|-------------------------------|
| <b>Yes</b>         | 113              | 62.78          | 113                             | 62.78                         |
| <b>No</b>          | 67               | 37.22          | 180                             | 100.00                        |

**Binomial Proportion**

**LARVAE\_DEAD = Yes**

|                             |        |
|-----------------------------|--------|
| <b>Proportion</b>           | 0.6278 |
| <b>ASE</b>                  | 0.0360 |
| <b>95% Lower Conf Limit</b> | 0.5572 |
| <b>95% Upper Conf Limit</b> | 0.6984 |

**Exact Conf Limits**

|                             |        |
|-----------------------------|--------|
| <b>95% Lower Conf Limit</b> | 0.5527 |
| <b>95% Upper Conf Limit</b> | 0.6985 |

**Test of H0: Proportion = 0.5**

|                              |        |
|------------------------------|--------|
| <b>ASE under H0</b>          | 0.0373 |
| <b>Z</b>                     | 3.4286 |
| <b>One-sided Pr &gt; Z</b>   | 0.0003 |
| <b>Two-sided Pr &gt;  Z </b> | 0.0006 |

**Sample Size = 180**



---

Tukey Style Multiple Comparisons of Proportions

| Compare | Diff  | SE   | q     | q(.05) | Conclude |
|---------|-------|------|-------|--------|----------|
| 5 vs 1  | 37.77 | 2.13 | 17.73 | 3.585  | R        |
| 5 vs 2  | 31.25 | 2.13 | 14.67 | 3.585  | R        |
| 5 vs 3  | 27.71 | 2.13 | 13.01 | 3.585  | R        |
| 5 vs 4  | 2.91  | 2.13 | 1.37  | 3.585  | A        |
| 4 vs 1  | 34.86 | 2.13 | 16.37 | 3.585  | R        |
| 4 vs 2  | 28.34 | 2.13 | 13.3  | 3.585  | R        |
| 4 vs 3  | 24.8  | 2.13 | 11.64 | 3.585  | R        |
| 3 vs 1  | 10.06 | 2.13 | 4.72  | 3.585  | R        |
| 3 vs 2  | 3.54  | 2.13 | 1.66  | 3.585  | A        |
| 2 vs 1  | 6.52  | 2.13 | 3.06  | 3.585  | A        |

Reference: Biostatistical Analysis, Fourth Edition, Jerrold Zar, 1999, p564.

---

Tukey Style Multiple Comparisons of Proportions

| Compare | Diff  | SE   | q     | q(.01) | Conclude |
|---------|-------|------|-------|--------|----------|
| 5 vs 1  | 37.77 | 2.13 | 17.73 | 4.603  | R        |
| 5 vs 2  | 31.25 | 2.13 | 14.67 | 4.603  | R        |
| 5 vs 3  | 27.71 | 2.13 | 13.01 | 4.603  | R        |
| 5 vs 4  | 2.91  | 2.13 | 1.37  | 4.603  | A        |
| 4 vs 1  | 34.86 | 2.13 | 16.37 | 4.603  | R        |
| 4 vs 2  | 28.34 | 2.13 | 13.3  | 4.603  | R        |
| 4 vs 3  | 24.8  | 2.13 | 11.64 | 4.603  | R        |
| 3 vs 1  | 10.06 | 2.13 | 4.72  | 4.603  | R        |
| 3 vs 2  | 3.54  | 2.13 | 1.66  | 4.603  | A        |
| 2 vs 1  | 6.52  | 2.13 | 3.06  | 4.603  | A        |

Reference: Biostatistical Analysis, Fourth Edition, Jerrold Zar, 1999, p564.

---

Tukey Style Multiple Comparisons of Proportions

| Compare | Diff  | SE   | q     | q(.001) | Conclude |
|---------|-------|------|-------|---------|----------|
| 5 vs 1  | 37.77 | 2.13 | 17.73 | 5.484   | R        |
| 5 vs 2  | 31.25 | 2.13 | 14.67 | 5.484   | R        |
| 5 vs 3  | 27.71 | 2.13 | 13.01 | 5.484   | R        |
| 5 vs 4  | 2.91  | 2.13 | 1.37  | 5.484   | A        |
| 4 vs 1  | 34.86 | 2.13 | 16.37 | 5.484   | R        |
| 4 vs 2  | 28.34 | 2.13 | 13.3  | 5.484   | R        |

|        |       |      |       |       |   |
|--------|-------|------|-------|-------|---|
| 4 vs 3 | 24.8  | 2.13 | 11.64 | 5.484 | R |
| 3 vs 1 | 10.06 | 2.13 | 4.72  | 5.484 | A |
| 3 vs 2 | 3.54  | 2.13 | 1.66  | 5.484 | A |
| 2 vs 1 | 6.52  | 2.13 | 3.06  | 5.484 | A |

Reference: Biostatistical Analysis, Fourth Edition, Jerrold Zar, 1999, p564.

---
