# Supplementary material for: Exposure to nanoceria impacts larval survival, life history traits and fecundity of Aedes aegypti
Source: PubMed Central journal article supplement (PMC7540862; doi:10.1371/journal.pntd.0008654), 2020-09-25
Supplement: pntd.0008654.s007.pdf [file pntd.0008654.s007.pdf]

## Figure 7a-Number of Females by Group;

The SAS System

The NPAR1WAY Procedure

### Wilcoxon Scores (Rank Sums) for Variable FEMALES Classified by Variable GROUP

| GROUP     | N | Sum of<br>Scores | Expected<br>Under H0 | Std Dev<br>Under H0 | Mean<br>Score |
|-----------|---|------------------|----------------------|---------------------|---------------|
| 1=Control | 6 | 67.50            | 57.0                 | 10.583005           | 11.250000     |
| 2=CNP     | 6 | 53.50            | 57.0                 | 10.583005           | 8.916667      |
| 3=AgCNP   | 6 | 50.00            | 57.0                 | 10.583005           | 8.333333      |

Average scores were used for ties.

### Kruskal-Wallis Test

Chi-Square DF Pr > ChiSq

1.0208 2 0.6002

GROUP=1=Control

**Analysis Variable : FEMALES**

| <b>N</b> | <b>Minimum</b> | <b>Maximum</b> | <b>Mean</b> | <b>Median</b> | <b>Std Dev</b> | <b>Std Error</b> | <b>Lower 95%<br/>CL for Mean</b> | <b>Upper 95%<br/>CL for Mean</b> |
|----------|----------------|----------------|-------------|---------------|----------------|------------------|----------------------------------|----------------------------------|
| 6        | 5.0000000      | 13.0000000     | 9.6666667   | 10.0000000    | 2.6583203      | 1.0852547        | 6.8769306                        | 12.4564027                       |

GROUP=2=CNP

**Analysis Variable : FEMALES**

| <b>N</b> | <b>Minimum</b> | <b>Maximum</b> | <b>Mean</b> | <b>Median</b> | <b>Std Dev</b> | <b>Std Error</b> | <b>Lower 95%<br/>CL for Mean</b> | <b>Upper 95%<br/>CL for Mean</b> |
|----------|----------------|----------------|-------------|---------------|----------------|------------------|----------------------------------|----------------------------------|
| 6        | 5.0000000      | 13.0000000     | 8.5000000   | 8.0000000     | 2.8106939      | 1.1474610        | 5.5503577                        | 11.4496423                       |

GROUP=3=AgCNP

**Analysis Variable : FEMALES**

| <b>N</b> | <b>Minimum</b> | <b>Maximum</b> | <b>Mean</b> | <b>Median</b> | <b>Std Dev</b> | <b>Std Error</b> | <b>Lower 95%<br/>CL for Mean</b> | <b>Upper 95%<br/>CL for Mean</b> |
|----------|----------------|----------------|-------------|---------------|----------------|------------------|----------------------------------|----------------------------------|
| 6        | 1.0000000      | 13.0000000     | 7.5000000   | 8.0000000     | 4.8062459      | 1.9621417        | 2.4561542                        | 12.5438458                       |

## Figure 7a-Egg weight by Group;

The SAS System

The NPAR1WAY Procedure

### Wilcoxon Scores (Rank Sums) for Variable EGGS Classified by Variable GROUP

| GROUP     | N | Sum of<br>Scores | Expected<br>Under H0 | Std Dev<br>Under H0 | Mean<br>Score |
|-----------|---|------------------|----------------------|---------------------|---------------|
| 1=Control | 6 | 52.50            | 57.0                 | 10.643971           | 8.750         |
| 2=CNP     | 6 | 76.50            | 57.0                 | 10.643971           | 12.750        |
| 3=AgCNP   | 6 | 42.00            | 57.0                 | 10.643971           | 7.000         |

Average scores were used for ties.

### Kruskal-Wallis Test

Chi-Square DF Pr > ChiSq

3.6807 2 0.1588

GROUP=1=Control

**Analysis Variable : EGGS**

| <b>N</b> | <b>Minimum</b> | <b>Maximum</b> | <b>Mean</b> | <b>Median</b> | <b>Std Dev</b> | <b>Std Error</b> | <b>Lower 95%<br/>CL for Mean</b> | <b>Upper 95%<br/>CL for Mean</b> |
|----------|----------------|----------------|-------------|---------------|----------------|------------------|----------------------------------|----------------------------------|
| 6        | 0              | 4.2000000      | 1.4166667   | 0.8500000     | 1.6690317      | 0.6813793        | -0.3348746                       | 3.1682080                        |

GROUP=2=CNP

**Analysis Variable : EGGS**

| <b>N</b> | <b>Minimum</b> | <b>Maximum</b> | <b>Mean</b> | <b>Median</b> | <b>Std Dev</b> | <b>Std Error</b> | <b>Lower 95%<br/>CL for Mean</b> | <b>Upper 95%<br/>CL for Mean</b> |
|----------|----------------|----------------|-------------|---------------|----------------|------------------|----------------------------------|----------------------------------|
| 6        | 1.6000000      | 2.6000000      | 1.9666667   | 1.9500000     | 0.3502380      | 0.1429841        | 1.5991144                        | 2.3342189                        |

GROUP=3=AgCNP

**Analysis Variable : EGGS**

| <b>N</b> | <b>Minimum</b> | <b>Maximum</b> | <b>Mean</b> | <b>Median</b> | <b>Std Dev</b> | <b>Std Error</b> | <b>Lower 95%<br/>CL for Mean</b> | <b>Upper 95%<br/>CL for Mean</b> |
|----------|----------------|----------------|-------------|---------------|----------------|------------------|----------------------------------|----------------------------------|
| 6        | 0              | 2.1000000      | 0.8666667   | 0.6500000     | 0.7916228      | 0.3231787        | 0.0359095                        | 1.6974239                        |

## Figure 7b-Number of Females by Group;

Used the normality test for small samples based on calculating the z-score from Skewness as described in: 2012\_Normality Tests for Statistical Analysis: A Guide for Non-Statisticians. All sample means failed to reject the null hypothesis that the data come from a normal distribution. Thus, we used ANOVA to evaluate mean differences.

The GLM Procedure

Dependent Variable: FEMALES

| Source                 | DF | Sum of Squares | Mean Square | F Value | Pr > F |
|------------------------|----|----------------|-------------|---------|--------|
| <b>Model</b>           | 3  | 380.9789683    | 126.9929894 | 39.46   | <.0001 |
| <b>Error</b>           | 31 | 99.7638889     | 3.2181900   |         |        |
| <b>Corrected Total</b> | 34 | 480.7428571    |             |         |        |

The SAS System

The MEANS Procedure  
GROUP=1=Control\_with

### Analysis Variable : FEMALES

| N | Minimum   | Maximum    | Mean      | Median     | Std Dev   | Std Error | Lower 95%<br>CL for Mean | Upper 95%<br>CL for Mean |
|---|-----------|------------|-----------|------------|-----------|-----------|--------------------------|--------------------------|
| 9 | 5.0000000 | 11.0000000 | 8.8888889 | 10.0000000 | 1.9002924 | 0.6334308 | 7.4281949                | 10.3495829               |

GROUP=2=Control\_without

### Analysis Variable : FEMALES

| N | Minimum   | Maximum    | Mean       | Median     | Std Dev   | Std Error | Lower 95%<br>CL for Mean | Upper 95%<br>CL for Mean |
|---|-----------|------------|------------|------------|-----------|-----------|--------------------------|--------------------------|
| 9 | 7.0000000 | 13.0000000 | 10.3333333 | 10.0000000 | 1.8708287 | 0.6236096 | 8.8952871                | 11.7713796               |

GROUP=3=CNP

### Analysis Variable : FEMALES

| N | Minimum   | Maximum    | Mean       | Median     | Std Dev   | Std Error | Lower 95%<br>CL for Mean | Upper 95%<br>CL for Mean |
|---|-----------|------------|------------|------------|-----------|-----------|--------------------------|--------------------------|
| 9 | 9.0000000 | 13.0000000 | 10.3333333 | 10.0000000 | 1.4142136 | 0.4714045 | 9.2462726                | 11.4203941               |

GROUP=4=AgCNP

### Analysis Variable : FEMALES

| N | Minimum | Maximum   | Mean      | Median    | Std Dev   | Std Error | Lower 95%<br>CL for Mean | Upper 95%<br>CL for Mean |
|---|---------|-----------|-----------|-----------|-----------|-----------|--------------------------|--------------------------|
| 8 | 0       | 6.0000000 | 2.1250000 | 2.0000000 | 1.9594095 | 0.6927559 | 0.4868926                | 3.7631074                |

The GLM Procedure  
Least Squares Means  
Adjustment for Multiple Comparisons: Tukey-Kramer

| <b>GROUP</b>             | <b>FEMALES LSMEAN</b> | <b>LSMEAN Number</b> |
|--------------------------|-----------------------|----------------------|
| <b>1=Control_with</b>    | 8.8888889             | 1                    |
| <b>2=Control_without</b> | 10.3333333            | 2                    |
| <b>3=CNP</b>             | 10.3333333            | 3                    |
| <b>4=AgCNP</b>           | 2.1250000             | 4                    |

#### Least Squares Means for effect **GROUP**

Pr > |t| for H0: LSMean(i)=LSMean(j)

Dependent Variable: **FEMALES**

| <b>i/j</b> | <b>1</b> | <b>2</b> | <b>3</b> | <b>4</b> |
|------------|----------|----------|----------|----------|
| <b>1</b>   |          | 0.3368   | 0.3368   | <.0001   |
| <b>2</b>   | 0.3368   |          | 1.0000   | <.0001   |
| <b>3</b>   | 0.3368   | 1.0000   |          | <.0001   |
| <b>4</b>   | <.0001   | <.0001   | <.0001   |          |

| <b>GROUP</b>             | <b>FEMALES LSMEAN</b> | <b>95% Confidence Limits</b> |           |
|--------------------------|-----------------------|------------------------------|-----------|
| <b>1=Control_with</b>    | 8.888889              | 7.669306                     | 10.108471 |
| <b>2=Control_without</b> | 10.333333             | 9.113751                     | 11.552916 |
| <b>3=CNP</b>             | 10.333333             | 9.113751                     | 11.552916 |
| <b>4=AgCNP</b>           | 2.125000              | 0.831437                     | 3.418563  |

## Figure 7b-Egg weight by Group;

AgCNP rejected the normality assumption by the skewness test described above. Thus, we used Kruskal-Wallis which established that at least one median is different.

### The NPAR1WAY Procedure

#### Analysis of Variance for Variable EGGS Classified by Variable GROUP

| GROUP             | N | Mean     |
|-------------------|---|----------|
| 1=Control_with    | 9 | 2.711111 |
| 2=Control_without | 9 | 2.866667 |
| 3=CNP             | 9 | 1.133333 |
| 4=AgCNP           | 6 | 0.633333 |

#### Kruskal-Wallis Test

| Chi-Square | DF | Pr > ChiSq |
|------------|----|------------|
| 11.5990    | 3  | 0.0089     |

GROUP=1=Control\_with

Analysis Variable : EGGS

| N | Minimum | Maximum   | Mean      | Median    | Std Dev   | Std Error | Lower 95%<br>CL for Mean | Upper 95%<br>CL for Mean |
|---|---------|-----------|-----------|-----------|-----------|-----------|--------------------------|--------------------------|
| 9 | 0       | 5.4000000 | 2.7111111 | 2.6000000 | 2.2430138 | 0.7476713 | 0.9869780                | 4.4352442                |

GROUP=2=Control\_without

Analysis Variable : EGGS

| N | Minimum   | Maximum   | Mean      | Median    | Std Dev   | Std Error | Lower 95%<br>CL for Mean | Upper 95%<br>CL for Mean |
|---|-----------|-----------|-----------|-----------|-----------|-----------|--------------------------|--------------------------|
| 9 | 1.1000000 | 4.3000000 | 2.8666667 | 3.0000000 | 1.0185774 | 0.3395258 | 2.0837187                | 3.6496146                |

GROUP=3=CNP

Analysis Variable : EGGS

| N | Minimum   | Maximum   | Mean      | Median    | Std Dev   | Std Error | Lower 95%<br>CL for Mean | Upper 95%<br>CL for Mean |
|---|-----------|-----------|-----------|-----------|-----------|-----------|--------------------------|--------------------------|
| 9 | 0.2000000 | 1.8000000 | 1.1333333 | 1.4000000 | 0.5809475 | 0.1936492 | 0.6867776                | 1.5798891                |

GROUP=4=AgCNP

Analysis Variable : EGGS

| N | Minimum | Maximum   | Mean      | Median    | Std Dev   | Std Error | Lower 95%<br>CL for Mean | Upper 95%<br>CL for Mean |
|---|---------|-----------|-----------|-----------|-----------|-----------|--------------------------|--------------------------|
| 6 | 0       | 2.8000000 | 0.6333333 | 0.2500000 | 1.0782702 | 0.4402020 | -0.4982419               | 1.7649085                |

Group sample sizes not equal, or some ranks tied. Performed Dunn's test, alpha=0.05

Comparison group = GROUP\_NEW

| Compare | Diff                                       | SE   | q    | q(0.05) | Conclude      |
|---------|--------------------------------------------|------|------|---------|---------------|
| 2 vs 4  | 15.78                                      | 5.09 | 3.1  | 2.638   | Reject        |
| 2 vs 3  | 10.06                                      | 4.55 | 2.21 | 2.638   | Do not reject |
| 2 vs 1  | Do not reject (within non-sig. comparison) |      |      |         |               |
| 1 vs 4  | 12.11                                      | 5.09 | 2.38 | 2.638   | Do not reject |
| 1 vs 3  | Do not reject (within non-sig. comparison) |      |      |         |               |
| 3 vs 4  | Do not reject (within non-sig. comparison) |      |      |         |               |

Note: "Do not reject (within non-sig. comparison)" indicates that any comparison within the range of a non-significant comparison must also be non-significant.

Reference: Biostatistical Analysis, 4th Edition, J. Zar, 2010.
