# Supplementary material for: Exposure to nanoceria impacts larval survival, life history traits and fecundity of Aedes aegypti
Source: PubMed Central journal article supplement (PMC7540862; doi:10.1371/journal.pntd.0008654), 2020-09-25
Supplement: pntd.0008654.s008.pdf [file pntd.0008654.s008.pdf]

## Figure 8a-% Eggs Hatched;

The FREQ Procedure

|           |                  | Table of EGGS_HATCHED_YES by GROUP |       |         |       |
|-----------|------------------|------------------------------------|-------|---------|-------|
| Frequency | EGGS_HATCHED_YES | GROUP                              |       |         |       |
| Col Pct   |                  | 1=Contro                           | 2=CNP | 3=AgCNP | Total |
|           | Yes              | 275                                | 431   | 237     | 943   |
|           |                  | 77.25                              | 71.83 | 66.02   |       |
|           | No               | 81                                 | 169   | 122     | 372   |
|           |                  | 22.75                              | 28.17 | 33.98   |       |
|           | Total            | 356                                | 600   | 359     | 1315  |

### Statistics for Table of EGGS\_HATCHED\_YES by GROUP

| Statistic                   | DF | Value   | Prob   |
|-----------------------------|----|---------|--------|
| Chi-Square                  | 2  | 11.1211 | 0.0038 |
| Likelihood Ratio Chi-Square | 2  | 11.1565 | 0.0038 |
| Mantel-Haenszel Chi-Square  | 1  | 11.1062 | 0.0009 |
| Phi Coefficient             |    | 0.0920  |        |
| Contingency Coefficient     |    | 0.0916  |        |
| Cramer's V                  |    | 0.0920  |        |

Sample Size = 1315

Proportion Eggs Hatched with SE by Group

The FREQ Procedure

GROUP=1=Contro

| <b>EGGS_HATCHED_YES</b> | <b>Frequency</b> | <b>Percent</b> | <b>Cumulative<br/>Frequency</b> | <b>Cumulative<br/>Percent</b> |
|-------------------------|------------------|----------------|---------------------------------|-------------------------------|
| <b>Yes</b>              | 275              | 77.25          | 275                             | 77.25                         |
| <b>No</b>               | 81               | 22.75          | 356                             | 100.00                        |

**Binomial Proportion**

**EGGS\_HATCHED\_YES = Yes**

**Proportion** 0.7725

**ASE** 0.0222

**95% Lower Conf Limit** 0.7289

**95% Upper Conf Limit** 0.8160

**Exact Conf Limits**

**95% Lower Conf Limit** 0.7253

**95% Upper Conf Limit** 0.8150

**Test of H0: Proportion = 0.5**

**ASE under H0** 0.0265

**Z** 10.2820

**One-sided Pr > Z** <.0001

**Two-sided Pr > |Z|** <.0001

The FREQ Procedure  
GROUP=2=CNP

| <b>EGGS_HATCHED_YES</b> | <b>Frequency</b> | <b>Percent</b> | <b>Cumulative<br/>Frequency</b> | <b>Cumulative<br/>Percent</b> |
|-------------------------|------------------|----------------|---------------------------------|-------------------------------|
| <b>Yes</b>              | 431              | 71.83          | 431                             | 71.83                         |
| <b>No</b>               | 169              | 28.17          | 600                             | 100.00                        |

### **Binomial Proportion**

**EGGS\_HATCHED\_YES = Yes**

**Proportion** 0.7183

**ASE** 0.0184

**95% Lower Conf Limit** 0.6823

**95% Upper Conf Limit** 0.7543

### **Exact Conf Limits**

**95% Lower Conf Limit** 0.6805

**95% Upper Conf Limit** 0.7540

### **Test of H0: Proportion = 0.5**

**ASE under H0** 0.0204

**Z** 10.6961

**One-sided Pr > Z** <.0001

**Two-sided Pr > |Z|** <.0001

**Sample Size = 600**

Proportion Eggs Hatched with SE by Group

The FREQ Procedure  
GROUP=3=AgCNP

| <b>EGGS_HATCHED_YES</b> | <b>Frequency</b> | <b>Percent</b> | <b>Cumulative<br/>Frequency</b> | <b>Cumulative<br/>Percent</b> |
|-------------------------|------------------|----------------|---------------------------------|-------------------------------|
| <b>Yes</b>              | 237              | 66.02          | 237                             | 66.02                         |
| <b>No</b>               | 122              | 33.98          | 359                             | 100.00                        |

**Binomial Proportion**

**EGGS\_HATCHED\_YES = Yes**

**Proportion** 0.6602

**ASE** 0.0250

**95% Lower Conf Limit** 0.6112

**95% Upper Conf Limit** 0.7092

**Exact Conf Limits**

**95% Lower Conf Limit** 0.6086

**95% Upper Conf Limit** 0.7091

**Test of H0: Proportion = 0.5**

**ASE under H0** 0.0264

**Z** 6.0695

**One-sided Pr > Z** <.0001

**Two-sided Pr > |Z|** <.0001

**Sample Size = 359**

Tukey Style Multiple Comparisons of Proportions

Compare Diff SE q q(.05) Conclude

---

|        |      |      |      |       |   |
|--------|------|------|------|-------|---|
| 1 vs 3 | 7.15 | 1.51 | 4.73 | 3.314 | R |
| 1 vs 2 | 3.54 | 1.35 | 2.62 | 3.314 | A |
| 2 vs 3 | 3.61 | 1.35 | 2.67 | 3.314 | A |

Reference: Biostatistical Analysis, Fourth Edition, Jerrold Zar, 1999, p564.

Tukey Style Multiple Comparisons of Proportions

Compare Diff SE q q(.01) Conclude

---

|        |      |      |      |      |   |
|--------|------|------|------|------|---|
| 1 vs 3 | 7.15 | 1.51 | 4.73 | 4.12 | R |
| 1 vs 2 | 3.54 | 1.35 | 2.62 | 4.12 | A |
| 2 vs 3 | 3.61 | 1.35 | 2.67 | 4.12 | A |

Reference: Biostatistical Analysis, Fourth Edition, Jerrold Zar, 1999, p564.

**Figure 8a-% Adults Emerged;**

The FREQ Procedure

|                      |                    | Table of ADULTS_EMERGED_YES by GROUP |       |         |       |
|----------------------|--------------------|--------------------------------------|-------|---------|-------|
| Frequency<br>Col Pct | ADULTS_EMERGED_YES | GROUP                                |       |         | Total |
|                      |                    | 1=Control                            | 2=CNP | 3=AgCNP |       |
|                      | <b>Yes</b>         | 205                                  | 337   | 169     | 711   |
|                      |                    | 57.58                                | 56.17 | 47.08   |       |
|                      | <b>No</b>          | 151                                  | 263   | 190     | 604   |
|                      |                    | 42.42                                | 43.83 | 52.92   |       |
|                      | <b>Total</b>       | 356                                  | 600   | 359     | 1315  |

**Statistics for Table of ADULTS\_EMERGED\_YES by GROUP**

| Statistic                          | DF | Value  | Prob   |
|------------------------------------|----|--------|--------|
| <b>Chi-Square</b>                  | 2  | 9.9052 | 0.0071 |
| <b>Likelihood Ratio Chi-Square</b> | 2  | 9.8857 | 0.0071 |
| <b>Mantel-Haenszel Chi-Square</b>  | 1  | 7.9652 | 0.0048 |
| <b>Phi Coefficient</b>             |    | 0.0868 |        |
| <b>Contingency Coefficient</b>     |    | 0.0865 |        |
| <b>Cramer's V</b>                  |    | 0.0868 |        |

|                                            |
|--------------------------------------------|
| Proportion Adults Emerged with SE by Group |
|--------------------------------------------|

GROUP=1=Control

| <b>ADULTS_EMERGED_YES</b> | <b>Frequency</b> | <b>Percent</b> | <b>Cumulative<br/>Frequency</b> | <b>Cumulative<br/>Percent</b> |
|---------------------------|------------------|----------------|---------------------------------|-------------------------------|
| <b>Yes</b>                | 205              | 57.58          | 205                             | 57.58                         |
| <b>No</b>                 | 151              | 42.42          | 356                             | 100.00                        |

### **Binomial Proportion**

**ADULTS\_EMERGED\_YES = Yes**

**Proportion** 0.5758

**ASE** 0.0262

**95% Lower Conf Limit** 0.5245

**95% Upper Conf Limit** 0.6272

### **Exact Conf Limits**

**95% Lower Conf Limit** 0.5226

**95% Upper Conf Limit** 0.6278

### **Test of H0: Proportion = 0.5**

**ASE under H0** 0.0265

**Z** 2.8620

**One-sided Pr > Z** 0.0021

**Two-sided Pr > |Z|** 0.0042

**Sample Size = 356**

Proportion Adults Emerged with SE by Group

The FREQ Procedure  
GROUP=2=CNP

| <b>ADULTS_EMERGED_YES</b> | <b>Frequency</b> | <b>Percent</b> | <b>Cumulative<br/>Frequency</b> | <b>Cumulative<br/>Percent</b> |
|---------------------------|------------------|----------------|---------------------------------|-------------------------------|
| <b>Yes</b>                | 337              | 56.17          | 337                             | 56.17                         |
| <b>No</b>                 | 263              | 43.83          | 600                             | 100.00                        |

**Binomial Proportion**

**ADULTS\_EMERGED\_YES = Yes**

**Proportion** 0.5617

**ASE** 0.0203

**95% Lower Conf Limit** 0.5220

**95% Upper Conf Limit** 0.6014

**Exact Conf Limits**

**95% Lower Conf Limit** 0.5209

**95% Upper Conf Limit** 0.6018

**Test of H0: Proportion = 0.5**

**ASE under H0** 0.0204

**Z** 3.0210

**One-sided Pr > Z** 0.0013

**Two-sided Pr > |Z|** 0.0025

**Sample Size = 600**



Proportion Adults Emerged with SE by Group

The FREQ Procedure  
GROUP=3=AgCNP

| <b>ADULTS_EMERGED_YES</b> | <b>Frequency</b> | <b>Percent</b> | <b>Cumulative<br/>Frequency</b> | <b>Cumulative<br/>Percent</b> |
|---------------------------|------------------|----------------|---------------------------------|-------------------------------|
| <b>Yes</b>                | 169              | 47.08          | 169                             | 47.08                         |
| <b>No</b>                 | 190              | 52.92          | 359                             | 100.00                        |

**Binomial Proportion**

**ADULTS\_EMERGED\_YES = Yes**

**Proportion** 0.4708

**ASE** 0.0263

**95% Lower Conf Limit** 0.4191

**95% Upper Conf Limit** 0.5224

**Exact Conf Limits**

**95% Lower Conf Limit** 0.4182

**95% Upper Conf Limit** 0.5238

**Test of H0: Proportion = 0.5**

**ASE under H0** 0.0264

**Z** -1.1083

**One-sided Pr < Z** 0.1339

**Two-sided Pr > |Z|** 0.2677

**Sample Size = 359**

---

Tukey Style Multiple Comparisons of Proportions

Compare Diff SE q q(.05) Conclude

---

|        |      |      |      |       |   |
|--------|------|------|------|-------|---|
| 1 vs 3 | 6.02 | 1.51 | 3.99 | 3.314 | R |
| 1 vs 2 | 0.81 | 1.35 | 0.6  | 3.314 | A |
| 2 vs 3 | 5.21 | 1.35 | 3.86 | 3.314 | R |

Reference: Biostatistical Analysis, Fourth Edition, Jerrold Zar, 1999, p564.

---

---

Tukey Style Multiple Comparisons of Proportions

Compare Diff SE q q(.01) Conclude

---

|        |      |      |      |      |   |
|--------|------|------|------|------|---|
| 1 vs 3 | 6.02 | 1.51 | 3.99 | 4.12 | A |
| 1 vs 2 | 0.81 | 1.35 | 0.6  | 4.12 | A |
| 2 vs 3 | 5.21 | 1.35 | 3.86 | 4.12 | A |

Reference: Biostatistical Analysis, Fourth Edition, Jerrold Zar, 1999, p564.

---

**Figure 8a-% Larvae Pupae;**

The FREQ Procedure

|                      |                  | Table of LARVAE_PUPAE_YES by GROUP |       |         |       |
|----------------------|------------------|------------------------------------|-------|---------|-------|
| Frequency<br>Col Pct | LARVAE_PUPAE_YES | GROUP                              |       |         | Total |
|                      |                  | 1=Control                          | 2=CNP | 3=AgCNP |       |
|                      | <b>Yes</b>       | 70                                 | 95    | 59      | 224   |
|                      |                  | 19.66                              | 15.83 | 16.43   |       |
|                      | <b>No</b>        | 286                                | 505   | 300     | 1091  |
|                      |                  | 80.34                              | 84.17 | 83.57   |       |
|                      | <b>Total</b>     | 356                                | 600   | 359     | 1315  |

Statistics for Table of LARVAE\_PUPAE\_YES by GROUP

| Statistic                   | DF | Value  | Prob   |
|-----------------------------|----|--------|--------|
| Chi-Square                  | 2  | 2.4443 | 0.2946 |
| Likelihood Ratio Chi-Square | 2  | 2.3911 | 0.3025 |
| Mantel-Haenszel Chi-Square  | 1  | 1.3103 | 0.2523 |
| Phi Coefficient             |    | 0.0431 |        |
| Contingency Coefficient     |    | 0.0431 |        |
| Cramer's V                  |    | 0.0431 |        |

The FREQ Procedure  
GROUP=1=Control

| <b>LARVAE_PUPAE_YES</b> | <b>Frequency</b> | <b>Percent</b> | <b>Cumulative<br/>Frequency</b> | <b>Cumulative<br/>Percent</b> |
|-------------------------|------------------|----------------|---------------------------------|-------------------------------|
| <b>Yes</b>              | 70               | 19.66          | 70                              | 19.66                         |
| <b>No</b>               | 286              | 80.34          | 356                             | 100.00                        |

### **Binomial Proportion**

**LARVAE\_PUPAE\_YES = Yes**

**Proportion** 0.1966

**ASE** 0.0211

**95% Lower Conf Limit** 0.1553

**95% Upper Conf Limit** 0.2379

### **Exact Conf Limits**

**95% Lower Conf Limit** 0.1566

**95% Upper Conf Limit** 0.2418

### **Test of H0: Proportion = 0.5**

**ASE under H0** 0.0265

**Z** -11.4480

**One-sided Pr < Z** <.0001

**Two-sided Pr > |Z|** <.0001

**Sample Size = 356**

Proportion Larvae\_Pupae with SE by Group

The FREQ Procedure  
GROUP=2=CNP

| LARVAE_PUPAE_YES | Frequency | Percent | Cumulative<br>Frequency | Cumulative<br>Percent |
|------------------|-----------|---------|-------------------------|-----------------------|
| Yes              | 95        | 15.83   | 95                      | 15.83                 |
| No               | 505       | 84.17   | 600                     | 100.00                |

**Binomial Proportion**

LARVAE\_PUPAE\_YES = Yes

Proportion 0.1583

ASE 0.0149

95% Lower Conf Limit 0.1291

95% Upper Conf Limit 0.1875

**Exact Conf Limits**

95% Lower Conf Limit 0.1300

95% Upper Conf Limit 0.1900

**Test of H0: Proportion = 0.5**

ASE under H0 0.0204

Z -16.7382

One-sided Pr < Z <.0001

Two-sided Pr > |Z| <.0001

**Sample Size = 600**

Proportion Larvae\_Pupae with SE by Group

The FREQ Procedure  
GROUP=3=AgCNP

| LARVAE_PUPAE_YES | Frequency | Percent | Cumulative<br>Frequency | Cumulative<br>Percent |
|------------------|-----------|---------|-------------------------|-----------------------|
| Yes              | 59        | 16.43   | 59                      | 16.43                 |
| No               | 300       | 83.57   | 359                     | 100.00                |

**Binomial Proportion**

LARVAE\_PUPAE\_YES = Yes

Proportion 0.1643

ASE 0.0196

95% Lower Conf Limit 0.1260

95% Upper Conf Limit 0.2027

**Exact Conf Limits**

95% Lower Conf Limit 0.1275

95% Upper Conf Limit 0.2068

**Test of H0: Proportion = 0.5**

ASE under H0 0.0264

Z -12.7195

One-sided Pr < Z <.0001

Two-sided Pr > |Z| <.0001

**Sample Size = 359**

## Figure 8b-% Female;

The FREQ Procedure

| Frequency<br>Col Pct | Table of FEMALE by GROUP |           |       |         |       |
|----------------------|--------------------------|-----------|-------|---------|-------|
|                      | FEMALE                   | GROUP     |       |         |       |
|                      |                          | 1=Control | 2=CNP | 3=AgCNP | Total |
| Yes                  |                          | 73        | 166   | 73      | 312   |
|                      |                          | 35.61     | 49.26 | 43.20   |       |
| No                   |                          | 132       | 171   | 96      | 399   |
|                      |                          | 64.39     | 50.74 | 56.80   |       |
| Total                |                          | 205       | 337   | 169     | 711   |

### Statistics for Table of FEMALE by GROUP

| Statistic                   | DF | Value  | Prob   |
|-----------------------------|----|--------|--------|
| Chi-Square                  | 2  | 9.6843 | 0.0079 |
| Likelihood Ratio Chi-Square | 2  | 9.7648 | 0.0076 |
| Mantel-Haenszel Chi-Square  | 1  | 2.7191 | 0.0992 |
| Phi Coefficient             |    | 0.1167 |        |
| Contingency Coefficient     |    | 0.1159 |        |
| Cramer's V                  |    | 0.1167 |        |

Sample Size = 711

The FREQ Procedure  
GROUP=1=Control

| <b>FEMALE</b> | <b>Frequency</b> | <b>Percent</b> | <b>Cumulative<br/>Frequency</b> | <b>Cumulative<br/>Percent</b> |
|---------------|------------------|----------------|---------------------------------|-------------------------------|
| <b>Yes</b>    | 73               | 35.61          | 73                              | 35.61                         |
| <b>No</b>     | 132              | 64.39          | 205                             | 100.00                        |

### **Binomial Proportion**

**FEMALE = Yes**

|                             |        |
|-----------------------------|--------|
| <b>Proportion</b>           | 0.3561 |
| <b>ASE</b>                  | 0.0334 |
| <b>95% Lower Conf Limit</b> | 0.2905 |
| <b>95% Upper Conf Limit</b> | 0.4216 |

### **Exact Conf Limits**

|                             |        |
|-----------------------------|--------|
| <b>95% Lower Conf Limit</b> | 0.2906 |
| <b>95% Upper Conf Limit</b> | 0.4258 |

### **Test of H0: Proportion = 0.5**

|                              |         |
|------------------------------|---------|
| <b>ASE under H0</b>          | 0.0349  |
| <b>Z</b>                     | -4.1207 |
| <b>One-sided Pr &lt; Z</b>   | <.0001  |
| <b>Two-sided Pr &gt;  Z </b> | <.0001  |

**Sample Size = 205**



Proportion Female with SE by Group

The FREQ Procedure  
GROUP=2=CNP

| <b>FEMALE</b> | <b>Frequency</b> | <b>Percent</b> | <b>Cumulative<br/>Frequency</b> | <b>Cumulative<br/>Percent</b> |
|---------------|------------------|----------------|---------------------------------|-------------------------------|
| <b>Yes</b>    | 166              | 49.26          | 166                             | 49.26                         |
| <b>No</b>     | 171              | 50.74          | 337                             | 100.00                        |

**Binomial Proportion**

**FEMALE = Yes**

|                             |        |
|-----------------------------|--------|
| <b>Proportion</b>           | 0.4926 |
| <b>ASE</b>                  | 0.0272 |
| <b>95% Lower Conf Limit</b> | 0.4392 |
| <b>95% Upper Conf Limit</b> | 0.5460 |

**Exact Conf Limits**

|                             |        |
|-----------------------------|--------|
| <b>95% Lower Conf Limit</b> | 0.4380 |
| <b>95% Upper Conf Limit</b> | 0.5473 |

**Test of H0: Proportion = 0.5**

|                              |         |
|------------------------------|---------|
| <b>ASE under H0</b>          | 0.0272  |
| <b>Z</b>                     | -0.2724 |
| <b>One-sided Pr &lt; Z</b>   | 0.3927  |
| <b>Two-sided Pr &gt;  Z </b> | 0.7853  |

**Sample Size = 337**

Proportion Female with SE by Group

The FREQ Procedure  
GROUP=3=AgCNP

| <b>FEMALE</b> | <b>Frequency</b> | <b>Percent</b> | <b>Cumulative<br/>Frequency</b> | <b>Cumulative<br/>Percent</b> |
|---------------|------------------|----------------|---------------------------------|-------------------------------|
| <b>Yes</b>    | 73               | 43.20          | 73                              | 43.20                         |
| <b>No</b>     | 96               | 56.80          | 169                             | 100.00                        |

**Binomial Proportion**

**FEMALE = Yes**

|                             |        |
|-----------------------------|--------|
| <b>Proportion</b>           | 0.4320 |
| <b>ASE</b>                  | 0.0381 |
| <b>95% Lower Conf Limit</b> | 0.3573 |
| <b>95% Upper Conf Limit</b> | 0.5066 |

**Exact Conf Limits**

|                             |        |
|-----------------------------|--------|
| <b>95% Lower Conf Limit</b> | 0.3561 |
| <b>95% Upper Conf Limit</b> | 0.5102 |

**Test of H0: Proportion = 0.5**

|                              |         |
|------------------------------|---------|
| <b>ASE under H0</b>          | 0.0385  |
| <b>Z</b>                     | -1.7692 |
| <b>One-sided Pr &lt; Z</b>   | 0.0384  |
| <b>Two-sided Pr &gt;  Z </b> | 0.0769  |

**Sample Size = 169**

---

### Tukey Style Multiple Comparisons of Proportions

Compare Diff SE q q(.05) Conclude

---

|        |      |      |      |       |   |
|--------|------|------|------|-------|---|
| 2 vs 1 | 7.9  | 1.79 | 4.41 | 3.314 | R |
| 2 vs 3 | 3.46 | 1.91 | 1.81 | 3.314 | A |
| 3 vs 1 | 4.43 | 2.1  | 2.11 | 3.314 | A |

Reference: Biostatistical Analysis, Fourth Edition, Jerrold Zar, 1999, p564.

---

### Tukey Style Multiple Comparisons of Proportions

Compare Diff SE q q(.01) Conclude

---

|        |      |      |      |      |   |
|--------|------|------|------|------|---|
| 2 vs 1 | 7.9  | 1.79 | 4.41 | 4.12 | R |
| 2 vs 3 | 3.46 | 1.91 | 1.81 | 4.12 | A |
| 3 vs 1 | 4.43 | 2.1  | 2.11 | 4.12 | A |

Reference: Biostatistical Analysis, Fourth Edition, Jerrold Zar, 1999, p564.

---

### Chi-Square Analysis for a 2x3 table

---

### Tukey Style Multiple Comparisons of Proportions

Compare Diff SE q q(.001) Conclude

---

|        |      |      |      |       |   |
|--------|------|------|------|-------|---|
| 2 vs 1 | 7.9  | 1.79 | 4.41 | 5.063 | A |
| 2 vs 3 | 3.46 | 1.91 | 1.81 | 5.063 | A |
| 3 vs 1 | 4.43 | 2.1  | 2.11 | 5.063 | A |

Reference: Biostatistical Analysis, Fourth Edition, Jerrold Zar, 1999, p564.

---

## Figure 8c-% Eggs Hatched by Group;

The FREQ Procedure

|           |                  | Table of EGGS_HATCHED_YES by GROUP |                   |       |         |       |
|-----------|------------------|------------------------------------|-------------------|-------|---------|-------|
| Frequency | EGGS_HATCHED_YES | GROUP                              |                   |       |         |       |
| Col Pct   |                  | 1=Control_with                     | 2=Control_without | 3=CNP | 4=AgCNP | Total |
|           | <b>Yes</b>       | 541                                | 672               | 695   | 121     | 2029  |
|           |                  | 79.68                              | 84.00             | 82.25 | 50.63   |       |
|           | <b>No</b>        | 138                                | 128               | 150   | 118     | 534   |
|           |                  | 20.32                              | 16.00             | 17.75 | 49.37   |       |
|           | <b>Total</b>     | 679                                | 800               | 845   | 239     | 2563  |

**Statistics for Table of EGGS\_HATCHED\_YES by GROUP**

| Statistic                          | DF | Value    | Prob   |
|------------------------------------|----|----------|--------|
| <b>Chi-Square</b>                  | 3  | 134.3220 | <.0001 |
| <b>Likelihood Ratio Chi-Square</b> | 3  | 112.6797 | <.0001 |
| <b>Mantel-Haenszel Chi-Square</b>  | 1  | 33.8700  | <.0001 |
| <b>Phi Coefficient</b>             |    | 0.2289   |        |
| <b>Contingency Coefficient</b>     |    | 0.2232   |        |
| <b>Cramer's V</b>                  |    | 0.2289   |        |

**Sample Size = 2563**

| <b>EGGS_HATCHED_YES</b> | <b>Frequency</b> | <b>Percent</b> | <b>Cumulative<br/>Frequency</b> | <b>Cumulative<br/>Percent</b> |
|-------------------------|------------------|----------------|---------------------------------|-------------------------------|
| <b>Yes</b>              | 541              | 79.68          | 541                             | 79.68                         |
| <b>No</b>               | 138              | 20.32          | 679                             | 100.00                        |

### **Binomial Proportion**

**EGGS\_HATCHED\_YES = Yes**

**Proportion** 0.7968

**ASE** 0.0154

**95% Lower Conf Limit** 0.7665

**95% Upper Conf Limit** 0.8270

### **Exact Conf Limits**

**95% Lower Conf Limit** 0.7645

**95% Upper Conf Limit** 0.8264

### **Test of H0: Proportion = 0.5**

**ASE under H0** 0.0192

**Z** 15.4657

**One-sided Pr > Z** <.0001

**Two-sided Pr > |Z|** <.0001

**Sample Size = 679**

Eggs Hatched with SE by Group

The FREQ Procedure  
GROUP=2=Control\_without

| <b>EGGS_HATCHED_YES</b> | <b>Frequency</b> | <b>Percent</b> | <b>Cumulative<br/>Frequency</b> | <b>Cumulative<br/>Percent</b> |
|-------------------------|------------------|----------------|---------------------------------|-------------------------------|
| <b>Yes</b>              | 672              | 84.00          | 672                             | 84.00                         |
| <b>No</b>               | 128              | 16.00          | 800                             | 100.00                        |

**Binomial Proportion**

**EGGS\_HATCHED\_YES = Yes**

**Proportion** 0.8400

**ASE** 0.0130

**95% Lower Conf Limit** 0.8146

**95% Upper Conf Limit** 0.8654

**Exact Conf Limits**

**95% Lower Conf Limit** 0.8127

**95% Upper Conf Limit** 0.8647

**Test of H0: Proportion = 0.5**

**ASE under H0** 0.0177

**Z** 19.2333

**One-sided Pr > Z** <.0001

**Two-sided Pr > |Z|** <.0001

**Sample Size = 800**

Eggs Hatched with SE by Group

The FREQ Procedure  
GROUP=3=CNP

| <b>EGGS_HATCHED_YES</b> | <b>Frequency</b> | <b>Percent</b> | <b>Cumulative<br/>Frequency</b> | <b>Cumulative<br/>Percent</b> |
|-------------------------|------------------|----------------|---------------------------------|-------------------------------|
| <b>Yes</b>              | 695              | 82.25          | 695                             | 82.25                         |
| <b>No</b>               | 150              | 17.75          | 845                             | 100.00                        |

**Binomial Proportion**

**EGGS\_HATCHED\_YES = Yes**

**Proportion** 0.8225

**ASE** 0.0131

**95% Lower Conf Limit** 0.7967

**95% Upper Conf Limit** 0.8482

**Exact Conf Limits**

**95% Lower Conf Limit** 0.7950

**95% Upper Conf Limit** 0.8477

**Test of H0: Proportion = 0.5**

**ASE under H0** 0.0172

**Z** 18.7486

**One-sided Pr > Z** <.0001

**Two-sided Pr > |Z|** <.0001

**Sample Size = 845**

Eggs Hatched with SE by Group

The FREQ Procedure  
GROUP=4=AgCNP

| <b>EGGS_HATCHED_YES</b> | <b>Frequency</b> | <b>Percent</b> | <b>Cumulative<br/>Frequency</b> | <b>Cumulative<br/>Percent</b> |
|-------------------------|------------------|----------------|---------------------------------|-------------------------------|
| <b>Yes</b>              | 121              | 50.63          | 121                             | 50.63                         |
| <b>No</b>               | 118              | 49.37          | 239                             | 100.00                        |

**Binomial Proportion**

**EGGS\_HATCHED\_YES = Yes**

**Proportion** 0.5063

**ASE** 0.0323

**95% Lower Conf Limit** 0.4429

**95% Upper Conf Limit** 0.5697

**Exact Conf Limits**

**95% Lower Conf Limit** 0.4411

**95% Upper Conf Limit** 0.5713

**Test of H0: Proportion = 0.5**

**ASE under H0** 0.0323

**Z** 0.1941

**One-sided Pr > Z** 0.4231

**Two-sided Pr > |Z|** 0.8461

**Sample Size = 239**



---

### Tukey Style Multiple Comparisons of Proportions

Compare Diff SE q **q(.001)** Conclude

---

|        |       |      |       |       |   |
|--------|-------|------|-------|-------|---|
| 2 vs 4 | 21.03 | 1.49 | 14.12 | 5.309 | R |
| 2 vs 1 | 3.22  | 1.06 | 3.03  | 5.309 | A |
| 2 vs 3 | 1.34  | 1    | 1.34  | 5.309 | A |
| 3 vs 4 | 19.7  | 1.48 | 13.31 | 5.309 | R |
| 3 vs 1 | 1.88  | 1.04 | 1.81  | 5.309 | A |
| 1 vs 4 | 17.82 | 1.52 | 11.72 | 5.309 | R |

Reference: Biostatistical Analysis, Fourth Edition, Jerrold Zar, 1999, p564.

---

**Figure 8c-% Adults Emerged by Group;**

|           |                    | Table of ADULTS_EMERGED_YES by GROUP |                   |       |        |       |
|-----------|--------------------|--------------------------------------|-------------------|-------|--------|-------|
| Frequency | ADULTS_EMERGED_YES | GROUP                                |                   |       |        | Total |
|           |                    | 1=Control_with                       | 2=Control_without | 3=CN  | 4=AgCN |       |
| Col Pct   | S                  | h                                    | t                 | P     | P      |       |
| Yes       |                    | 392                                  | 493               | 525   | 100    | 1510  |
|           |                    | 57.73                                | 61.63             | 62.13 | 41.84  |       |
| No        |                    | 287                                  | 307               | 320   | 139    | 1053  |
|           |                    | 42.27                                | 38.38             | 37.87 | 58.16  |       |
| Total     |                    | 679                                  | 800               | 845   | 239    | 2563  |

**Statistics for Table of ADULTS\_EMERGED\_YES by GROUP**

| Statistic                   | DF | Value   | Prob   |
|-----------------------------|----|---------|--------|
| Chi-Square                  | 3  | 35.2133 | <.0001 |
| Likelihood Ratio Chi-Square | 3  | 34.6482 | <.0001 |
| Mantel-Haenszel Chi-Square  | 1  | 3.8378  | 0.0501 |
| Phi Coefficient             |    | 0.1172  |        |
| Contingency Coefficient     |    | 0.1164  |        |
| Cramer's V                  |    | 0.1172  |        |

| <b>ADULTS_EMERGED_YES</b> | <b>Frequency</b> | <b>Percent</b> | <b>Cumulative<br/>Frequency</b> | <b>Cumulative<br/>Percent</b> |
|---------------------------|------------------|----------------|---------------------------------|-------------------------------|
| <b>Yes</b>                | 392              | 57.73          | 392                             | 57.73                         |
| <b>No</b>                 | 287              | 42.27          | 679                             | 100.00                        |

**Binomial Proportion**

**ADULTS\_EMERGED\_YES = Yes**

**Proportion** 0.5773

**ASE** 0.0190

**95% Lower Conf Limit** 0.5402

**95% Upper Conf Limit** 0.6145

**Exact Conf Limits**

**95% Lower Conf Limit** 0.5392

**95% Upper Conf Limit** 0.6148

**Test of H0: Proportion = 0.5**

**ASE under H0** 0.0192

**Z** 4.0295

**One-sided Pr > Z** <.0001

**Two-sided Pr > |Z|** <.0001

**Sample Size = 679**

Adults Emerged with SE by Group

The FREQ Procedure  
GROUP=2=Control\_without

| <b>ADULTS_EMERGED_YES</b> | <b>Frequency</b> | <b>Percent</b> | <b>Cumulative<br/>Frequency</b> | <b>Cumulative<br/>Percent</b> |
|---------------------------|------------------|----------------|---------------------------------|-------------------------------|
| <b>Yes</b>                | 493              | 61.63          | 493                             | 61.63                         |
| <b>No</b>                 | 307              | 38.38          | 800                             | 100.00                        |

**Binomial Proportion**

**ADULTS\_EMERGED\_YES = Yes**

**Proportion** 0.6163

**ASE** 0.0172

**95% Lower Conf Limit** 0.5826

**95% Upper Conf Limit** 0.6499

**Exact Conf Limits**

**95% Lower Conf Limit** 0.5815

**95% Upper Conf Limit** 0.6501

**Test of H0: Proportion = 0.5**

**ASE under H0** 0.0177

**Z** 6.5761

**One-sided Pr > Z** <.0001

**Two-sided Pr > |Z|** <.0001

**Sample Size = 800**

## Adults Emerged with SE by Group

The FREQ Procedure

GROUP=3=CNP

| <b>ADULTS_EMERGED_YES</b> | <b>Frequency</b> | <b>Percent</b> | <b>Cumulative<br/>Frequency</b> | <b>Cumulative<br/>Percent</b> |
|---------------------------|------------------|----------------|---------------------------------|-------------------------------|
| <b>Yes</b>                | 525              | 62.13          | 525                             | 62.13                         |
| <b>No</b>                 | 320              | 37.87          | 845                             | 100.00                        |

### **Binomial Proportion**

**ADULTS\_EMERGED\_YES = Yes**

**Proportion** 0.6213

**ASE** 0.0167

**95% Lower Conf Limit** 0.5886

**95% Upper Conf Limit** 0.6540

### **Exact Conf Limits**

**95% Lower Conf Limit** 0.5876

**95% Upper Conf Limit** 0.6541

### **Test of H0: Proportion = 0.5**

**ASE under H0** 0.0172

**Z** 7.0522

**One-sided Pr > Z** <.0001

**Two-sided Pr > |Z|** <.0001

**Sample Size = 845**

Adults Emerged with SE by Group

The FREQ Procedure  
GROUP=4=AgCNP

| <b>ADULTS_EMERGED_YES</b> | <b>Frequency</b> | <b>Percent</b> | <b>Cumulative<br/>Frequency</b> | <b>Cumulative<br/>Percent</b> |
|---------------------------|------------------|----------------|---------------------------------|-------------------------------|
| <b>Yes</b>                | 100              | 41.84          | 100                             | 41.84                         |
| <b>No</b>                 | 139              | 58.16          | 239                             | 100.00                        |

**Binomial Proportion**

**ADULTS\_EMERGED\_YES = Yes**

**Proportion** 0.4184

**ASE** 0.0319

**95% Lower Conf Limit** 0.3559

**95% Upper Conf Limit** 0.4810

**Exact Conf Limits**

**95% Lower Conf Limit** 0.3551

**95% Upper Conf Limit** 0.4837

**Test of H0: Proportion = 0.5**

**ASE under H0** 0.0323

**Z** -2.5227

**One-sided Pr < Z** 0.0058

**Two-sided Pr > |Z|** 0.0116

**Sample Size = 239**

### Tukey Style Multiple Comparisons of Proportions

Compare Diff SE q **q(.001)** Conclude

---

|        |       |      |      |       |   |
|--------|-------|------|------|-------|---|
| 3 vs 4 | 11.69 | 1.48 | 7.9  | 5.309 | R |
| 3 vs 1 | 2.57  | 1.04 | 2.47 | 5.309 | A |
| 3 vs 2 | 0.3   | 1    | 0.3  | 5.309 | A |
| 2 vs 4 | 11.39 | 1.49 | 7.65 | 5.309 | R |
| 2 vs 1 | 2.27  | 1.06 | 2.14 | 5.309 | A |
| 1 vs 4 | 9.12  | 1.52 | 6    | 5.309 | R |

Reference: Biostatistical Analysis, Fourth Edition, Jerrold Zar, 1999, p564.

**Figure 8c-% Larvae Pupae by Group;**

The FREQ Procedure

|           |                  | Table of LARVAE_PUPAE_YES by GROUP |                   |       |         |       |
|-----------|------------------|------------------------------------|-------------------|-------|---------|-------|
| Frequency | LARVAE_PUPAE_YES | GROUP                              |                   |       |         |       |
| Col Pct   |                  | 1=Control_with                     | 2=Control_without | 3=CNP | 4=AgCNP | Total |
| Yes       |                  | 147                                | 179               | 160   | 21      | 507   |
|           |                  | 21.65                              | 22.38             | 18.93 | 8.79    |       |
| No        |                  | 532                                | 621               | 685   | 218     | 2056  |
|           |                  | 78.35                              | 77.63             | 81.07 | 91.21   |       |
| Total     |                  | 679                                | 800               | 845   | 239     | 2563  |

## Statistics for Table of LARVAE\_PUPAE\_YES by GROUP

| Statistic                   | DF | Value   | Prob   |
|-----------------------------|----|---------|--------|
| Chi-Square                  | 3  | 23.4730 | <.0001 |
| Likelihood Ratio Chi-Square | 3  | 27.0513 | <.0001 |
| Mantel-Haenszel Chi-Square  | 1  | 14.2410 | 0.0002 |
| Phi Coefficient             |    | 0.0957  |        |
| Contingency Coefficient     |    | 0.0953  |        |
| Cramer's V                  |    | 0.0957  |        |

Sample Size = 2563

The FREQ Procedure



GROUP=1=Control\_with

| <b>LARVAE_PUPAE_YES</b> | <b>Frequency</b> | <b>Percent</b> | <b>Cumulative<br/>Frequency</b> | <b>Cumulative<br/>Percent</b> |
|-------------------------|------------------|----------------|---------------------------------|-------------------------------|
| <b>Yes</b>              | 147              | 21.65          | 147                             | 21.65                         |
| <b>No</b>               | 532              | 78.35          | 679                             | 100.00                        |

### **Binomial Proportion**

**LARVAE\_PUPAE\_YES = Yes**

**Proportion** 0.2165

**ASE** 0.0158

**95% Lower Conf Limit** 0.1855

**95% Upper Conf Limit** 0.2475

### **Exact Conf Limits**

**95% Lower Conf Limit** 0.1861

**95% Upper Conf Limit** 0.2494

### **Test of H0: Proportion = 0.5**

**ASE under H0** 0.0192

**Z** -14.7749

**One-sided Pr < Z** <.0001

**Two-sided Pr > |Z|** <.0001

**Sample Size = 679**

Larvae Pupae with SE by Group

The FREQ Procedure  
GROUP=2=Control\_without

| LARVAE_PUPAE_YES | Frequency | Percent | Cumulative<br>Frequency | Cumulative<br>Percent |
|------------------|-----------|---------|-------------------------|-----------------------|
| Yes              | 179       | 22.38   | 179                     | 22.38                 |
| No               | 621       | 77.63   | 800                     | 100.00                |

**Binomial Proportion**

|                        |        |
|------------------------|--------|
| LARVAE_PUPAE_YES = Yes |        |
| Proportion             | 0.2238 |
| ASE                    | 0.0147 |
| 95% Lower Conf Limit   | 0.1949 |
| 95% Upper Conf Limit   | 0.2526 |

**Exact Conf Limits**

|                      |        |
|----------------------|--------|
| 95% Lower Conf Limit | 0.1953 |
| 95% Upper Conf Limit | 0.2542 |

**Test of H0: Proportion = 0.5**

|                   |          |
|-------------------|----------|
| ASE under H0      | 0.0177   |
| Z                 | -15.6271 |
| One-sided Pr < Z  | <.0001   |
| Two-sided Pr >  Z | <.0001   |

**Sample Size = 800**

Larvae Pupae with SE by Group

The FREQ Procedure

GROUP=3=CNP

| <b>LARVAE_PUPAE_YES</b> | <b>Frequency</b> | <b>Percent</b> | <b>Cumulative<br/>Frequency</b> | <b>Cumulative<br/>Percent</b> |
|-------------------------|------------------|----------------|---------------------------------|-------------------------------|
| <b>Yes</b>              | 160              | 18.93          | 160                             | 18.93                         |
| <b>No</b>               | 685              | 81.07          | 845                             | 100.00                        |

**Binomial Proportion**

**LARVAE\_PUPAE\_YES = Yes**

**Proportion** 0.1893

**ASE** 0.0135

**95% Lower Conf Limit** 0.1629

**95% Upper Conf Limit** 0.2158

**Exact Conf Limits**

**95% Lower Conf Limit** 0.1635

**95% Upper Conf Limit** 0.2174

**Test of H0: Proportion = 0.5**

**ASE under H0** 0.0172

**Z** -18.0605

**One-sided Pr < Z** <.0001

**Two-sided Pr > |Z|** <.0001

**Sample Size = 845**

Larvae Pupae with SE by Group

The FREQ Procedure  
GROUP=4=AgCNP

| LARVAE_PUPAE_YES | Frequency | Percent | Cumulative Frequency | Cumulative Percent |
|------------------|-----------|---------|----------------------|--------------------|
| Yes              | 21        | 8.79    | 21                   | 8.79               |
| No               | 218       | 91.21   | 239                  | 100.00             |

**Binomial Proportion**

**LARVAE\_PUPAE\_YES = Yes**

|                             |        |
|-----------------------------|--------|
| <b>Proportion</b>           | 0.0879 |
| <b>ASE</b>                  | 0.0183 |
| <b>95% Lower Conf Limit</b> | 0.0520 |
| <b>95% Upper Conf Limit</b> | 0.1238 |

**Exact Conf Limits**

|                             |        |
|-----------------------------|--------|
| <b>95% Lower Conf Limit</b> | 0.0552 |
| <b>95% Upper Conf Limit</b> | 0.1312 |

**Test of H0: Proportion = 0.5**

|                              |          |
|------------------------------|----------|
| <b>ASE under H0</b>          | 0.0323   |
| <b>Z</b>                     | -12.7429 |
| <b>One-sided Pr &lt; Z</b>   | <.0001   |
| <b>Two-sided Pr &gt;  Z </b> | <.0001   |

**Sample Size = 239**

Tukey Style Multiple Comparisons of Proportions

Compare Diff SE q **q(.001)** Conclude

|        |       |      |      |       |   |
|--------|-------|------|------|-------|---|
| 2 vs 4 | 10.84 | 1.49 | 7.28 | 5.309 | R |
| 2 vs 3 | 2.43  | 1    | 2.43 | 5.309 | A |
| 2 vs 1 | 0.5   | 1.06 | 0.47 | 5.309 | A |
| 1 vs 4 | 10.35 | 1.52 | 6.81 | 5.309 | R |
| 1 vs 3 | 1.94  | 1.04 | 1.86 | 5.309 | A |
| 3 vs 4 | 8.41  | 1.48 | 5.68 | 5.309 | R |

Reference: Biostatistical Analysis, Fourth Edition, Jerrold Zar, 1999, p564.

## Figure 8d-% Female by Group;

Chi-Square Analysis for a 2x5 table

The FREQ Procedure

| Frequency |              | Table of FEMALE by GROUP |           |       |         |       |
|-----------|--------------|--------------------------|-----------|-------|---------|-------|
|           |              | GROUP                    |           |       |         | Total |
| Col Pct   | FEMALE       | 1=Control                | 2=Control | 3=CNP | 4=AgCNP |       |
|           | <b>Yes</b>   | 159                      | 195       | 244   | 51      | 649   |
|           |              | 40.56                    | 39.55     | 46.48 | 51.00   |       |
|           | <b>No</b>    | 233                      | 298       | 281   | 49      | 861   |
|           |              | 59.44                    | 60.45     | 53.52 | 49.00   |       |
|           | <b>Total</b> | 392                      | 493       | 525   | 100     | 1510  |

### Statistics for Table of FEMALE by GROUP

| Statistic                   | DF | Value  | Prob   |
|-----------------------------|----|--------|--------|
| Chi-Square                  | 3  | 8.5404 | 0.0361 |
| Likelihood Ratio Chi-Square | 3  | 8.5192 | 0.0364 |
| Mantel-Haenszel Chi-Square  | 1  | 6.3126 | 0.0120 |
| Phi Coefficient             |    | 0.0752 |        |
| Contingency Coefficient     |    | 0.0750 |        |
| Cramer's V                  |    | 0.0752 |        |

Sample Size = 1510

Proportion Female with SE by Group

The FREQ Procedure  
GROUP=1=Control

| <b>FEMALE</b> | <b>Frequency</b> | <b>Percent</b> | <b>Cumulative<br/>Frequency</b> | <b>Cumulative<br/>Percent</b> |
|---------------|------------------|----------------|---------------------------------|-------------------------------|
| <b>Yes</b>    | 159              | 40.56          | 159                             | 40.56                         |
| <b>No</b>     | 233              | 59.44          | 392                             | 100.00                        |

**Binomial Proportion**

**FEMALE = Yes**

|                             |        |
|-----------------------------|--------|
| <b>Proportion</b>           | 0.4056 |
| <b>ASE</b>                  | 0.0248 |
| <b>95% Lower Conf Limit</b> | 0.3570 |
| <b>95% Upper Conf Limit</b> | 0.4542 |

**Exact Conf Limits**

|                             |        |
|-----------------------------|--------|
| <b>95% Lower Conf Limit</b> | 0.3566 |
| <b>95% Upper Conf Limit</b> | 0.4561 |

**Test of H0: Proportion = 0.5**

|                              |         |
|------------------------------|---------|
| <b>ASE under H0</b>          | 0.0253  |
| <b>Z</b>                     | -3.7376 |
| <b>One-sided Pr &lt; Z</b>   | <.0001  |
| <b>Two-sided Pr &gt;  Z </b> | 0.0002  |

**Sample Size = 392**

Proportion Female with SE by Group

The FREQ Procedure  
GROUP=2=Control

| <b>FEMALE</b> | <b>Frequency</b> | <b>Percent</b> | <b>Cumulative<br/>Frequency</b> | <b>Cumulative<br/>Percent</b> |
|---------------|------------------|----------------|---------------------------------|-------------------------------|
| <b>Yes</b>    | 195              | 39.55          | 195                             | 39.55                         |
| <b>No</b>     | 298              | 60.45          | 493                             | 100.00                        |

**Binomial Proportion**

**FEMALE = Yes**

|                             |        |
|-----------------------------|--------|
| <b>Proportion</b>           | 0.3955 |
| <b>ASE</b>                  | 0.0220 |
| <b>95% Lower Conf Limit</b> | 0.3524 |
| <b>95% Upper Conf Limit</b> | 0.4387 |

**Exact Conf Limits**

|                             |        |
|-----------------------------|--------|
| <b>95% Lower Conf Limit</b> | 0.3521 |
| <b>95% Upper Conf Limit</b> | 0.4402 |

**Test of H0: Proportion = 0.5**

|                              |         |
|------------------------------|---------|
| <b>ASE under H0</b>          | 0.0225  |
| <b>Z</b>                     | -4.6389 |
| <b>One-sided Pr &lt; Z</b>   | <.0001  |
| <b>Two-sided Pr &gt;  Z </b> | <.0001  |

**Sample Size = 493**

Proportion Female with SE by Group

The FREQ Procedure  
GROUP=3=CNP

| <b>FEMALE</b> | <b>Frequency</b> | <b>Percent</b> | <b>Cumulative<br/>Frequency</b> | <b>Cumulative<br/>Percent</b> |
|---------------|------------------|----------------|---------------------------------|-------------------------------|
| <b>Yes</b>    | 244              | 46.48          | 244                             | 46.48                         |
| <b>No</b>     | 281              | 53.52          | 525                             | 100.00                        |

**Binomial Proportion**

**FEMALE = Yes**

|                             |        |
|-----------------------------|--------|
| <b>Proportion</b>           | 0.4648 |
| <b>ASE</b>                  | 0.0218 |
| <b>95% Lower Conf Limit</b> | 0.4221 |
| <b>95% Upper Conf Limit</b> | 0.5074 |

**Exact Conf Limits**

|                             |        |
|-----------------------------|--------|
| <b>95% Lower Conf Limit</b> | 0.4214 |
| <b>95% Upper Conf Limit</b> | 0.5085 |

**Test of H0: Proportion = 0.5**

|                              |         |
|------------------------------|---------|
| <b>ASE under H0</b>          | 0.0218  |
| <b>Z</b>                     | -1.6148 |
| <b>One-sided Pr &lt; Z</b>   | 0.0532  |
| <b>Two-sided Pr &gt;  Z </b> | 0.1064  |

**Sample Size = 525**



Proportion Female with SE by Group

The FREQ Procedure  
GROUP=4=AgCNP

| <b>FEMALE</b> | <b>Frequency</b> | <b>Percent</b> | <b>Cumulative<br/>Frequency</b> | <b>Cumulative<br/>Percent</b> |
|---------------|------------------|----------------|---------------------------------|-------------------------------|
| <b>Yes</b>    | 51               | 51.00          | 51                              | 51.00                         |
| <b>No</b>     | 49               | 49.00          | 100                             | 100.00                        |

**Binomial Proportion**

**FEMALE = Yes**

|                             |        |
|-----------------------------|--------|
| <b>Proportion</b>           | 0.5100 |
| <b>ASE</b>                  | 0.0500 |
| <b>95% Lower Conf Limit</b> | 0.4120 |
| <b>95% Upper Conf Limit</b> | 0.6080 |

**Exact Conf Limits**

|                             |        |
|-----------------------------|--------|
| <b>95% Lower Conf Limit</b> | 0.4080 |
| <b>95% Upper Conf Limit</b> | 0.6114 |

**Test of H0: Proportion = 0.5**

|                              |        |
|------------------------------|--------|
| <b>ASE under H0</b>          | 0.0500 |
| <b>Z</b>                     | 0.2000 |
| <b>One-sided Pr &gt; Z</b>   | 0.4207 |
| <b>Two-sided Pr &gt;  Z </b> | 0.8415 |

**Sample Size = 100**

---

### Tukey Style Multiple Comparisons of Proportions

Compare Diff SE q q(.05) Conclude

---

|        |      |      |      |       |   |
|--------|------|------|------|-------|---|
| 4 vs 2 | 6.59 | 2.22 | 2.97 | 3.633 | A |
| 4 vs 1 | 6    | 2.26 | 2.65 | 3.633 | A |
| 4 vs 3 | 2.58 | 2.21 | 1.17 | 3.633 | A |
| 3 vs 2 | 4    | 1.27 | 3.15 | 3.633 | A |
| 3 vs 1 | 3.41 | 1.35 | 2.53 | 3.633 | A |
| 1 vs 2 | 0.59 | 1.37 | 0.43 | 3.633 | A |

Reference: Biostatistical Analysis, Fourth Edition, Jerrold Zar, 1999, p564.

---

OK, this is interesting. Although the overall chi-square was significant, after adjusting the p-values for multiple comparisons, no comparison met the significance test at the  $\alpha = 0.05$  level.
