# Supplementary material for: Exposure to nanoceria impacts larval survival, life history traits and fecundity of Aedes aegypti
Source: PubMed Central journal article supplement (PMC7540862; doi:10.1371/journal.pntd.0008654), 2020-09-25
Supplement: pntd.0008654.s009.pdf [file pntd.0008654.s009.pdf]

**Figure 9a-Body length by Group;**

The NPAR1WAY Procedure

**Wilcoxon Scores (Rank Sums) for Variable BODY\_LENGTH  
Classified by Variable GROUP**

| GROUP     | N | Sum of Scores | Expected Under H0 | Std Dev Under H0 | Mean Score |
|-----------|---|---------------|-------------------|------------------|------------|
| 1=Control | 4 | 34.0          | 32.0              | 7.338094         | 8.500000   |
| 2=CNP     | 6 | 41.0          | 48.0              | 8.129312         | 6.833333   |
| 3=AgCNP   | 5 | 45.0          | 40.0              | 7.822434         | 9.000000   |

Average scores were used for ties.

**Kruskal-Wallis Test**

Chi-Square DF Pr > ChiSq

0.7717 2 0.6799

The MEANS Procedure

GROUP=1=Control

**Analysis Variable : BODY\_LENGTH**

| N | Minimum   | Maximum   | Mean      | Median    | Std Dev   | Std Error | Lower 95% CL for Mean | Upper 95% CL for Mean |
|---|-----------|-----------|-----------|-----------|-----------|-----------|-----------------------|-----------------------|
| 4 | 2.2800000 | 2.8000000 | 2.5200000 | 2.5000000 | 0.2286190 | 0.1143095 | 2.1562161             | 2.8837839             |

GROUP=2=CNP

**Analysis Variable : BODY\_LENGTH**

| N | Minimum   | Maximum   | Mean      | Median    | Std Dev   | Std Error | Lower 95% CL for Mean | Upper 95% CL for Mean |
|---|-----------|-----------|-----------|-----------|-----------|-----------|-----------------------|-----------------------|
| 6 | 2.3200000 | 2.4000000 | 2.3866667 | 2.4000000 | 0.0326599 | 0.0133333 | 2.3523922             | 2.4209411             |

GROUP=3=AgCNP

**Analysis Variable : BODY\_LENGTH**

| N | Minimum   | Maximum   | Mean      | Median    | Std Dev   | Std Error | Lower 95% CL for Mean | Upper 95% CL for Mean |
|---|-----------|-----------|-----------|-----------|-----------|-----------|-----------------------|-----------------------|
| 5 | 2.0000000 | 2.8000000 | 2.5440000 | 2.8000000 | 0.3683477 | 0.1647301 | 2.0866360             | 3.0013640             |

**Figure 9a-Body width by Group;**

The NPAR1WAY Procedure

**Wilcoxon Scores (Rank Sums) for Variable BODY\_WIDTH  
Classified by Variable GROUP**

| GROUP     | N | Sum of Scores | Expected Under H0 | Std Dev Under H0 | Mean Score |
|-----------|---|---------------|-------------------|------------------|------------|
| 1=Control | 4 | 42.00         | 32.0              | 6.400149         | 10.500     |
| 2=CNP     | 6 | 40.50         | 48.0              | 7.090235         | 6.750      |
| 3=AgCNP   | 5 | 37.50         | 40.0              | 6.822582         | 7.500      |

Average scores were used for ties.

**Kruskal-Wallis Test**

Chi-Square DF Pr > ChiSq

2.5512 2 0.2793

The MEANS Procedure

GROUP=1=Control

**Analysis Variable : BODY\_WIDTH**

| N | Minimum   | Maximum   | Mean      | Median    | Std Dev | Std Error | Lower 95% CL for Mean | Upper 95% CL for Mean |
|---|-----------|-----------|-----------|-----------|---------|-----------|-----------------------|-----------------------|
| 4 | 1.0000000 | 1.0000000 | 1.0000000 | 1.0000000 | 0       | 0         | .                     | .                     |

GROUP=2=CNP

**Analysis Variable : BODY\_WIDTH**

| N | Minimum   | Maximum   | Mean      | Median    | Std Dev   | Std Error | Lower 95% CL for Mean | Upper 95% CL for Mean |
|---|-----------|-----------|-----------|-----------|-----------|-----------|-----------------------|-----------------------|
| 6 | 0.7500000 | 1.0000000 | 0.8750000 | 0.8750000 | 0.1369306 | 0.0559017 | 0.7313001             | 1.0186999             |

GROUP=3=AgCNP

**Analysis Variable : BODY\_WIDTH**

| N | Minimum   | Maximum   | Mean      | Median    | Std Dev   | Std Error | Lower 95% CL for Mean | Upper 95% CL for Mean |
|---|-----------|-----------|-----------|-----------|-----------|-----------|-----------------------|-----------------------|
| 5 | 0.4000000 | 1.0000000 | 0.8560000 | 1.0000000 | 0.2601538 | 0.1163443 | 0.5329764             | 1.1790236             |

**Figure 9a-Wing length by Group;**

The NPAR1WAY Procedure

**Van der Waerden Scores (Normal) for Variable WING\_LENGTH  
Classified by Variable GROUP**

| GROUP     | N | Sum of Scores | Expected Under H0 | Std Dev Under H0 | Mean Score |
|-----------|---|---------------|-------------------|------------------|------------|
| 1=Control | 4 | -0.202077     | 0.0               | 1.426732         | -0.050519  |
| 2=CNP     | 6 | -2.051709     | 0.0               | 1.580567         | -0.341951  |
| 3=AgCNP   | 5 | 2.253786      | 0.0               | 1.520901         | 0.450757   |

Average scores were used for ties.

**Van der Waerden One-Way Analysis**

| Chi-Square | DF | Pr > ChiSq |
|------------|----|------------|
| 2.4897     | 2  | 0.2880     |

GROUP=1=Control

**Analysis Variable : WING\_LENGTH**

| N | Minimum   | Maximum   | Mean      | Median    | Std Dev   | Std Error | Lower 95% CL for Mean | Upper 95% CL for Mean |
|---|-----------|-----------|-----------|-----------|-----------|-----------|-----------------------|-----------------------|
| 4 | 2.8000000 | 3.4000000 | 3.1000000 | 3.1000000 | 0.2581989 | 0.1290994 | 2.6891479             | 3.5108521             |

GROUP=2=CNP

**Analysis Variable : WING\_LENGTH**

| N | Minimum   | Maximum   | Mean      | Median    | Std Dev   | Std Error | Lower 95% CL for Mean | Upper 95% CL for Mean |
|---|-----------|-----------|-----------|-----------|-----------|-----------|-----------------------|-----------------------|
| 6 | 2.8000000 | 3.2000000 | 3.0166667 | 3.0500000 | 0.1834848 | 0.0749074 | 2.8241112             | 3.2092221             |

GROUP=3=AgCNP

**Analysis Variable : WING\_LENGTH**

| N | Minimum   | Maximum   | Mean      | Median    | Std Dev   | Std Error | Lower 95% CL for Mean | Upper 95% CL for Mean |
|---|-----------|-----------|-----------|-----------|-----------|-----------|-----------------------|-----------------------|
| 5 | 2.7000000 | 3.4000000 | 3.2600000 | 3.4000000 | 0.3130495 | 0.1400000 | 2.8712977             | 3.6487023             |

**Figure 9a-Wing width by Group;**

The NPAR1WAY Procedure

**Wilcoxon Scores (Rank Sums) for Variable WING\_WIDTH  
Classified by Variable GROUP**

| GROUP     | N | Sum of Scores | Expected Under H0 | Std Dev Under H0 | Mean Score |
|-----------|---|---------------|-------------------|------------------|------------|
| 1=Control | 4 | 29.0          | 32.0              | 6.350853         | 7.250000   |
| 2=CNP     | 6 | 47.0          | 48.0              | 7.035624         | 7.833333   |
| 3=AgCNP   | 5 | 44.0          | 40.0              | 6.770032         | 8.800000   |

Average scores were used for ties.

**Kruskal-Wallis Test**

Chi-Square DF Pr > ChiSq

0.4085 2 **0.8153**

The MEANS Procedure

GROUP=1=Control

**Analysis Variable : WING\_WIDTH**

| N | Minimum   | Maximum   | Mean      | Median    | Std Dev   | Std Error | Lower 95% CL for Mean | Upper 95% CL for Mean |
|---|-----------|-----------|-----------|-----------|-----------|-----------|-----------------------|-----------------------|
| 4 | 0.8000000 | 0.9000000 | 0.8250000 | 0.8000000 | 0.0500000 | 0.0250000 | 0.7454388             | 0.9045612             |

GROUP=2=CNP

**Analysis Variable : WING\_WIDTH**

| N | Minimum   | Maximum   | Mean      | Median    | Std Dev   | Std Error | Lower 95% CL for Mean | Upper 95% CL for Mean |
|---|-----------|-----------|-----------|-----------|-----------|-----------|-----------------------|-----------------------|
| 6 | 0.8000000 | 0.9000000 | 0.8333333 | 0.8000000 | 0.0516398 | 0.0210819 | 0.7791407             | 0.8875260             |

GROUP=3=AgCNP

**Analysis Variable : WING\_WIDTH**

| N | Minimum   | Maximum   | Mean      | Median    | Std Dev   | Std Error | Lower 95% CL for Mean | Upper 95% CL for Mean |
|---|-----------|-----------|-----------|-----------|-----------|-----------|-----------------------|-----------------------|
| 5 | 0.8000000 | 1.0000000 | 0.8600000 | 0.8000000 | 0.0894427 | 0.0400000 | 0.7489422             | 0.9710578             |

**Figure 9b-Body Length by Group;**

**For all hypothesis tests in 9b, we will use the nonparametric Kruskal-Wallis test due to small sample size.**

The NPAR1WAY Procedure

**Analysis of Variance for Variable BODY\_LENGTH  
Classified by Variable GROUP**

| GROUP             | N | Mean     |
|-------------------|---|----------|
| 1=Control_with    | 6 | 2.346667 |
| 2=Control_without | 6 | 2.253333 |
| 3=CNP             | 6 | 2.200000 |
| 4=AgCNP           | 3 | 2.866667 |

**Kruskal-Wallis Test**

**Chi-Square DF Pr > ChiSq**

6.8614 3 0.0764

**Did not reach formal statistical significance so multiple comparisons not indicated.**

The MEANS Procedure

GROUP=1=Control\_with

**Analysis Variable : BODY\_LENGTH**

| N | Minimum   | Maximum   | Mean      | Median    | Std Dev   | Std Error | Lower<br>95%<br>CL for<br>Mean | Upper<br>95%<br>CL for<br>Mean |
|---|-----------|-----------|-----------|-----------|-----------|-----------|--------------------------------|--------------------------------|
| 6 | 2.0000000 | 2.8000000 | 2.3466667 | 2.3400000 | 0.2673325 | 0.1091380 | 2.0661184                      | 2.6272149                      |

GROUP=2=Control\_without

**Analysis Variable : BODY\_LENGTH**

| N | Minimum   | Maximum   | Mean      | Median    | Std Dev   | Std Error | Lower<br>95%<br>CL for<br>Mean | Upper<br>95%<br>CL for<br>Mean |
|---|-----------|-----------|-----------|-----------|-----------|-----------|--------------------------------|--------------------------------|
| 6 | 2.0000000 | 2.8000000 | 2.2533333 | 2.1600000 | 0.3216623 | 0.1313181 | 1.9157694                      | 2.5908973                      |

GROUP=3=CNP

**Analysis Variable : BODY\_LENGTH**

| N | Minimum   | Maximum   | Mean      | Median    | Std Dev   | Std Error | Lower 95% CL for Mean | Upper 95% CL for Mean |
|---|-----------|-----------|-----------|-----------|-----------|-----------|-----------------------|-----------------------|
| 6 | 1.9000000 | 2.4000000 | 2.2000000 | 2.2000000 | 0.1673320 | 0.0683130 | 2.0243958             | 2.3756042             |

GROUP=4=AgCNP

**Analysis Variable : BODY\_LENGTH**

| N | Minimum   | Maximum   | Mean      | Median    | Std Dev   | Std Error | Lower 95% CL for Mean | Upper 95% CL for Mean |
|---|-----------|-----------|-----------|-----------|-----------|-----------|-----------------------|-----------------------|
| 3 | 2.6000000 | 3.2000000 | 2.8666667 | 2.8000000 | 0.3055050 | 0.1763834 | 2.1077501             | 3.6255833             |

### Figure 9b-Body Width by Group;

The NPAR1WAY Procedure

#### Analysis of Variance for Variable BODY\_WIDTH Classified by Variable GROUP

| GROUP             | N | Mean     |
|-------------------|---|----------|
| 1=Control_with    | 6 | 0.865000 |
| 2=Control_without | 6 | 0.838333 |
| 3=CNP             | 6 | 0.800000 |
| 4=AgCNP           | 3 | 0.933333 |

#### Kruskal-Wallis Test

Chi-Square DF Pr > ChiSq

1.0629 3 **0.7860**

Did not reach formal statistical significance so multiple comparisons not indicated.

GROUP=1=Control\_with

**Analysis Variable : BODY\_WIDTH**

| N | Minimum   | Maximum   | Mean      | Median    | Std Dev   | Std Error | Lower 95% CL for Mean | Upper 95% CL for Mean |
|---|-----------|-----------|-----------|-----------|-----------|-----------|-----------------------|-----------------------|
| 6 | 0.7200000 | 1.0000000 | 0.8650000 | 0.8750000 | 0.1482903 | 0.0605392 | 0.7093789             | 1.0206211             |

GROUP=2=Control\_without

**Analysis Variable : BODY\_WIDTH**

| N | Minimum   | Maximum   | Mean      | Median    | Std Dev   | Std Error | Lower 95% CL for Mean | Upper 95% CL for Mean |
|---|-----------|-----------|-----------|-----------|-----------|-----------|-----------------------|-----------------------|
| 6 | 0.4000000 | 1.0000000 | 0.8383333 | 0.9400000 | 0.2366784 | 0.0966236 | 0.5899546             | 1.0867121             |

GROUP=3=CNP

**Analysis Variable : BODY\_WIDTH**

| N | Minimum   | Maximum   | Mean      | Median    | Std Dev   | Std Error | Lower 95% CL for Mean | Upper 95% CL for Mean |
|---|-----------|-----------|-----------|-----------|-----------|-----------|-----------------------|-----------------------|
| 6 | 0.6000000 | 1.0000000 | 0.8000000 | 0.8000000 | 0.2190890 | 0.0894427 | 0.5700802             | 1.0299198             |

GROUP=4=AgCNP

**Analysis Variable : BODY\_WIDTH**

| N | Minimum   | Maximum   | Mean      | Median    | Std Dev   | Std Error | Lower 95% CL for Mean | Upper 95% CL for Mean |
|---|-----------|-----------|-----------|-----------|-----------|-----------|-----------------------|-----------------------|
| 3 | 0.8000000 | 1.0000000 | 0.9333333 | 1.0000000 | 0.1154701 | 0.0666667 | 0.6464898             | 1.2201768             |

**Figure 9b-Wing length by Group;**

**Analysis of Variance for Variable WING\_LENGTH  
Classified by Variable GROUP**

| GROUP             | N | Mean     |
|-------------------|---|----------|
| 1=Control_with    | 6 | 2.873333 |
| 2=Control_without | 6 | 2.816667 |
| 3=CNP             | 6 | 3.266667 |
| 4=AgCNP           | 3 | 3.233333 |

**Kruskal-Wallis Test**

| Chi-Square | DF | Pr > ChiSq |
|------------|----|------------|
| 9.8105     | 3  | 0.0202     |

GROUP=1=Control\_with

**Analysis Variable : WING\_LENGTH**

| <b>N</b> | <b>Minimum</b> | <b>Maximum</b> | <b>Mean</b> | <b>Median</b> | <b>Std Dev</b> | <b>Std Error</b> | <b>Lower<br/>95%<br/>CL for<br/>Mean</b> | <b>Upper<br/>95%<br/>CL for<br/>Mean</b> |
|----------|----------------|----------------|-------------|---------------|----------------|------------------|------------------------------------------|------------------------------------------|
| 6        | 2.6000000      | 3.5400000      | 2.8733333   | 2.7500000     | 0.3592585      | 0.1466667        | 2.4963147                                | 3.2503520                                |

GROUP=2=Control\_without

**Analysis Variable : WING\_LENGTH**

| <b>N</b> | <b>Minimum</b> | <b>Maximum</b> | <b>Mean</b> | <b>Median</b> | <b>Std Dev</b> | <b>Std Error</b> | <b>Lower<br/>95%<br/>CL for<br/>Mean</b> | <b>Upper<br/>95%<br/>CL for<br/>Mean</b> |
|----------|----------------|----------------|-------------|---------------|----------------|------------------|------------------------------------------|------------------------------------------|
| 6        | 2.5000000      | 3.0000000      | 2.8166667   | 2.9000000     | 0.2228602      | 0.0909823        | 2.5827892                                | 3.0505441                                |

GROUP=3=CNP

**Analysis Variable : WING\_LENGTH**

| <b>N</b> | <b>Minimum</b> | <b>Maximum</b> | <b>Mean</b> | <b>Median</b> | <b>Std Dev</b> | <b>Std Error</b> | <b>Lower<br/>95%<br/>CL for<br/>Mean</b> | <b>Upper<br/>95%<br/>CL for<br/>Mean</b> |
|----------|----------------|----------------|-------------|---------------|----------------|------------------|------------------------------------------|------------------------------------------|
| 6        | 3.2000000      | 3.4000000      | 3.2666667   | 3.2500000     | 0.0816497      | 0.0333333        | 3.1809806                                | 3.3523527                                |

GROUP=4=AgCNP

**Analysis Variable : WING\_LENGTH**

| <b>N</b> | <b>Minimum</b> | <b>Maximum</b> | <b>Mean</b> | <b>Median</b> | <b>Std Dev</b> | <b>Std Error</b> | <b>Lower<br/>95%<br/>CL for<br/>Mean</b> | <b>Upper<br/>95%<br/>CL for<br/>Mean</b> |
|----------|----------------|----------------|-------------|---------------|----------------|------------------|------------------------------------------|------------------------------------------|
| 3        | 3.0000000      | 3.5000000      | 3.2333333   | 3.2000000     | 0.2516611      | 0.1452966        | 2.6081724                                | 3.8584943                                |



## GROUP

1=Control\_with

2=Control\_without

3=CNP

4=AgCNP

Group sample sizes not equal, or some ranks tied. Performed Dunn's test, alpha=0.05

Comparison group = GROUP\_NEW

| Compare | Diff                                       | SE   | q    | q(0.05) | Conclude      |
|---------|--------------------------------------------|------|------|---------|---------------|
| 3 vs 2  | 9.5                                        | 3.54 | 2.68 | 2.638   | Reject        |
| 3 vs 1  | 8.17                                       | 3.54 | 2.31 | 2.638   | Do not reject |
| 3 vs 4  | Do not reject (within non-sig. comparison) |      |      |         |               |
| 4 vs 2  | 8.08                                       | 4.34 | 1.86 | 2.638   | Do not reject |
| 4 vs 1  | Do not reject (within non-sig. comparison) |      |      |         |               |
| 1 vs 2  | Do not reject (within non-sig. comparison) |      |      |         |               |

Note: "Do not reject (within non-sig. comparison)" indicates that any comparison within the range of a non-significant comparison must also be non-significant.

Reference: Biostatistical Analysis, 4th Edition, J. Zar, 2010.

**Figure 9b-Wing width by Group;**

The NPAR1WAY Procedure

**Wilcoxon Scores (Rank Sums) for Variable WING\_WIDTH  
Classified by Variable GROUP**

| GROUP             | N | Sum of Scores | Expected Under H0 | Std Dev Under H0 | Mean Score |
|-------------------|---|---------------|-------------------|------------------|------------|
| 1=Control_with    | 6 | 63.50         | 66.0              | 11.549583        | 10.583333  |
| 2=Control_without | 6 | 40.50         | 66.0              | 11.549583        | 6.750000   |
| 3=CNP             | 6 | 85.50         | 66.0              | 11.549583        | 14.250000  |
| 4=AgCNP           | 3 | 41.50         | 33.0              | 8.946268         | 13.833333  |

Average scores were used for ties.

**Kruskal-Wallis Test**

**Chi-Square DF Pr > ChiSq**

6.3253 3 **0.0968**

Did not reach formal statistical significance so multiple comparisons not indicated.

The MEANS Procedure

GROUP=1=Control\_with

**Analysis Variable : WING\_WIDTH**

| N | Minimum   | Maximum   | Mean      | Median    | Std Dev   | Std Error | Lower 95% CL for Mean | Upper 95% CL for Mean |
|---|-----------|-----------|-----------|-----------|-----------|-----------|-----------------------|-----------------------|
| 6 | 0.6000000 | 1.0000000 | 0.8000000 | 0.8000000 | 0.1264911 | 0.0516398 | 0.6672557             | 0.9327443             |

GROUP=2=Control\_without

**Analysis Variable : WING\_WIDTH**

| N | Minimum   | Maximum   | Mean      | Median    | Std Dev   | Std Error | Lower 95% CL for Mean | Upper 95% CL for Mean |
|---|-----------|-----------|-----------|-----------|-----------|-----------|-----------------------|-----------------------|
| 6 | 0.7000000 | 0.8000000 | 0.7500000 | 0.7500000 | 0.0547723 | 0.0223607 | 0.6925200             | 0.8074800             |

GROUP=3=CNP

**Analysis Variable : WING\_WIDTH**

| <b>N</b> | <b>Minimum</b> | <b>Maximum</b> | <b>Mean</b> | <b>Median</b> | <b>Std Dev</b> | <b>Std Error</b> | <b>Lower<br/>95%<br/>CL for<br/>Mean</b> | <b>Upper<br/>95%<br/>CL for<br/>Mean</b> |
|----------|----------------|----------------|-------------|---------------|----------------|------------------|------------------------------------------|------------------------------------------|
| 6        | 0.8000000      | 0.9000000      | 0.8500000   | 0.8500000     | 0.0547723      | 0.0223607        | 0.7925200                                | 0.9074800                                |

GROUP=4=AgCNP

**Analysis Variable : WING\_WIDTH**

| <b>N</b> | <b>Minimum</b> | <b>Maximum</b> | <b>Mean</b> | <b>Median</b> | <b>Std Dev</b> | <b>Std Error</b> | <b>Lower<br/>95%<br/>CL for<br/>Mean</b> | <b>Upper<br/>95%<br/>CL for<br/>Mean</b> |
|----------|----------------|----------------|-------------|---------------|----------------|------------------|------------------------------------------|------------------------------------------|
| 3        | 0.8000000      | 1.0000000      | 0.8666667   | 0.8000000     | 0.1154701      | 0.0666667        | 0.5798232                                | 1.1535102                                |
