# Supplementary material for: Exposure to nanoceria impacts larval survival, life history traits and fecundity of Aedes aegypti
Source: PubMed Central journal article supplement (PMC7540862; doi:10.1371/journal.pntd.0008654), 2020-09-25
Supplement: pntd.0008654.s010.pdf [file pntd.0008654.s010.pdf]

**Figure 10a- Egg Weight by Group;**

|                     |
|---------------------|
| Egg Weight by Group |
|---------------------|

The GLM Procedure

Dependent Variable: EGG\_WT

| Source                 | DF | Sum of Squares | Mean Square | F Value | Pr > F        |
|------------------------|----|----------------|-------------|---------|---------------|
| <b>Model</b>           | 4  | 460.208571     | 115.052143  | 5.73    | <b>0.0015</b> |
| <b>Error</b>           | 30 | 601.851429     | 20.061714   |         |               |
| <b>Corrected Total</b> | 34 | 1062.060000    |             |         |               |

The MEANS Procedure

GROUP=1=Control

Analysis Variable : EGG\_WT

| N | Minimum   | Maximum    | Mean       | Median     | Std Dev   | Std Error | Lower 95%<br>CL for Mean | Upper 95%<br>CL for Mean |
|---|-----------|------------|------------|------------|-----------|-----------|--------------------------|--------------------------|
| 7 | 6.7000000 | 27.9000000 | 18.3571429 | 17.6000000 | 7.3011089 | 2.7595598 | 11.6047434               | 25.1095423               |

GROUP=2=CNP

Analysis Variable : EGG\_WT

| N | Minimum   | Maximum    | Mean       | Median     | Std Dev   | Std Error | Lower 95%<br>CL for Mean | Upper 95%<br>CL for Mean |
|---|-----------|------------|------------|------------|-----------|-----------|--------------------------|--------------------------|
| 7 | 8.7000000 | 25.2000000 | 15.2857143 | 13.5000000 | 5.6212183 | 2.1246208 | 10.0869544               | 20.4844741               |

GROUP=3=AgCNP

Analysis Variable : EGG\_WT

| N | Minimum   | Maximum   | Mean      | Median    | Std Dev   | Std Error | Lower 95%<br>CL for Mean | Upper 95%<br>CL for Mean |
|---|-----------|-----------|-----------|-----------|-----------|-----------|--------------------------|--------------------------|
| 7 | 4.4000000 | 9.5000000 | 7.4714286 | 7.9000000 | 1.6790020 | 0.6346031 | 5.9186107                | 9.0242464                |

GROUP=4=CNP+AgNO3

Analysis Variable : EGG\_WT

| N | Minimum   | Maximum    | Mean       | Median     | Std Dev   | Std Error | Lower 95%<br>CL for Mean | Upper 95%<br>CL for Mean |
|---|-----------|------------|------------|------------|-----------|-----------|--------------------------|--------------------------|
| 7 | 8.1000000 | 15.8000000 | 12.2285714 | 12.5000000 | 2.8388462 | 1.0729830 | 9.6030766                | 14.8540662               |

GROUP=5=AgNO3

Analysis Variable : EGG\_WT

| N | Minimum   | Maximum    | Mean       | Median     | Std Dev   | Std Error | Lower 95%<br>CL for Mean | Upper 95%<br>CL for Mean |
|---|-----------|------------|------------|------------|-----------|-----------|--------------------------|--------------------------|
| 7 | 8.0000000 | 14.2000000 | 12.1571429 | 12.1000000 | 2.1274845 | 0.8041136 | 10.1895478               | 14.1247379               |

Egg Weight by Group

The GLM Procedure  
Least Squares Means

Adjustment for Multiple Comparisons: Tukey

| <b>GROUP</b>       | <b>EGG_WT LSMEAN</b> | <b>LSMEAN Number</b> |
|--------------------|----------------------|----------------------|
| <b>1=Control</b>   | 18.3571429           | 1                    |
| <b>2=CNP</b>       | 15.2857143           | 2                    |
| <b>3=AgCNP</b>     | 7.4714286            | 3                    |
| <b>4=CNP+AgNO3</b> | 12.2285714           | 4                    |
| <b>5=AgNO3</b>     | 12.1571429           | 5                    |

**Least Squares Means for effect GROUP**

Pr > |t| for H0: LSMean(i)=LSMean(j)

Dependent Variable: EGG\_WT

| <b>i/j</b> | <b>1</b> | <b>2</b> | <b>3</b>      | <b>4</b> | <b>5</b> |
|------------|----------|----------|---------------|----------|----------|
| <b>1</b>   |          | 0.7034   | <b>0.0007</b> | 0.1041   | 0.0979   |
| <b>2</b>   | 0.7034   |          | <b>0.0213</b> | 0.7069   | 0.6892   |
| <b>3</b>   | 0.0007   | 0.0213   |               | 0.2965   | 0.3107   |
| <b>4</b>   | 0.1041   | 0.7069   | 0.2965        |          | 1.0000   |
| <b>5</b>   | 0.0979   | 0.6892   | 0.3107        | 1.0000   |          |

## Figure 10c-% Eggs hatched

The FREQ Procedure

|           |                  | Table of EGGS_HATCHED_YES by GROUP |       |        |            |        |       |
|-----------|------------------|------------------------------------|-------|--------|------------|--------|-------|
| Frequency | EGGS_HATCHED_YES | GROUP                              |       |        |            |        | Total |
| Col Pct   | S                | 1=Control                          | 2=CN  | 3=AgCN | 4=CNP+AgNO | 5=AgNO |       |
|           |                  | 1                                  | P     | P      | 3          | 3      |       |
| Yes       |                  | 527                                | 586   | 492    | 577        | 527    | 2709  |
|           |                  | 87.83                              | 83.71 | 82.00  | 82.43      | 87.83  |       |
| No        |                  | 73                                 | 114   | 108    | 123        | 73     | 491   |
|           |                  | 12.17                              | 16.29 | 18.00  | 17.57      | 12.17  |       |
| Total     |                  | 600                                | 700   | 600    | 700        | 600    | 3200  |

### Statistics for Table of EGGS\_HATCHED\_YES by GROUP

| Statistic                   | DF | Value   | Prob   |
|-----------------------------|----|---------|--------|
| Chi-Square                  | 4  | 15.7366 | 0.0034 |
| Likelihood Ratio Chi-Square | 4  | 16.0806 | 0.0029 |
| Mantel-Haenszel Chi-Square  | 1  | 0.1005  | 0.7512 |
| Phi Coefficient             |    | 0.0701  |        |
| Contingency Coefficient     |    | 0.0700  |        |
| Cramer's V                  |    | 0.0701  |        |

Sample Size = 3200

Proportion Eggs Hatched with SE by Group

The FREQ Procedure

GROUP=1=Control

| <b>EGGS_HATCHED_YES</b> | <b>Frequency</b> | <b>Percent</b> | <b>Cumulative<br/>Frequency</b> | <b>Cumulative<br/>Percent</b> |
|-------------------------|------------------|----------------|---------------------------------|-------------------------------|
| <b>Yes</b>              | 527              | 87.83          | 527                             | 87.83                         |
| <b>No</b>               | 73               | 12.17          | 600                             | 100.00                        |

**Binomial Proportion**

**EGGS\_HATCHED\_YES = Yes**

**Proportion** 0.8783

**ASE** 0.0133

**95% Lower Conf Limit** 0.8522

**95% Upper Conf Limit** 0.9045

**Exact Conf Limits**

**95% Lower Conf Limit** 0.8495

**95% Upper Conf Limit** 0.9034

**Test of H0: Proportion = 0.5**

**ASE under H0** 0.0204

**Z** 18.5345

**One-sided Pr > Z** <.0001

**Two-sided Pr > |Z|** <.0001

**Sample Size = 600**

Proportion Eggs Hatched with SE by Group

The FREQ Procedure  
GROUP=2=CNP

| <b>EGGS_HATCHED_YES</b> | <b>Frequency</b> | <b>Percent</b> | <b>Cumulative<br/>Frequency</b> | <b>Cumulative<br/>Percent</b> |
|-------------------------|------------------|----------------|---------------------------------|-------------------------------|
| <b>Yes</b>              | 586              | 83.71          | 586                             | 83.71                         |
| <b>No</b>               | 114              | 16.29          | 700                             | 100.00                        |

**Binomial Proportion**

**EGGS\_HATCHED\_YES = Yes**

**Proportion** 0.8371

**ASE** 0.0140

**95% Lower Conf Limit** 0.8098

**95% Upper Conf Limit** 0.8645

**Exact Conf Limits**

**95% Lower Conf Limit** 0.8077

**95% Upper Conf Limit** 0.8637

**Test of H0: Proportion = 0.5**

**ASE under H0** 0.0189

**Z** 17.8399

**One-sided Pr > Z** <.0001

**Two-sided Pr > |Z|** <.0001

**Sample Size = 700**

Proportion Eggs Hatched with SE by Group

The FREQ Procedure  
GROUP=3=AgCNP

| <b>EGGS_HATCHED_YES</b> | <b>Frequency</b> | <b>Percent</b> | <b>Cumulative<br/>Frequency</b> | <b>Cumulative<br/>Percent</b> |
|-------------------------|------------------|----------------|---------------------------------|-------------------------------|
| <b>Yes</b>              | 492              | 82.00          | 492                             | 82.00                         |
| <b>No</b>               | 108              | 18.00          | 600                             | 100.00                        |

**Binomial Proportion**

**EGGS\_HATCHED\_YES = Yes**

**Proportion** 0.8200

**ASE** 0.0157

**95% Lower Conf Limit** 0.7893

**95% Upper Conf Limit** 0.8507

**Exact Conf Limits**

**95% Lower Conf Limit** 0.7869

**95% Upper Conf Limit** 0.8499

**Test of H0: Proportion = 0.5**

**ASE under H0** 0.0204

**Z** 15.6767

**One-sided Pr > Z** <.0001

**Two-sided Pr > |Z|** <.0001

**Sample Size = 600**

Proportion Eggs Hatched with SE by Group

The FREQ Procedure  
GROUP=4=CNP+AgNO3

| <b>EGGS_HATCHED_YES</b> | <b>Frequency</b> | <b>Percent</b> | <b>Cumulative<br/>Frequency</b> | <b>Cumulative<br/>Percent</b> |
|-------------------------|------------------|----------------|---------------------------------|-------------------------------|
| <b>Yes</b>              | 577              | 82.43          | 577                             | 82.43                         |
| <b>No</b>               | 123              | 17.57          | 700                             | 100.00                        |

**Binomial Proportion**

**EGGS\_HATCHED\_YES = Yes**

**Proportion** 0.8243

**ASE** 0.0144

**95% Lower Conf Limit** 0.7961

**95% Upper Conf Limit** 0.8525

**Exact Conf Limits**

**95% Lower Conf Limit** 0.7940

**95% Upper Conf Limit** 0.8518

**Test of H0: Proportion = 0.5**

**ASE under H0** 0.0189

**Z** 17.1596

**One-sided Pr > Z** <.0001

**Two-sided Pr > |Z|** <.0001

**Sample Size = 700**

Proportion Eggs Hatched with SE by Group

The FREQ Procedure

GROUP=5=AgNO3

| <b>EGGS_HATCHED_YES</b> | <b>Frequency</b> | <b>Percent</b> | <b>Cumulative<br/>Frequency</b> | <b>Cumulative<br/>Percent</b> |
|-------------------------|------------------|----------------|---------------------------------|-------------------------------|
| <b>Yes</b>              | 527              | 87.83          | 527                             | 87.83                         |
| <b>No</b>               | 73               | 12.17          | 600                             | 100.00                        |

**Binomial Proportion**

**EGGS\_HATCHED\_YES = Yes**

**Proportion** 0.8783

**ASE** 0.0133

**95% Lower Conf Limit** 0.8522

**95% Upper Conf Limit** 0.9045

**Exact Conf Limits**

**95% Lower Conf Limit** 0.8495

**95% Upper Conf Limit** 0.9034

**Test of H0: Proportion = 0.5**

**ASE under H0** 0.0204

**Z** 18.5345

**One-sided Pr > Z** <.0001

**Two-sided Pr > |Z|** <.0001

**Sample Size = 600**



## Chi-Square Analysis for a 2x5 table

### Tukey Style Multiple Comparisons of Proportions

Compare Diff SE q q(.05) Conclude

```
-----  
5 vs 3  4.68  1.17  4    3.585  R  
5 vs 4  4.35  1.13  3.85  3.585  R  
5 vs 2  3.37  1.13  2.98  3.585  A  
5 vs 1  0     1.17  0     3.585  A  
1 vs 3  4.68  1.17  4    3.585  R  
1 vs 4  4.35  1.13  3.85  3.585  R  
1 vs 2  3.37  1.13  2.98  3.585  A  
2 vs 3  1.31  1.13  1.16  3.585  A  
2 vs 4  0.98  1.08  0.91  3.585  A  
4 vs 3  0.33  1.13  0.29  3.585  A
```

Reference: Biostatistical Analysis, Fourth Edition, Jerrold Zar, 1999, p564.

### Tukey Style Multiple Comparisons of Proportions

Compare Diff SE q q(.01) Conclude

```
-----  
5 vs 3  4.68  1.17  4    4.603  A  
5 vs 4  4.35  1.13  3.85  4.603  A  
5 vs 2  3.37  1.13  2.98  4.603  A  
5 vs 1  0     1.17  0     4.603  A  
1 vs 3  4.68  1.17  4    4.603  A  
1 vs 4  4.35  1.13  3.85  4.603  A  
1 vs 2  3.37  1.13  2.98  4.603  A  
2 vs 3  1.31  1.13  1.16  4.603  A  
2 vs 4  0.98  1.08  0.91  4.603  A  
4 vs 3  0.33  1.13  0.29  4.603  A
```

Reference: Biostatistical Analysis, Fourth Edition, Jerrold Zar, 1999, p564.

## Figure 10c-% Adults Emerged

The FREQ Procedure

Frequency Table of ADULTS\_EMERGED\_YES by GROUP

| Col Pct | ADULTS_EMERGED_YES | GROUP     |       |         |             |         | Total |
|---------|--------------------|-----------|-------|---------|-------------|---------|-------|
|         |                    | 1=Control | 2=CNP | 3=AgCNP | 4=CNP+AgNO3 | 5=AgNO3 |       |
|         | <b>Yes</b>         | 458       | 518   | 394     | 492         | 464     | 2326  |
|         |                    | 76.33     | 74.00 | 65.67   | 70.29       | 77.33   |       |
|         | <b>No</b>          | 142       | 182   | 206     | 208         | 136     | 874   |
|         |                    | 23.67     | 26.00 | 34.33   | 29.71       | 22.67   |       |
|         | <b>Total</b>       | 600       | 700   | 600     | 700         | 600     | 3200  |

Statistics for Table of ADULTS\_EMERGED\_YES by GROUP

| Statistic                   | DF | Value   | Prob   |
|-----------------------------|----|---------|--------|
| Chi-Square                  | 4  | 28.0790 | <.0001 |
| Likelihood Ratio Chi-Square | 4  | 27.7424 | <.0001 |
| Mantel-Haenszel Chi-Square  | 1  | 0.1592  | 0.6899 |
| Phi Coefficient             |    | 0.0937  |        |
| Contingency Coefficient     |    | 0.0933  |        |
| Cramer's V                  |    | 0.0937  |        |

Sample Size = 3200

|                                            |
|--------------------------------------------|
| Proportion Adults Emerged with SE by Group |
|--------------------------------------------|

The FREQ Procedure  
 GROUP=1=Control

| <b>ADULTS_EMERGED_YES</b> | <b>Frequency</b> | <b>Percent</b> | <b>Cumulative<br/>Frequency</b> | <b>Cumulative<br/>Percent</b> |
|---------------------------|------------------|----------------|---------------------------------|-------------------------------|
| <b>Yes</b>                | 458              | 76.33          | 458                             | 76.33                         |
| <b>No</b>                 | 142              | 23.67          | 600                             | 100.00                        |

### **Binomial Proportion**

**ADULTS\_EMERGED\_YES = Yes**

**Proportion** 0.7633

**ASE** 0.0174

**95% Lower Conf Limit** 0.7293

**95% Upper Conf Limit** 0.7973

### **Exact Conf Limits**

**95% Lower Conf Limit** 0.7272

**95% Upper Conf Limit** 0.7968

### **Test of H0: Proportion = 0.5**

**ASE under H0** 0.0204

**Z** 12.9006

**One-sided Pr > Z** <.0001

**Two-sided Pr > |Z|** <.0001

**Sample Size = 600**

Proportion Adults Emerged with SE by Group

The FREQ Procedure  
GROUP=2=CNP

| <b>ADULTS_EMERGED_YES</b> | <b>Frequency</b> | <b>Percent</b> | <b>Cumulative<br/>Frequency</b> | <b>Cumulative<br/>Percent</b> |
|---------------------------|------------------|----------------|---------------------------------|-------------------------------|
| <b>Yes</b>                | 518              | 74.00          | 518                             | 74.00                         |
| <b>No</b>                 | 182              | 26.00          | 700                             | 100.00                        |

**Binomial Proportion**

**ADULTS\_EMERGED\_YES = Yes**

**Proportion** 0.7400

**ASE** 0.0166

**95% Lower Conf Limit** 0.7075

**95% Upper Conf Limit** 0.7725

**Exact Conf Limits**

**95% Lower Conf Limit** 0.7058

**95% Upper Conf Limit** 0.7721

**Test of H0: Proportion = 0.5**

**ASE under H0** 0.0189

**Z** 12.6996

**One-sided Pr > Z** <.0001

**Two-sided Pr > |Z|** <.0001

**Sample Size = 700**

Proportion Adults Emerged with SE by Group

The FREQ Procedure  
GROUP=3=AgCNP

| <b>ADULTS_EMERGED_YES</b> | <b>Frequency</b> | <b>Percent</b> | <b>Cumulative<br/>Frequency</b> | <b>Cumulative<br/>Percent</b> |
|---------------------------|------------------|----------------|---------------------------------|-------------------------------|
| <b>Yes</b>                | 394              | 65.67          | 394                             | 65.67                         |
| <b>No</b>                 | 206              | 34.33          | 600                             | 100.00                        |

**Binomial Proportion**

**ADULTS\_EMERGED\_YES = Yes**

**Proportion** 0.6567

**ASE** 0.0194

**95% Lower Conf Limit** 0.6187

**95% Upper Conf Limit** 0.6947

**Exact Conf Limits**

**95% Lower Conf Limit** 0.6171

**95% Upper Conf Limit** 0.6946

**Test of H0: Proportion = 0.5**

**ASE under H0** 0.0204

**Z** 7.6751

**One-sided Pr > Z** <.0001

**Two-sided Pr > |Z|** <.0001

**Sample Size = 600**

Proportion Adults Emerged with SE by Group

The FREQ Procedure  
GROUP=4=CNP+AgNO3

| <b>ADULTS_EMERGED_YES</b> | <b>Frequency</b> | <b>Percent</b> | <b>Cumulative<br/>Frequency</b> | <b>Cumulative<br/>Percent</b> |
|---------------------------|------------------|----------------|---------------------------------|-------------------------------|
| <b>Yes</b>                | 492              | 70.29          | 492                             | 70.29                         |
| <b>No</b>                 | 208              | 29.71          | 700                             | 100.00                        |

**Binomial Proportion**

**ADULTS\_EMERGED\_YES = Yes**

**Proportion** 0.7029

**ASE** 0.0173

**95% Lower Conf Limit** 0.6690

**95% Upper Conf Limit** 0.7367

**Exact Conf Limits**

**95% Lower Conf Limit** 0.6675

**95% Upper Conf Limit** 0.7365

**Test of H0: Proportion = 0.5**

**ASE under H0** 0.0189

**Z** 10.7342

**One-sided Pr > Z** <.0001

**Two-sided Pr > |Z|** <.0001

**Sample Size = 700**

Proportion Adults Emerged with SE by Group

The FREQ Procedure  
GROUP=5=AgNO3

| <b>ADULTS_EMERGED_YES</b> | <b>Frequency</b> | <b>Percent</b> | <b>Cumulative<br/>Frequency</b> | <b>Cumulative<br/>Percent</b> |
|---------------------------|------------------|----------------|---------------------------------|-------------------------------|
| <b>Yes</b>                | 464              | 77.33          | 464                             | 77.33                         |
| <b>No</b>                 | 136              | 22.67          | 600                             | 100.00                        |

**Binomial Proportion**

**ADULTS\_EMERGED\_YES = Yes**

**Proportion** 0.7733

**ASE** 0.0171

**95% Lower Conf Limit** 0.7398

**95% Upper Conf Limit** 0.8068

**Exact Conf Limits**

**95% Lower Conf Limit** 0.7377

**95% Upper Conf Limit** 0.8063

**Test of H0: Proportion = 0.5**

**ASE under H0** 0.0204

**Z** 13.3905

**One-sided Pr > Z** <.0001

**Two-sided Pr > |Z|** <.0001

**Sample Size = 600**

Tukey Style Multiple Comparisons of Proportions

Compare Diff SE q q(.01) Conclude

|        | Compare | Diff | SE   | q     | q(.01) | Conclude |
|--------|---------|------|------|-------|--------|----------|
| 5 vs 3 | 7.43    | 1.17 | 6.35 | 4.603 | R      |          |
| 5 vs 4 | 4.59    | 1.13 | 4.06 | 4.603 | A      |          |
| 5 vs 2 | 2.22    | 1.13 | 1.96 | 4.603 | A      |          |
| 5 vs 1 | 0.68    | 1.17 | 0.58 | 4.603 | A      |          |
| 1 vs 3 | 6.75    | 1.17 | 5.77 | 4.603 | R      |          |
| 1 vs 4 | 3.91    | 1.13 | 3.46 | 4.603 | A      |          |
| 1 vs 2 | 1.54    | 1.13 | 1.36 | 4.603 | A      |          |
| 2 vs 3 | 5.21    | 1.13 | 4.61 | 4.603 | R      |          |
| 2 vs 4 | 2.37    | 1.08 | 2.2  | 4.603 | A      |          |
| 4 vs 3 | 2.84    | 1.13 | 2.51 | 4.603 | A      |          |

Tukey Style Multiple Comparisons of Proportions

Compare Diff SE q q(.001) Conclude

|        | Compare | Diff | SE   | q     | q(.001) | Conclude |
|--------|---------|------|------|-------|---------|----------|
| 5 vs 3 | 7.43    | 1.17 | 6.35 | 5.484 | R       |          |
| 5 vs 4 | 4.59    | 1.13 | 4.06 | 5.484 | A       |          |
| 5 vs 2 | 2.22    | 1.13 | 1.96 | 5.484 | A       |          |
| 5 vs 1 | 0.68    | 1.17 | 0.58 | 5.484 | A       |          |
| 1 vs 3 | 6.75    | 1.17 | 5.77 | 5.484 | R       |          |
| 1 vs 4 | 3.91    | 1.13 | 3.46 | 5.484 | A       |          |
| 1 vs 2 | 1.54    | 1.13 | 1.36 | 5.484 | A       |          |
| 2 vs 3 | 5.21    | 1.13 | 4.61 | 5.484 | A       |          |
| 2 vs 4 | 2.37    | 1.08 | 2.2  | 5.484 | A       |          |
| 4 vs 3 | 2.84    | 1.13 | 2.51 | 5.484 | A       |          |

Reference: Biostatistical Analysis, Fourth Edition, Jerrold Zar, 1999, p564.

**Figure 10c-% Larvae Pupae**

Chi-Square Analysis for a 2x5 table



The FREQ Procedure

Frequency Table of LARVAE\_PUPAE\_YES by GROUP

| Col Pct | LARVAE_PUPAE_YES | GROUP     |       |         |             |         | Total |
|---------|------------------|-----------|-------|---------|-------------|---------|-------|
|         |                  | 1=Control | 2=CNP | 3=AgCNP | 4=CNP+AgNO3 | 5=AgNO3 |       |
|         | <b>Yes</b>       | 69        | 68    | 98      | 85          | 63      | 383   |
|         |                  | 11.50     | 9.71  | 16.33   | 12.14       | 10.50   |       |
|         | <b>No</b>        | 531       | 632   | 502     | 615         | 537     | 2817  |
|         |                  | 88.50     | 90.29 | 83.67   | 87.86       | 89.50   |       |
|         | <b>Total</b>     | 600       | 700   | 600     | 700         | 600     | 3200  |

Statistics for Table of LARVAE\_PUPAE\_YES by GROUP

| Statistic                   | DF | Value   | Prob   |
|-----------------------------|----|---------|--------|
| Chi-Square                  | 4  | 15.5985 | 0.0036 |
| Likelihood Ratio Chi-Square | 4  | 14.8848 | 0.0049 |
| Mantel-Haenszel Chi-Square  | 1  | 0.0383  | 0.8449 |
| Phi Coefficient             |    | 0.0698  |        |
| Contingency Coefficient     |    | 0.0696  |        |
| Cramer's V                  |    | 0.0698  |        |

Sample Size = 3200

|                                          |
|------------------------------------------|
| Proportion Larvae-Pupae with SE by Group |
|------------------------------------------|

| LARVAE_PUPAE_YES | Frequency | Percent | Cumulative Frequency | Cumulative Percent |
|------------------|-----------|---------|----------------------|--------------------|
| Yes              | 69        | 11.50   | 69                   | 11.50              |
| No               | 531       | 88.50   | 600                  | 100.00             |

### Binomial Proportion

|                        |        |
|------------------------|--------|
| LARVAE_PUPAE_YES = Yes |        |
| Proportion             | 0.1150 |
| ASE                    | 0.0130 |
| 95% Lower Conf Limit   | 0.0895 |
| 95% Upper Conf Limit   | 0.1405 |

### Exact Conf Limits

|                      |        |
|----------------------|--------|
| 95% Lower Conf Limit | 0.0906 |
| 95% Upper Conf Limit | 0.1433 |

### Test of H0: Proportion = 0.5

|                   |          |
|-------------------|----------|
| ASE under H0      | 0.0204   |
| Z                 | -18.8611 |
| One-sided Pr < Z  | <.0001   |
| Two-sided Pr >  Z | <.0001   |

Sample Size = 600

Proportion Larvae-Pupae with SE by Group

The FREQ Procedure

GROUP=2=CNP

| <b>LARVAE_PUPAE_YES</b> | <b>Frequency</b> | <b>Percent</b> | <b>Cumulative<br/>Frequency</b> | <b>Cumulative<br/>Percent</b> |
|-------------------------|------------------|----------------|---------------------------------|-------------------------------|
| <b>Yes</b>              | 68               | 9.71           | 68                              | 9.71                          |
| <b>No</b>               | 632              | 90.29          | 700                             | 100.00                        |

**Binomial Proportion**

**LARVAE\_PUPAE\_YES = Yes**

**Proportion** 0.0971

**ASE** 0.0112

**95% Lower Conf Limit** 0.0752

**95% Upper Conf Limit** 0.1191

**Exact Conf Limits**

**95% Lower Conf Limit** 0.0762

**95% Upper Conf Limit** 0.1215

**Test of H0: Proportion = 0.5**

**ASE under H0** 0.0189

**Z** -21.3172

**One-sided Pr < Z** <.0001

**Two-sided Pr > |Z|** <.0001

**Sample Size = 700**

Proportion Larvae-Pupae with SE by Group

The FREQ Procedure  
GROUP=3=AgCNP

| LARVAE_PUPAE_YES | Frequency | Percent | Cumulative<br>Frequency | Cumulative<br>Percent |
|------------------|-----------|---------|-------------------------|-----------------------|
| Yes              | 98        | 16.33   | 98                      | 16.33                 |
| No               | 502       | 83.67   | 600                     | 100.00                |

**Binomial Proportion**

|                        |        |
|------------------------|--------|
| LARVAE_PUPAE_YES = Yes |        |
| Proportion             | 0.1633 |
| ASE                    | 0.0151 |
| 95% Lower Conf Limit   | 0.1338 |
| 95% Upper Conf Limit   | 0.1929 |

**Exact Conf Limits**

|                      |        |
|----------------------|--------|
| 95% Lower Conf Limit | 0.1346 |
| 95% Upper Conf Limit | 0.1954 |

**Test of H0: Proportion = 0.5**

|                   |          |
|-------------------|----------|
| ASE under H0      | 0.0204   |
| Z                 | -16.4932 |
| One-sided Pr < Z  | <.0001   |
| Two-sided Pr >  Z | <.0001   |

**Sample Size = 600**

Proportion Larvae-Pupae with SE by Group

The FREQ Procedure  
GROUP=4=CNP+AgNO3

| LARVAE_PUPAE_YES | Frequency | Percent | Cumulative<br>Frequency | Cumulative<br>Percent |
|------------------|-----------|---------|-------------------------|-----------------------|
| Yes              | 85        | 12.14   | 85                      | 12.14                 |
| No               | 615       | 87.86   | 700                     | 100.00                |

**Binomial Proportion**

|                        |        |
|------------------------|--------|
| LARVAE_PUPAE_YES = Yes |        |
| Proportion             | 0.1214 |
| ASE                    | 0.0123 |
| 95% Lower Conf Limit   | 0.0972 |
| 95% Upper Conf Limit   | 0.1456 |

**Exact Conf Limits**

|                      |        |
|----------------------|--------|
| 95% Lower Conf Limit | 0.0982 |
| 95% Upper Conf Limit | 0.1479 |

**Test of H0: Proportion = 0.5**

|                   |          |
|-------------------|----------|
| ASE under H0      | 0.0189   |
| Z                 | -20.0321 |
| One-sided Pr < Z  | <.0001   |
| Two-sided Pr >  Z | <.0001   |

**Sample Size = 700**

Proportion Larvae-Pupae with SE by Group

The FREQ Procedure

GROUP=5=AgNO3

| <b>LARVAE_PUPAE_YES</b> | <b>Frequency</b> | <b>Percent</b> | <b>Cumulative<br/>Frequency</b> | <b>Cumulative<br/>Percent</b> |
|-------------------------|------------------|----------------|---------------------------------|-------------------------------|
| <b>Yes</b>              | 63               | 10.50          | 63                              | 10.50                         |
| <b>No</b>               | 537              | 89.50          | 600                             | 100.00                        |

**Binomial Proportion**

**LARVAE\_PUPAE\_YES = Yes**

**Proportion** 0.1050

**ASE** 0.0125

**95% Lower Conf Limit** 0.0805

**95% Upper Conf Limit** 0.1295

**Exact Conf Limits**

**95% Lower Conf Limit** 0.0816

**95% Upper Conf Limit** 0.1323

**Test of H0: Proportion = 0.5**

**ASE under H0** 0.0204

**Z** -19.3510

**One-sided Pr < Z** <.0001

**Two-sided Pr > |Z|** <.0001

**Sample Size = 600**

Tukey Style Multiple Comparisons of Proportions

Compare Diff SE q q(.05) Conclude

| Compare | Diff | SE   | q    | q(.05) | Conclude |
|---------|------|------|------|--------|----------|
| 3 vs 2  | 5.67 | 1.13 | 5.01 | 3.585  | R        |
| 3 vs 5  | 4.91 | 1.17 | 4.2  | 3.585  | R        |
| 3 vs 1  | 4    | 1.17 | 3.42 | 3.585  | A        |
| 3 vs 4  | 3.44 | 1.13 | 3.04 | 3.585  | A        |
| 4 vs 2  | 2.23 | 1.08 | 2.06 | 3.585  | A        |
| 4 vs 5  | 1.47 | 1.13 | 1.3  | 3.585  | A        |
| 4 vs 1  | 0.56 | 1.13 | 0.5  | 3.585  | A        |
| 1 vs 2  | 1.66 | 1.13 | 1.47 | 3.585  | A        |
| 1 vs 5  | 0.91 | 1.17 | 0.78 | 3.585  | A        |
| 5 vs 2  | 0.75 | 1.13 | 0.67 | 3.585  | A        |

Tukey Style Multiple Comparisons of Proportions

Compare Diff SE q q(.01) Conclude

| Compare | Diff | SE   | q    | q(.01) | Conclude |
|---------|------|------|------|--------|----------|
| 3 vs 2  | 5.67 | 1.13 | 5.01 | 4.603  | R        |
| 3 vs 5  | 4.91 | 1.17 | 4.2  | 4.603  | A        |
| 3 vs 1  | 4    | 1.17 | 3.42 | 4.603  | A        |
| 3 vs 4  | 3.44 | 1.13 | 3.04 | 4.603  | A        |
| 4 vs 2  | 2.23 | 1.08 | 2.06 | 4.603  | A        |
| 4 vs 5  | 1.47 | 1.13 | 1.3  | 4.603  | A        |
| 4 vs 1  | 0.56 | 1.13 | 0.5  | 4.603  | A        |
| 1 vs 2  | 1.66 | 1.13 | 1.47 | 4.603  | A        |
| 1 vs 5  | 0.91 | 1.17 | 0.78 | 4.603  | A        |
| 5 vs 2  | 0.75 | 1.13 | 0.67 | 4.603  | A        |

Compare Diff SE q q(.001) Conclude

| Compare | Diff | SE   | q    | q(.001) | Conclude |
|---------|------|------|------|---------|----------|
| 3 vs 2  | 5.67 | 1.13 | 5.01 | 5.484   | A        |
| 3 vs 5  | 4.91 | 1.17 | 4.2  | 5.484   | A        |
| 3 vs 1  | 4    | 1.17 | 3.42 | 5.484   | A        |
| 3 vs 4  | 3.44 | 1.13 | 3.04 | 5.484   | A        |
| 4 vs 2  | 2.23 | 1.08 | 2.06 | 5.484   | A        |
| 4 vs 5  | 1.47 | 1.13 | 1.3  | 5.484   | A        |
| 4 vs 1  | 0.56 | 1.13 | 0.5  | 5.484   | A        |
| 1 vs 2  | 1.66 | 1.13 | 1.47 | 5.484   | A        |
| 1 vs 5  | 0.91 | 1.17 | 0.78 | 5.484   | A        |
| 5 vs 2  | 0.75 | 1.13 | 0.67 | 5.484   | A        |

**Figure 10d-% Female**

Proportion Female with SE by Group

For FEMALES\_YES \* GROUP  
 all data are missing because  
 all levels of variable FEMALES\_YES are  
 missing.

Proportion Female with SE by Group

The FREQ Procedure

Frequency Table of FEMALES\_YES by GROUP

| Col Pct | FEMALES_YES  | GROUP     |       |         |             |         | Total |
|---------|--------------|-----------|-------|---------|-------------|---------|-------|
|         |              | 1=Control | 2=CNP | 3=AgCNP | 4=CNP+AgNO3 | 5=AgNO3 |       |
|         | <b>Yes</b>   | 245       | 259   | 190     | 234         | 213     | 1141  |
|         |              | 53.49     | 50.00 | 48.22   | 47.56       | 45.91   |       |
|         | <b>No</b>    | 213       | 259   | 204     | 258         | 251     | 1185  |
|         |              | 46.51     | 50.00 | 51.78   | 52.44       | 54.09   |       |
|         | <b>Total</b> | 458       | 518   | 394     | 492         | 464     | 2326  |

Statistics for Table of FEMALES\_YES by GROUP

| Statistic                   | DF | Value  | Prob   |
|-----------------------------|----|--------|--------|
| Chi-Square                  | 4  | 6.1860 | 0.1857 |
| Likelihood Ratio Chi-Square | 4  | 6.1896 | 0.1854 |
| Mantel-Haenszel Chi-Square  | 1  | 5.7432 | 0.0166 |
| Phi Coefficient             |    | 0.0516 |        |
| Contingency Coefficient     |    | 0.0515 |        |
| Cramer's V                  |    | 0.0516 |        |

Sample Size = 2326



Proportion Female with SE by Group

The FREQ Procedure

GROUP=1=Control

| <b>FEMALES_YES</b> | <b>Frequency</b> | <b>Percent</b> | <b>Cumulative<br/>Frequency</b> | <b>Cumulative<br/>Percent</b> |
|--------------------|------------------|----------------|---------------------------------|-------------------------------|
|--------------------|------------------|----------------|---------------------------------|-------------------------------|

|            |     |       |     |       |
|------------|-----|-------|-----|-------|
| <b>Yes</b> | 245 | 53.49 | 245 | 53.49 |
|------------|-----|-------|-----|-------|

|           |     |       |     |        |
|-----------|-----|-------|-----|--------|
| <b>No</b> | 213 | 46.51 | 458 | 100.00 |
|-----------|-----|-------|-----|--------|

**Binomial Proportion**

**FEMALES\_YES = Yes**

**Proportion** 0.5349

**ASE** 0.0233

**95% Lower Conf Limit** 0.4893

**95% Upper Conf Limit** 0.5806

**Exact Conf Limits**

**95% Lower Conf Limit** 0.4881

**95% Upper Conf Limit** 0.5814

**Test of H0: Proportion = 0.5**

**ASE under H0** 0.0234

**Z** 1.4953

**One-sided Pr > Z** 0.0674

**Two-sided Pr > |Z|** 0.1348

**Sample Size = 458**

Proportion Female with SE by Group

The FREQ Procedure

GROUP=2=CNP

| <b>FEMALES_YES</b> | <b>Frequency</b> | <b>Percent</b> | <b>Cumulative<br/>Frequency</b> | <b>Cumulative<br/>Percent</b> |
|--------------------|------------------|----------------|---------------------------------|-------------------------------|
|--------------------|------------------|----------------|---------------------------------|-------------------------------|

|            |     |       |     |       |
|------------|-----|-------|-----|-------|
| <b>Yes</b> | 259 | 50.00 | 259 | 50.00 |
|------------|-----|-------|-----|-------|

|           |     |       |     |        |
|-----------|-----|-------|-----|--------|
| <b>No</b> | 259 | 50.00 | 518 | 100.00 |
|-----------|-----|-------|-----|--------|

**Binomial Proportion**

**FEMALES\_YES = Yes**

**Proportion** 0.5000

**ASE** 0.0220

**95% Lower Conf Limit** 0.4569

**95% Upper Conf Limit** 0.5431

**Exact Conf Limits**

**95% Lower Conf Limit** 0.4561

**95% Upper Conf Limit** 0.5439

**Test of H0: Proportion = 0.5**

**ASE under H0** 0.0220

**Z** 0.0000

**One-sided Pr < Z** 0.5000

**Two-sided Pr > |Z|** 1.0000

**Sample Size = 518**

Proportion Female with SE by Group

The FREQ Procedure  
GROUP=3=AgCNP

| <b>FEMALES_YES</b> | <b>Frequency</b> | <b>Percent</b> | <b>Cumulative<br/>Frequency</b> | <b>Cumulative<br/>Percent</b> |
|--------------------|------------------|----------------|---------------------------------|-------------------------------|
| <b>Yes</b>         | 190              | 48.22          | 190                             | 48.22                         |
| <b>No</b>          | 204              | 51.78          | 394                             | 100.00                        |

**Binomial Proportion**

**FEMALES\_YES = Yes**

**Proportion** 0.4822

**ASE** 0.0252

**95% Lower Conf Limit** 0.4329

**95% Upper Conf Limit** 0.5316

**Exact Conf Limits**

**95% Lower Conf Limit** 0.4319

**95% Upper Conf Limit** 0.5328

**Test of H0: Proportion = 0.5**

**ASE under H0** 0.0252

**Z** -0.7053

**One-sided Pr < Z** 0.2403

**Two-sided Pr > |Z|** 0.4806

**Sample Size = 394**

Proportion Female with SE by Group

The FREQ Procedure  
GROUP=4=CNP+AgNO3

| <b>FEMALES_YES</b> | <b>Frequency</b> | <b>Percent</b> | <b>Cumulative<br/>Frequency</b> | <b>Cumulative<br/>Percent</b> |
|--------------------|------------------|----------------|---------------------------------|-------------------------------|
| <b>Yes</b>         | 234              | 47.56          | 234                             | 47.56                         |
| <b>No</b>          | 258              | 52.44          | 492                             | 100.00                        |

**Binomial Proportion**

**FEMALES\_YES = Yes**

**Proportion** 0.4756

**ASE** 0.0225

**95% Lower Conf Limit** 0.4315

**95% Upper Conf Limit** 0.5197

**Exact Conf Limits**

**95% Lower Conf Limit** 0.4307

**95% Upper Conf Limit** 0.5208

**Test of H0: Proportion = 0.5**

**ASE under H0** 0.0225

**Z** -1.0820

**One-sided Pr < Z** 0.1396

**Two-sided Pr > |Z|** 0.2793

**Sample Size = 492**

Proportion Female with SE by Group

The FREQ Procedure

GROUP=5=AgNO3

| <b>FEMALES_YES</b> | <b>Frequency</b> | <b>Percent</b> | <b>Cumulative<br/>Frequency</b> | <b>Cumulative<br/>Percent</b> |
|--------------------|------------------|----------------|---------------------------------|-------------------------------|
|--------------------|------------------|----------------|---------------------------------|-------------------------------|

|            |     |       |     |       |
|------------|-----|-------|-----|-------|
| <b>Yes</b> | 213 | 45.91 | 213 | 45.91 |
|------------|-----|-------|-----|-------|

|           |     |       |     |        |
|-----------|-----|-------|-----|--------|
| <b>No</b> | 251 | 54.09 | 464 | 100.00 |
|-----------|-----|-------|-----|--------|

**Binomial Proportion**

**FEMALES\_YES = Yes**

**Proportion** 0.4591

**ASE** 0.0231

**95% Lower Conf Limit** 0.4137

**95% Upper Conf Limit** 0.5044

**Exact Conf Limits**

**95% Lower Conf Limit** 0.4130

**95% Upper Conf Limit** 0.5056

**Test of H0: Proportion = 0.5**

**ASE under H0** 0.0232

**Z** -1.7641

**One-sided Pr < Z** 0.0389

**Two-sided Pr > |Z|** 0.0777

**Sample Size = 464**
