# Supplementary material for: Exposure to nanoceria impacts larval survival, life history traits and fecundity of Aedes aegypti
Source: PubMed Central journal article supplement (PMC7540862; doi:10.1371/journal.pntd.0008654), 2020-09-25
Supplement: pntd.0008654.s011.pdf [file pntd.0008654.s011.pdf]

## Figure 11a- Eggs per Female by Group

FIRST, we'll do the analysis using zeros in the data.

All groups failed to meet normality assumption via a number of tests.

Chi-Square Analysis for a 2x4 table

The NPAR1WAY Procedure

### Wilcoxon Scores (Rank Sums) for Variable EGGS Classified by Variable GROUP

| GROUP   | N  | Sum of<br>Scores | Expected<br>Under H0 | Std Dev<br>Under H0 | Mean<br>Score |
|---------|----|------------------|----------------------|---------------------|---------------|
| 1=Blood | 83 | 19955.00         | 18094.0              | 1030.10798          | 240.421687    |
| 2=CNP   | 88 | 18448.50         | 19184.0              | 1053.12142          | 209.642045    |
| 3=AgCNP | 88 | 15900.00         | 19184.0              | 1053.12142          | 180.681818    |
| 4=AgNP  | 86 | 19329.50         | 18748.0              | 1044.08128          | 224.761628    |
| 5=AgNO3 | 90 | 21197.00         | 19620.0              | 1061.94781          | 235.522222    |

Average scores were used for ties.

### Kruskal-Wallis Test

Chi-Square DF Pr > ChiSq

12.7849 4 0.0124

GROUP=1=Blood

**Analysis Variable : EGGS**

| <b>N</b> | <b>Minimum</b> | <b>Maximum</b> | <b>Mean</b> | <b>Median</b> | <b>Std Dev</b> | <b>Std Error</b> | <b>Lower 95%<br/>CL for Mean</b> | <b>Upper 95%<br/>CL for Mean</b> |
|----------|----------------|----------------|-------------|---------------|----------------|------------------|----------------------------------|----------------------------------|
| 83       | 0              | 135.0000000    | 84.0361446  | 84.0000000    | 25.7452083     | 2.8259037        | 78.4145218                       | 89.6577673                       |

GROUP=2=CNP

**Analysis Variable : EGGS**

| <b>N</b> | <b>Minimum</b> | <b>Maximum</b> | <b>Mean</b> | <b>Median</b> | <b>Std Dev</b> | <b>Std Error</b> | <b>Lower 95%<br/>CL for Mean</b> | <b>Upper 95%<br/>CL for Mean</b> |
|----------|----------------|----------------|-------------|---------------|----------------|------------------|----------------------------------|----------------------------------|
| 88       | 0              | 132.0000000    | 77.5795455  | 78.0000000    | 27.3532539     | 2.9158667        | 71.7839447                       | 83.3751462                       |

GROUP=3=AgCNP

**Analysis Variable : EGGS**

| <b>N</b> | <b>Minimum</b> | <b>Maximum</b> | <b>Mean</b> | <b>Median</b> | <b>Std Dev</b> | <b>Std Error</b> | <b>Lower 95%<br/>CL for Mean</b> | <b>Upper 95%<br/>CL for Mean</b> |
|----------|----------------|----------------|-------------|---------------|----------------|------------------|----------------------------------|----------------------------------|
| 88       | 0              | 121.0000000    | 69.5681818  | 74.5000000    | 29.4613698     | 3.1405926        | 63.3259140                       | 75.8104496                       |

GROUP=4=AgNP

**Analysis Variable : EGGS**

| <b>N</b> | <b>Minimum</b> | <b>Maximum</b> | <b>Mean</b> | <b>Median</b> | <b>Std Dev</b> | <b>Std Error</b> | <b>Lower 95%<br/>CL for Mean</b> | <b>Upper 95%<br/>CL for Mean</b> |
|----------|----------------|----------------|-------------|---------------|----------------|------------------|----------------------------------|----------------------------------|
| 86       | 0              | 127.0000000    | 79.8488372  | 82.0000000    | 27.9909723     | 3.0183442        | 73.8475604                       | 85.8501140                       |

GROUP=5=AgNO3

**Analysis Variable : EGGS**

| <b>N</b> | <b>Minimum</b> | <b>Maximum</b> | <b>Mean</b> | <b>Median</b> | <b>Std Dev</b> | <b>Std Error</b> | <b>Lower 95%<br/>CL for Mean</b> | <b>Upper 95%<br/>CL for Mean</b> |
|----------|----------------|----------------|-------------|---------------|----------------|------------------|----------------------------------|----------------------------------|
| 90       | 0              | 132.0000000    | 80.6444444  | 85.0000000    | 32.0867193     | 3.3822372        | 73.9240112                       | 87.3648777                       |

Group sample sizes not equal, or some ranks tied. Performed Dunn's test, alpha=0.05

Comparison group = GROUP\_New

| Compare | Diff                                       | SE    | q    | q(0.05) | Conclude      |
|---------|--------------------------------------------|-------|------|---------|---------------|
| 1 vs 3  | 59.74                                      | 19.23 | 3.11 | 2.807   | Reject        |
| 1 vs 2  | 30.78                                      | 19.23 | 1.6  | 2.807   | Do not reject |
| 1 vs 4  | Do not reject (within non-sig. comparison) |       |      |         |               |
| 1 vs 5  | Do not reject (within non-sig. comparison) |       |      |         |               |
| 5 vs 3  | 54.84                                      | 18.84 | 2.91 | 2.807   | Reject        |
| 5 vs 2  | Do not reject (within non-sig. comparison) |       |      |         |               |
| 5 vs 4  | Do not reject (within non-sig. comparison) |       |      |         |               |
| 4 vs 3  | 44.08                                      | 19.06 | 2.31 | 2.807   | Do not reject |
| 4 vs 2  | Do not reject (within non-sig. comparison) |       |      |         |               |
| 2 vs 3  | Do not reject (within non-sig. comparison) |       |      |         |               |

Note: "Do not reject (within non-sig. comparison)" indicates that any comparison within the range of a non-significant comparison must also be non-significant.

Reference: Biostatistical Analysis, 4th Edition, J. Zar, 2010.

**Removing zeros from the data results in normally distributed values for Eggs.**

The MEANS Procedure  
GROUP=1=Blood

**Analysis Variable : EGGS**

| <b>N</b> | <b>Minimum</b> | <b>Maximum</b> | <b>Mean</b> | <b>Median</b> | <b>Std Dev</b> | <b>Std Error</b> | <b>Lower 95%<br/>CL for Mean</b> | <b>Upper 95%<br/>CL for Mean</b> |
|----------|----------------|----------------|-------------|---------------|----------------|------------------|----------------------------------|----------------------------------|
| 82       | 13.0000000     | 135.0000000    | 85.0609756  | 84.5000000    | 24.1402014     | 2.6658393        | 79.7567917                       | 90.3651596                       |

GROUP=2=CNP

**Analysis Variable : EGGS**

| <b>N</b> | <b>Minimum</b> | <b>Maximum</b> | <b>Mean</b> | <b>Median</b> | <b>Std Dev</b> | <b>Std Error</b> | <b>Lower 95%<br/>CL for Mean</b> | <b>Upper 95%<br/>CL for Mean</b> |
|----------|----------------|----------------|-------------|---------------|----------------|------------------|----------------------------------|----------------------------------|
| 85       | 18.0000000     | 132.0000000    | 80.3176471  | 80.0000000    | 23.5028933     | 2.5492467        | 75.2481904                       | 85.3871037                       |

GROUP=3=AgCNP

**Analysis Variable : EGGS**

| <b>N</b> | <b>Minimum</b> | <b>Maximum</b> | <b>Mean</b> | <b>Median</b> | <b>Std Dev</b> | <b>Std Error</b> | <b>Lower 95%<br/>CL for Mean</b> | <b>Upper 95%<br/>CL for Mean</b> |
|----------|----------------|----------------|-------------|---------------|----------------|------------------|----------------------------------|----------------------------------|
| 80       | 3.0000000      | 121.0000000    | 76.5250000  | 77.0000000    | 20.4146727     | 2.2824298        | 71.9819371                       | 81.0680629                       |

GROUP=4=AgNP

**Analysis Variable : EGGS**

| <b>N</b> | <b>Minimum</b> | <b>Maximum</b> | <b>Mean</b> | <b>Median</b> | <b>Std Dev</b> | <b>Std Error</b> | <b>Lower 95%<br/>CL for Mean</b> | <b>Upper 95%<br/>CL for Mean</b> |
|----------|----------------|----------------|-------------|---------------|----------------|------------------|----------------------------------|----------------------------------|
| 82       | 27.0000000     | 127.0000000    | 83.7439024  | 84.5000000    | 22.1804112     | 2.4494167        | 78.8703316                       | 88.6174733                       |

GROUP=5=AgNO3

**Analysis Variable : EGGS**

| <b>N</b> | <b>Minimum</b> | <b>Maximum</b> | <b>Mean</b> | <b>Median</b> | <b>Std Dev</b> | <b>Std Error</b> | <b>Lower 95%<br/>CL for Mean</b> | <b>Upper 95%<br/>CL for Mean</b> |
|----------|----------------|----------------|-------------|---------------|----------------|------------------|----------------------------------|----------------------------------|
| 82       | 44.0000000     | 132.0000000    | 88.5121951  | 88.5000000    | 20.6458939     | 2.2799576        | 83.9757947                       | 93.0485955                       |

Eggs Produced by Group

The GLM Procedure

Dependent Variable: EGGS

| Source          | DF  | Sum of Squares | Mean Square | F Value | Pr > F |
|-----------------|-----|----------------|-------------|---------|--------|
| Model           | 4   | 6840.8557      | 1710.2139   | 3.46    | 0.0086 |
| Error           | 406 | 200903.1784    | 494.8354    |         |        |
| Corrected Total | 410 | 207744.0341    |             |         |        |

The GLM Procedure  
Least Squares Means

| GROUP   | EGGS      | LSMEAN    | 95% Confidence Limits |  |
|---------|-----------|-----------|-----------------------|--|
| 1=Blood | 85.060976 | 80.231854 | 89.890097             |  |
| 2=CNP   | 80.317647 | 75.574511 | 85.060783             |  |
| 3=AgCNP | 76.525000 | 71.635887 | 81.414113             |  |
| 4=AgNP  | 83.743902 | 78.914781 | 88.573024             |  |
| 5=AgNO3 | 88.512195 | 83.683074 | 93.341317             |  |

The TTEST Procedure

Variable: EGGS

| GROUP             | Method               | N  | Mean    | Std Dev | Std Err | Minimum | Maximum |
|-------------------|----------------------|----|---------|---------|---------|---------|---------|
| 1=Blood           |                      | 82 | 85.0610 | 24.1402 | 2.6658  | 13.0000 | 135.0   |
| 2=CNP             |                      | 85 | 80.3176 | 23.5029 | 2.5492  | 18.0000 | 132.0   |
| <b>Diff (1-2)</b> | <b>Pooled</b>        |    | 4.7433  | 23.8179 | 3.6868  |         |         |
| <b>Diff (1-2)</b> | <b>Satterthwaite</b> |    | 4.7433  |         | 3.6885  |         |         |

| GROUP             | Method               | Mean    | 95% CL Mean     | Std Dev | 95% CL Std Dev  |
|-------------------|----------------------|---------|-----------------|---------|-----------------|
| 1=Blood           |                      | 85.0610 | 79.7568 90.3652 | 24.1402 | 20.9270 28.5283 |
| 2=CNP             |                      | 80.3176 | 75.2482 85.3871 | 23.5029 | 20.4233 27.6847 |
| <b>Diff (1-2)</b> | <b>Pooled</b>        | 4.7433  | -2.5360 12.0226 | 23.8179 | 21.5019 26.6975 |
| <b>Diff (1-2)</b> | <b>Satterthwaite</b> | 4.7433  | -2.5397 12.0264 |         |                 |

| Method               | Variances    | DF         | t Value     | Pr >  t       |
|----------------------|--------------|------------|-------------|---------------|
| <b>Pooled</b>        | <b>Equal</b> | <b>165</b> | <b>1.29</b> | <b>0.2000</b> |
| <b>Satterthwaite</b> | Unequal      | 164.35     | 1.29        | 0.2003        |

**Equality of Variances**

| Method          | Num DF | Den DF | F Value | Pr > F |
|-----------------|--------|--------|---------|--------|
| <b>Folded F</b> | 81     | 84     | 1.05    | 0.8075 |

=Blood vs. 3=AgCNP, t-test

The TTEST Procedure

Variable: EGGS

| GROUP      | Method        | N  | Mean    | Std Dev | Std Err | Minimum | Maximum |
|------------|---------------|----|---------|---------|---------|---------|---------|
| 1=Blood    |               | 82 | 85.0610 | 24.1402 | 2.6658  | 13.0000 | 135.0   |
| 3=AgCNP    |               | 80 | 76.5250 | 20.4147 | 2.2824  | 3.0000  | 121.0   |
| Diff (1-2) | Pooled        |    | 8.5360  | 22.3784 | 3.5167  |         |         |
| Diff (1-2) | Satterthwaite |    | 8.5360  |         | 3.5094  |         |         |

| GROUP      | Method        | Mean    | 95% CL Mean     | Std Dev | 95% CL Std Dev  |
|------------|---------------|---------|-----------------|---------|-----------------|
| 1=Blood    |               | 85.0610 | 79.7568 90.3652 | 24.1402 | 20.9270 28.5283 |
| 3=AgCNP    |               | 76.5250 | 71.9819 81.0681 | 20.4147 | 17.6679 24.1806 |
| Diff (1-2) | Pooled        | 8.5360  | 1.5909 15.4811  | 22.3784 | 20.1720 25.1310 |
| Diff (1-2) | Satterthwaite | 8.5360  | 1.6041 15.4678  |         |                 |

| Method        | Variances | DF     | t Value | Pr >  t |
|---------------|-----------|--------|---------|---------|
| Pooled        | Equal     | 160    | 2.43    | 0.0163  |
| Satterthwaite | Unequal   | 156.86 | 2.43    | 0.0161  |

**Equality of Variances**

| Method   | Num DF | Den DF | F Value | Pr > F |
|----------|--------|--------|---------|--------|
| Folded F | 81     | 79     | 1.40    | 0.1365 |

The TTEST Procedure

Variable: EGGS

| GROUP             | Method               | N  | Mean    | Std Dev | Std Err | Minimum | Maximum |
|-------------------|----------------------|----|---------|---------|---------|---------|---------|
| 1=Blood           |                      | 82 | 85.0610 | 24.1402 | 2.6658  | 13.0000 | 135.0   |
| 4=AgNP            |                      | 82 | 83.7439 | 22.1804 | 2.4494  | 27.0000 | 127.0   |
| <b>Diff (1-2)</b> | <b>Pooled</b>        |    | 1.3171  | 23.1810 | 3.6203  |         |         |
| <b>Diff (1-2)</b> | <b>Satterthwaite</b> |    | 1.3171  |         | 3.6203  |         |         |

| GROUP             | Method               | Mean    | 95% CL Mean     | Std Dev | 95% CL Std Dev  |
|-------------------|----------------------|---------|-----------------|---------|-----------------|
| 1=Blood           |                      | 85.0610 | 79.7568 90.3652 | 24.1402 | 20.9270 28.5283 |
| 4=AgNP            |                      | 83.7439 | 78.8703 88.6175 | 22.1804 | 19.2281 26.2122 |
| <b>Diff (1-2)</b> | <b>Pooled</b>        | 1.3171  | -5.8319 8.4661  | 23.1810 | 20.9082 26.0126 |
| <b>Diff (1-2)</b> | <b>Satterthwaite</b> | 1.3171  | -5.8323 8.4665  |         |                 |

| Method               | Variances | DF     | t Value | Pr >  t       |
|----------------------|-----------|--------|---------|---------------|
| <b>Pooled</b>        | Equal     | 162    | 0.36    | <b>0.7165</b> |
| <b>Satterthwaite</b> | Unequal   | 160.85 | 0.36    | 0.7165        |

**Equality of Variances**

| Method          | Num DF | Den DF | F Value | Pr > F |
|-----------------|--------|--------|---------|--------|
| <b>Folded F</b> | 81     | 81     | 1.18    | 0.4477 |



1=Blood vs. 5=AgNO3, t-test

The TTEST Procedure

Variable: EGGS

| <b>GROUP</b>      | <b>Method</b>        | <b>N</b> | <b>Mean</b> | <b>Std Dev</b> | <b>Std Err</b> | <b>Minimum</b> | <b>Maximum</b> |
|-------------------|----------------------|----------|-------------|----------------|----------------|----------------|----------------|
| <b>1=Blood</b>    |                      | 82       | 85.0610     | 24.1402        | 2.6658         | 13.0000        | 135.0          |
| <b>5=AgNO3</b>    |                      | 82       | 88.5122     | 20.6459        | 2.2800         | 44.0000        | 132.0          |
| <b>Diff (1-2)</b> | <b>Pooled</b>        |          | -3.4512     | 22.4611        | 3.5078         |                |                |
| <b>Diff (1-2)</b> | <b>Satterthwaite</b> |          | -3.4512     |                | 3.5078         |                |                |

| <b>GROUP</b>      | <b>Method</b>        | <b>Mean</b> | <b>95% CL Mean</b> | <b>Std Dev</b> | <b>95% CL Std Dev</b> |
|-------------------|----------------------|-------------|--------------------|----------------|-----------------------|
| <b>1=Blood</b>    |                      | 85.0610     | 79.7568 90.3652    | 24.1402        | 20.9270 28.5283       |
| <b>5=AgNO3</b>    |                      | 88.5122     | 83.9758 93.0486    | 20.6459        | 17.8978 24.3988       |
| <b>Diff (1-2)</b> | <b>Pooled</b>        | -3.4512     | -10.3782 3.4758    | 22.4611        | 20.2589 25.2047       |
| <b>Diff (1-2)</b> | <b>Satterthwaite</b> | -3.4512     | -10.3795 3.4770    |                |                       |

| <b>Method</b>        | <b>Variances</b> | <b>DF</b> | <b>t Value</b> | <b>Pr &gt;  t </b> |
|----------------------|------------------|-----------|----------------|--------------------|
| <b>Pooled</b>        | Equal            | 162       | -0.98          | 0.3267             |
| <b>Satterthwaite</b> | Unequal          | 158.19    | -0.98          | 0.3267             |

#### Equality of Variances

| <b>Method</b>   | <b>Num DF</b> | <b>Den DF</b> | <b>F Value</b> | <b>Pr &gt; F</b> |
|-----------------|---------------|---------------|----------------|------------------|
| <b>Folded F</b> | 81            | 81            | 1.37           | 0.1615           |
